# Supplementary material for: Copper-catalyzed formal [1 + 2 + 2]-annulation of alkyne-tethered diazoacetates and pyridines: access to polycyclic indolizines
Source: Royal Society of Chemistry journal article supplement (doi:10.1039/d0ob00222d), 2020-01-01
Supplement: d0ob00222d1.pdf [file d0ob00222d1.pdf]

## SUPPORTING INFORMATION

# Copper-catalyzed formal [1+2+2]-annulation of alkyne-tethered diazoacetates and pyridines: access to polycyclic indolizines

Shanliang Dong,<sup>a</sup> Jingjing Huang,<sup>b</sup> Hongkai Sha,<sup>b</sup> Lihua Qiu,<sup>a</sup> Wenhao Hu<sup>b</sup> and Xinfang Xu<sup>\*a, c</sup>

<sup>a</sup> Key Laboratory of Organic Synthesis of Jiangsu Province, College of Chemistry, Chemical Engineering and Materials Science, Soochow University, Suzhou 215123, China

<sup>b</sup> Guangdong Provincial Key Laboratory of Chiral Molecule and Drug Discovery, School of Pharmaceutical Sciences, Sun Yat-sen University, Guangzhou 510006, China

<sup>c</sup> Shanghai Engineering Research Center of Molecular Therapeutics and New Drug Development, School of Chemistry and Molecular Engineering, East China Normal University, 3663 North Zhongshan Rd., Shanghai 200062, China

E-mail: xinfangxu@suda.edu.cn.

## Table of Contents

|                                                                      |                |
|----------------------------------------------------------------------|----------------|
| <b>1. General Information</b>                                        | <b>S2</b>      |
| <b>2. General Procedure for the Preparation of Diazo Compounds 1</b> | <b>S2-S9</b>   |
| <b>3. General Procedure for the Pyridine Derivatives 2</b>           | <b>S9-S14</b>  |
| <b>4. General Procedure for the Formal [1+2+2] Cycloaddition</b>     | <b>S14-S32</b> |
| <b>4. 1D-NOE NMR Analysis and Control Experiments</b>                | <b>S33-S36</b> |
| <b>5. General Procedure for Scale Up</b>                             | <b>S37</b>     |
| <b>6. Derivatizations</b>                                            | <b>S37-38</b>  |
| <b>7. References</b>                                                 | <b>S38</b>     |
| <b>8. NMR Spectra for Compounds 3, 4, 5, 7, 9 and 10</b>             | <b>S39-S77</b> |
| <b>9. Single-crystal X-ray Diffraction of 3a and 10</b>              | <b>S78-S79</b> |

## General Information

All reactions were carried out in oven-dried glassware. Flash column chromatography was performed using silica gel (300-400 mesh). Analytical thin-layer chromatography was performed using glass plates pre-coated with 200-300 mesh silica gel impregnated with a fluorescent indicator (254 nm).  $^1\text{H}$  NMR and  $^{13}\text{C}$  NMR spectra were recorded in  $\text{CDCl}_3$  on a 400 MHz spectrometer; chemical shifts are reported in ppm with the solvent signal as reference, and coupling constants ( $J$ ) are given in Hertz. The peak information is described as: br = broad, s = singlet, d = doublet, t = triplet, q = quartet, m = multiplet, comp = composite. High-resolution mass spectra (HRMS) were recorded on a commercial apparatus (ESI or CI Source).

## General Procedure for the Preparation of Diazo Compounds 1.

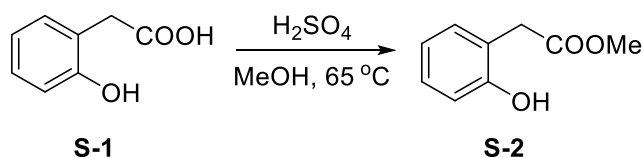

**Synthesis of S-2:** To a 250-mL oven-dried flask containing a magnetic stirring bar, **S-1** (15.2 g, 100.0 mmol) was dissolved in MeOH (75.0 mL), then added  $\text{H}_2\text{SO}_4$  (2.6 g, 10.0 mmol) slowly, and the reaction mixture was stirred at 65 °C for 36 hours. Then the reaction mixture was diluted with dichloromethane (20.0 mL) and washed with saturated  $\text{NaHCO}_3$  (200.0 mL). The organic phase was dried over  $\text{Na}_2\text{SO}_4$  and the solvent was evaporated in *vacuo* after filtration to give product **S-2** in > 90% yields, which were directly used in the next step without further purification.

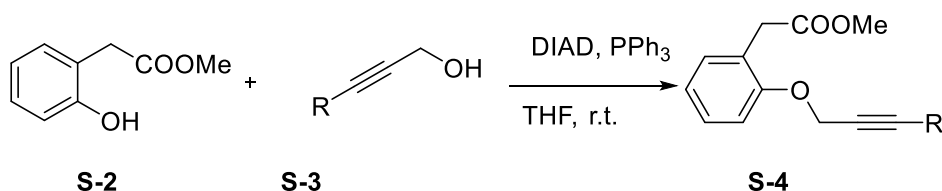

**Synthesis of S-4:** To a 50-mL oven-dried flask containing a magnetic stirring bar, **S-2** (1.7 g, 10.0 mmol), propargyl alcohol **S-3** (11.0 mmol, 1.1 equiv.),  $\text{PPh}_3$  (3.9 g, 1.5 equiv.) in dry THF (30.0 mL), was added DIAD (3.0 g, 1.5 equiv.) slowly at 0 °C,

and the reaction mixture was stirred at room temperature for 4-5 hours. Upon completed (monitored by TLC), the reaction mixture was filtrated through a short pad of Celite, and the filtrate was evaporated in *vacuo*. The residue was purified by column chromatography on silica gel (Hexanes : EtOAc = 20:1) to give the pure products **S-4** in > 80% yields.

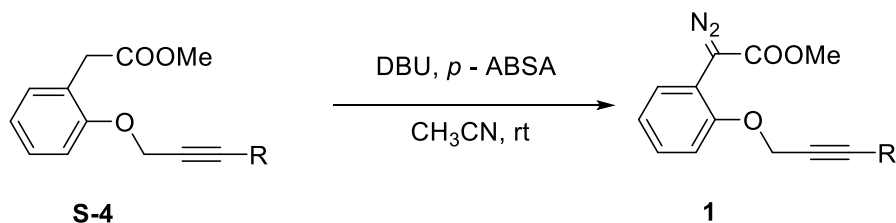

**Synthesis of 1:** To a 50-mL oven-dried flask containing a magnetic stirring bar, compound **S-4** (5.0 mmol), *p*-ABSA (7.5 mmol) in dry CH<sub>3</sub>CN (15 mL), was added DBU (10.0 mmol) in CH<sub>3</sub>CN (5 mL) dropwise at 0°C. The resulting mixture was allowed to warm to room temperature over 30 min and stirred for additional 10 h. The reaction was quenched with aqueous NH<sub>4</sub>Cl solution (60 mL) and then extracted with diethyl ether (20 mL), and the organic phase was dried over anhydrous Na<sub>2</sub>SO<sub>4</sub>. After evaporating the solvent after filtering through a short pad of Celite, the resulting residue was purified by column chromatography on silica gel (Hexanes : EtOAc = 20:1) to give pure **1** in >60% yields.

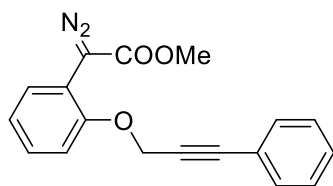

**Methyl 2-diazo-2-(2-((3-phenylprop-2-yn-1-yl)oxy)phenyl)acetate (1a).** Yellow solid; <sup>1</sup>H NMR (400 MHz, CDCl<sub>3</sub>) (δ, ppm) 7.68 – 7.60 (m, 1H), 7.51 – 7.42 (m, 2H), 7.37 – 7.27 (comp, 4H), 7.16 – 7.05 (m, 2H), 4.96 (s, 2H), 3.84 (s, 3H); <sup>13</sup>C NMR (100 MHz, CDCl<sub>3</sub>) (δ, ppm) 166.6, 153.7, 131.8, 130.3, 128.8, 128.5, 128.4, 122.2, 122.0, 114.6, 112.8, 87.6, 83.4, 57.3, 52.0; HRMS (TOF MS ESI<sup>+</sup>) calculated for C<sub>18</sub>H<sub>14</sub>N<sub>2</sub>O<sub>3</sub>Na [M+Na]<sup>+</sup>: 329.0897, found 329.0899.

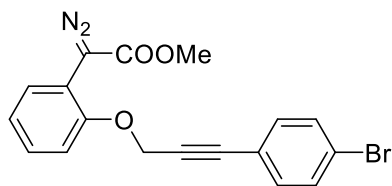

**Methyl 2-(2-((3-(4-bromophenyl)prop-2-yn-1-yl)oxy)phenyl)-2-diazoacetate (1b).**

Yellow oil;  $^1\text{H}$  NMR (400 MHz,  $\text{CDCl}_3$ ) ( $\delta$ , ppm) 7.61 – 7.59 (m, 1H), 7.45 – 7.35 (m, 2H), 7.35 – 7.20 (comp, 3H), 7.08 – 7.03 (m, 2H), 4.90 (s, 2H), 3.81 (s, 3H);  $^{13}\text{C}$  NMR (100 MHz,  $\text{CDCl}_3$ ) ( $\delta$ , ppm) 166.5, 153.6, 133.2, 131.6, 130.3, 128.5, 123.1, 122.1, 121.1, 114.6, 112.8, 86.5, 84.6, 57.2, 52.0; HRMS (TOF MS  $\text{ESI}^+$ ) calculated for  $\text{C}_{18}\text{H}_{13}\text{BrN}_2\text{O}_3\text{Na}$   $[\text{M}+\text{Na}]^+$ : 407.0002, found 406.9996.

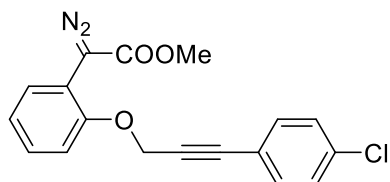

**Methyl 2-(2-((3-(4-chlorophenyl)prop-2-yn-1-yl)oxy)phenyl)-2-diazoacetate (1c).**

Yellow oil;  $^1\text{H}$  NMR (400 MHz,  $\text{CDCl}_3$ ) ( $\delta$ , ppm) 7.67 – 7.56 (m, 1H), 7.40 – 7.32 (m, 2H), 7.30 – 7.25 (comp, 3H), 7.12 – 7.05 (m, 2H), 4.95 (s, 2H), 3.84 (s, 3H);  $^{13}\text{C}$  NMR (100 MHz,  $\text{CDCl}_3$ ) ( $\delta$ , ppm) 166.7, 153.8, 135.0, 133.1, 130.4, 128.8, 128.6, 122.2, 120.7, 114.7, 112.8, 86.5, 84.4, 57.3, 52.1; HRMS (TOF MS  $\text{ESI}^+$ ) calculated for  $\text{C}_{18}\text{H}_{13}\text{ClN}_2\text{O}_3\text{Na}$   $[\text{M}+\text{Na}]^+$ : 363.0507, found 363.0515.

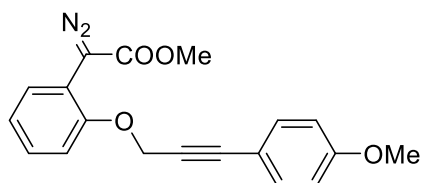

**Methyl 2-(2-((3-(4-methoxyphenyl)prop-2-yn-1-yl)oxy)phenyl)-2-diazoacetate (1d).**

Yellow oil;  $^1\text{H}$  NMR (400 MHz,  $\text{CDCl}_3$ ) ( $\delta$ , ppm) 7.63 – 7.60 (m, 1H), 7.42 – 7.35 (m, 2H), 7.29 (m, 1H), 7.15 – 7.05 (m, 2H), 6.88 – 6.82 (m, 2H), 4.95 (s, 2H), 3.84 (s, 3H), 3.81 (s, 3H);  $^{13}\text{C}$  NMR (100 MHz,  $\text{CDCl}_3$ ) ( $\delta$ , ppm) 166.7, 160.1, 153.9, 133.4, 130.3, 128.5, 122.0, 114.6, 114.3, 114.0, 112.9, 87.6, 82.1, 57.5, 55.4, 52.1; HRMS (TOF MS  $\text{ESI}^+$ ) calculated for  $\text{C}_{19}\text{H}_{16}\text{N}_2\text{O}_4\text{Na}$   $[\text{M}+\text{Na}]^+$ : 359.1002, found

359.1004.

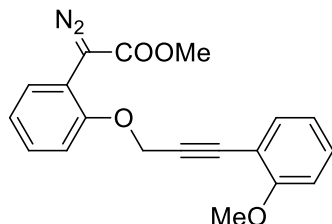

**Methyl 2-diazo-2-(2-((3-(2-methoxyphenyl)prop-2-yn-1-yl)oxy)phenyl)acetate (1e).** Yellow solid;  $^1\text{H}$  NMR (400 MHz,  $\text{CDCl}_3$ ) ( $\delta$ , ppm) 7.60 – 7.57 (m, 1H), 7.38 – 7.36 (m, 1H), 7.30 – 7.24 (m, 2H), 7.15 – 7.13 (m, 1H), 7.09 – 7.03 (m, 1H), 6.95 – 6.79 (m, 2H), 4.98 (s, 2H), 3.84 (s, 3H), 3.81 (s, 3H);  $^{13}\text{C}$  NMR (100 MHz,  $\text{CDCl}_3$ ) ( $\delta$ , ppm) 166.7, 160.3, 153.9, 133.9, 130.3, 130.2, 128.5, 121.9, 120.5, 114.5, 113.0, 111.4, 110.7, 87.4, 84.1, 57.6, 55.8, 52.0; HRMS (TOF MS  $\text{ESI}^+$ ) calculated for  $\text{C}_{19}\text{H}_{16}\text{N}_2\text{O}_4\text{Na}$   $[\text{M}+\text{Na}]^+$ : 359.1008, found 359.1017.

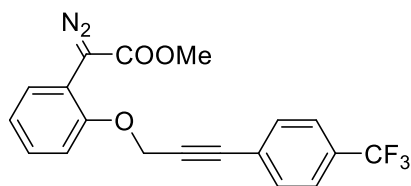

**Methyl 2-diazo-2-(2-((3-(4-(trifluoromethyl)phenyl)prop-2-yn-1-yl)oxy)phenyl)acetate (1f).** Yellow oil;  $^1\text{H}$  NMR (400 MHz,  $\text{CDCl}_3$ ) ( $\delta$ , ppm) 7.64 – 7.49 (comp, 5H), 7.32 – 7.27 (m, 1H), 7.13 – 7.04 (m, 2H), 4.98 (s, 2H), 3.84 (s, 3H);  $^{13}\text{C}$  NMR (100 MHz,  $\text{CDCl}_3$ ) ( $\delta$ , ppm) 166.6, 153.6, 132.0, 130.7, 130.4 (d,  $J = 3.1$  Hz), 128.5, 125.9 (q,  $J = 1.5$  Hz), 125.3 (q,  $J = 3.8$  Hz), 122.5, 122.2, 114.6, 112.7, 57.1, 52.0;  $^{19}\text{F}$  NMR (376 MHz,  $\text{CDCl}_3$ ) ( $\delta$ , ppm) -62.91. HRMS (TOF MS  $\text{ESI}^+$ ) calculated for  $\text{C}_{19}\text{H}_{13}\text{F}_3\text{N}_2\text{O}_3\text{Na}$   $[\text{M}+\text{Na}]^+$ : 397.0770, found 397.0767.

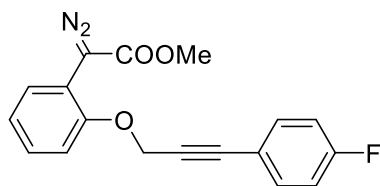

**Methyl 2-diazo-2-(2-((3-(4-fluorophenyl)prop-2-yn-1-yl)oxy)phenyl)acetate (1g).**

Yellow oil;  $^1\text{H}$  NMR (400 MHz,  $\text{CDCl}_3$ ) ( $\delta$ , ppm) 7.63 – 7.60 (m, 1H), 7.45 – 7.38 (m, 2H), 7.32 – 7.26 (m, 1H), 7.12 – 7.06 (m, 2H), 7.04 – 6.98 (m, 2H), 4.95 (s, 2H), 3.84 (s, 3H);  $^{13}\text{C}$  NMR (100 MHz,  $\text{CDCl}_3$ ) ( $\delta$ , ppm) 166.7, 162.9 (d,  $J = 250.1$  Hz), 153.8, 133.9 (d,  $J = 8.5$  Hz), 130.4, 128.6, 122.4, 118.3 (d,  $J = 3.6$  Hz), 115.7 (d,  $J = 22.1$  Hz), 114.7, 112.9, 86.6, 83.2, 57.3, 52.1;  $^{19}\text{F}$  NMR (376 MHz,  $\text{CDCl}_3$ ) ( $\delta$ , ppm) -110.06. HRMS (TOF MS  $\text{ESI}^+$ ) calculated for  $\text{C}_{18}\text{H}_{13}\text{FN}_2\text{O}_3\text{Na}$   $[\text{M}+\text{Na}]^+$ : 347.0802, found 347.0797.

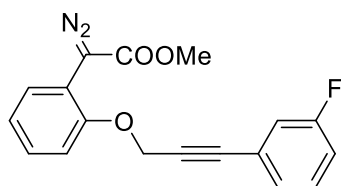

**Methyl 2-diazo-2-(2-((3-(3-fluorophenyl)prop-2-yn-1-yl)oxy)phenyl)acetate (1h).**

Yellow solid,  $^1\text{H}$  NMR (400 MHz,  $\text{CDCl}_3$ ) ( $\delta$ , ppm) 7.63 – 7.60 (m, 1H), 7.32 – 7.25 (m, 2H), 7.23 – 7.20 (m, 1H), 7.15 – 7.03 (comp, 4H), 4.96 (s, 2H), 3.84 (s, 3H);  $^{13}\text{C}$  NMR (100 MHz,  $\text{CDCl}_3$ ) ( $\delta$ , ppm) 166.7, 162.4 (d,  $J = 246.7$  Hz), 153.8, 130.5, 130.1 (d,  $J = 8.6$  Hz), 128.6, 127.8 (d,  $J = 3.1$  Hz), 124.0 (d,  $J = 9.5$  Hz), 122.2, 118.7 (d,  $J = 22.9$  Hz), 116.29 (d,  $J = 21.1$  Hz), 116.2, 114.7, 112.9, 86.4, 84.4, 57.2, 52.1;  $^{19}\text{F}$  NMR (376 MHz,  $\text{CDCl}_3$ ) ( $\delta$ , ppm) -112.72. HRMS (TOF MS  $\text{ESI}^+$ ) calculated for  $\text{C}_{18}\text{H}_{13}\text{FN}_2\text{O}_3\text{Na}$   $[\text{M}+\text{Na}]^+$ : 347.0802, found 347.0790.

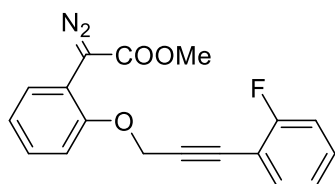

**Methyl 2-diazo-2-(2-((3-(2-fluorophenyl)prop-2-yn-1-yl)oxy)phenyl)acetate (1i).**

Yellow oil;  $^1\text{H}$  NMR (400 MHz,  $\text{CDCl}_3$ ) ( $\delta$ , ppm) 7.64 – 7.61 (m, 1H), 7.46 – 7.42 (m, 1H), 7.37 – 7.28 (m, 2H), 7.18 – 7.02 (comp, 4H), 5.00 (s, 2H), 3.85 (s, 3H);  $^{13}\text{C}$  NMR (100 MHz,  $\text{CDCl}_3$ ) ( $\delta$ , ppm) 166.6, 162.9 (d,  $J = 252.2$  Hz), 153.7, 133.7, 130.6 (d,  $J = 8.0$  Hz), 130.3, 128.5, 124.0 (d,  $J = 3.9$  Hz), 122.1, 115.6 (d,  $J = 20.7$  Hz), 114.6, 112.8, 110.7 (d,  $J = 15.6$  Hz), 88.6, 81.0, 57.2, 52.0;  $^{19}\text{F}$  NMR (376 MHz,

CDCl<sub>3</sub>) (δ, ppm) -109.78. HRMS (TOF MS ESI<sup>+</sup>) calculated for C<sub>18</sub>H<sub>13</sub>FN<sub>2</sub>O<sub>3</sub>Na [M+Na]<sup>+</sup>: 347.0802, found 347.0791.

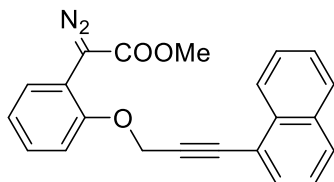

**Methyl 2-diazo-2-(2-((3-(naphthalen-1-yl)prop-2-yn-1-yl)oxy)phenyl)acetate (1j).**

Yellow solid; <sup>1</sup>H NMR (400 MHz, CDCl<sub>3</sub>) (δ, ppm) 8.25 – 8.21 (m, 1H), 7.88 – 7.83 (m, 2H), 7.70 – 7.66 (m, 2H), 7.59 – 7.50 (m, 2H), 7.44 – 7.41 (m, 1H), 7.39 – 7.30 (m, 1H), 7.21 – 7.19 (m, 1H), 7.15 – 7.11 (m, 1H), 5.12 (s, 2H), 3.84 (s, 3H); <sup>13</sup>C NMR (100 MHz, CDCl<sub>3</sub>) (δ, ppm) 166.6, 153.7, 133.3, 133.1, 130.8, 130.4, 129.3, 128.5, 128.3, 127.0, 126.5, 126.1, 125.2, 122.1, 119.8, 114.8, 113.0, 88.2, 85.8, 57.4, 52.0; HRMS (TOF MS ESI<sup>+</sup>) calculated for C<sub>22</sub>H<sub>16</sub>N<sub>2</sub>O<sub>3</sub>Na [M+Na]<sup>+</sup>: 379.1053, found 379.1062.

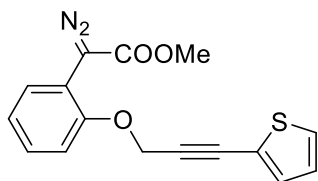

**Methyl 2-diazo-2-(2-((3-(thiophen-2-yl)prop-2-yn-1-yl)oxy)phenyl)acetate (1k).**

Yellow solid; <sup>1</sup>H NMR (400 MHz, CDCl<sub>3</sub>) (δ, ppm) 7.65 – 7.63 (m, 1H), 7.36 – 7.23 (comp, 3H), 7.17 – 7.09 (m, 2H), 7.00 – 6.98 (m, 1H), 4.99 (s, 2H), 3.86 (s, 3H); <sup>13</sup>C NMR (100 MHz, CDCl<sub>3</sub>) (δ, ppm) 166.6, 153.7, 133.0, 130.3, 128.5, 127.9, 127.1, 122.1, 122.0, 114.6, 112.8, 87.4, 80.9, 57.3, 52.0; HRMS (TOF MS ESI<sup>+</sup>) calculated for C<sub>16</sub>H<sub>12</sub>N<sub>2</sub>O<sub>3</sub>SNa [M+Na]<sup>+</sup>: 335.0461, found 335.0460.

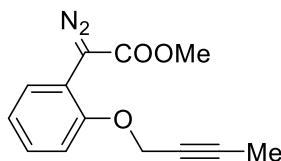

**Methyl 2-(2-(but-2-yn-1-yloxy)phenyl)-2-diazoacetate (1l).** Yellow oil; <sup>1</sup>H NMR

(400 MHz, CDCl<sub>3</sub>) (δ, ppm) 7.62 – 7.59 (m, 1H), 7.30 – 7.25 (m, 1H), 7.16 – 6.97 (m, 2H), 4.71 (t, *J* = 2.4 Hz, 2H), 3.85 (s, 3H), 1.87 (t, *J* = 2.4 Hz, 3H); <sup>13</sup>C NMR (100 MHz, CDCl<sub>3</sub>) (δ, ppm) 166.6, 153.8, 130.2, 128.4, 121.7, 114.3, 112.6, 84.1, 83.2, 73.6, 56.9, 51.9; HRMS (TOF MS ESI<sup>+</sup>) calculated for C<sub>13</sub>H<sub>12</sub>N<sub>2</sub>O<sub>3</sub>Na [M+Na]<sup>+</sup>: 267.0740, found 267.0739.

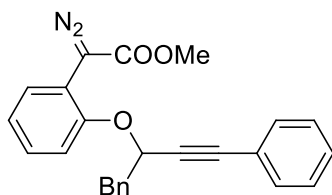

**Methyl 2-diazo-2-(2-((1,4-diphenylbut-3-yn-2-yl)oxy)phenyl)acetate (1m).** Yellow solid; <sup>1</sup>H NMR (400 MHz, CDCl<sub>3</sub>) (δ, ppm) 7.72 – 7.70 (m, 1H), 7.54 – 7.42 (comp, 6H), 7.42 – 7.32 (comp, 5H), 7.27 – 7.26 (m, 1H), 7.18 – 7.14 (m, 1H), 5.29 – 5.26 (m, 1H), 3.90 (s, 3H), 3.55 – 3.43 (m, 2H); <sup>13</sup>C NMR (100 MHz, CDCl<sub>3</sub>) (δ, ppm) 166.5, 153.6, 136.3, 131.7, 130.4, 129.7, 128.7, 128.43, 128.39, 128.3, 127.0, 122.1, 122.0, 114.7, 114.2, 87.7, 86.5, 70.6, 51.9, 42.2; HRMS (TOF MS ESI<sup>+</sup>) calculated for C<sub>25</sub>H<sub>20</sub>N<sub>2</sub>O<sub>3</sub>Na [M+Na]<sup>+</sup>: 419.1372, found 419.1378.

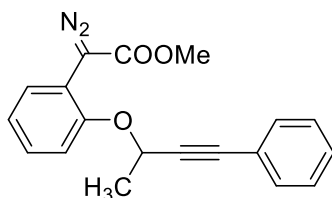

**Methyl 2-diazo-2-(2-((4-phenylbut-3-yn-2-yl)oxy)phenyl)acetate (1n).** Yellow oil; <sup>1</sup>H NMR (400 MHz, CDCl<sub>3</sub>) (δ, ppm) 7.70 – 7.61 (m, 1H), 7.47 – 7.39 (m, 2H), 7.37 – 7.27 (comp, 4H), 7.24 (d, *J* = 8.2 Hz, 1H), 7.16 – 7.04 (m, 1H), 5.15 (d, *J* = 6.5 Hz, 1H), 3.86 (s, 3H), 1.91 – 1.78 (m, 3H); <sup>13</sup>C NMR (100 MHz, CDCl<sub>3</sub>) (δ, ppm) 166.7, 153.4, 131.8, 130.1, 128.7, 128.3, 122.2, 121.9, 114.5, 113.9, 87.7, 86.1, 65.2, 52.0, 22.2; HRMS (TOF MS ESI<sup>+</sup>) calculated for C<sub>19</sub>H<sub>16</sub>N<sub>2</sub>O<sub>3</sub>Na [M+Na]<sup>+</sup>: 343.1053, found 343.1048.

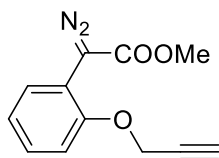

**Methyl 2-diazo-2-(2-(prop-2-yn-1-yloxy)phenyl)acetate (1q).** Yellow oil;  $^1\text{H}$  NMR (400 MHz,  $\text{CDCl}_3$ ) ( $\delta$ , ppm) 7.62 – 7.60 (m, 1H), 7.29 – 7.25 (m, 1H), 7.10 – 7.00 (m, 2H), 4.73 (d,  $J = 2.5$  Hz, 2H), 3.84 (s, 3H), 2.57 (t,  $J = 2.4$  Hz, 1H);  $^{13}\text{C}$  NMR (100 MHz,  $\text{CDCl}_3$ ) ( $\delta$ , ppm) 166.4, 153.3, 130.2, 128.4, 122.0, 114.4, 112.5, 77.9, 76.0, 56.2, 51.9; HRMS (TOF MS  $\text{ESI}^+$ ) calculated for  $\text{C}_{12}\text{H}_{10}\text{N}_2\text{O}_3\text{Na}$   $[\text{M}+\text{Na}]^+$ : 253.0584, found 253.0579.

### General Procedure for the Preparation of Pyridine Derivatives 2

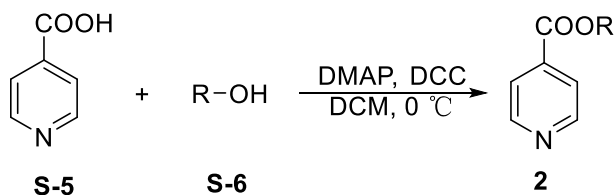

To a 50-mL oven-dried flask containing a magnetic stirring bar, **S-5** (0.676 g, 5.5 mmol, 1.1 equiv.), and alcohol **S-6** (5.0 mmol, 1.0 equiv.) in DCM (20 mL), was added DMAP (61.0 mg, 0.5 mmol, 10.0 mol%) and DCC (1.25 g, 6.0 mmol, 1.2 equiv.) in sequence at 0 °C. Then the reaction mixture was stirred for 4-5 hours at room temperature. Upon completed (monitored by TLC), the solvent was evaporated under vacuum after filtering through a short pad of Celite. The residue was purified by column chromatography on silica gel (Hexanes : EtOAc = 10:1) to give the pure products **2** as white solid with > 90% yields.

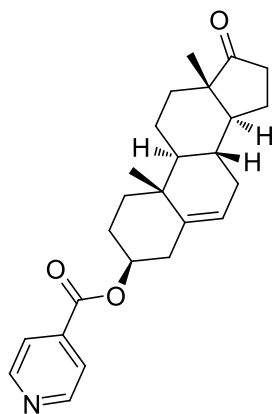

**(3S,8R,9S,10R,13S,14S)-10,13-dimethyl-17-oxo-2,3,4,7,8,9,10,11,12,13,14,15,16,17-tetradecahydro-1H-cyclopenta[a]phenanthren-3-yl isonicotinate (2A).** White solid;  $^1\text{H}$  NMR (400 MHz,  $\text{CDCl}_3$ ) ( $\delta$ , ppm) 8.84 – 8.59 (m, 2H), 7.87 – 7.73 (m, 2H), 5.43 (d,  $J = 5.1$  Hz, 1H), 4.90 – 4.82 (m, 1H), 2.47 – 2.40 (comp, 3H), 2.18 – 2.03 (m, 2H), 2.01 – 1.88 (comp, 3H), 1.86 – 1.78 (m, 1H), 1.76 – 1.59 (comp, 4H), 1.59 – 1.46 (m, 2H), 1.36 – 1.12 (comp, 4H), 1.07 (s, 3H), 0.87 (s, 3H);  $^{13}\text{C}$  NMR (100 MHz,  $\text{CDCl}_3$ ) ( $\delta$ , ppm) 164.5, 150.5, 139.6, 138.0, 123.0, 122.5, 75.5, 51.8, 50.2, 47.6, 38.1, 37.0, 36.8, 35.9, 31.53, 31.47, 30.9, 27.8, 22.0, 20.4, 19.5, 13.6; HRMS (TOF MS  $\text{ESI}^+$ ) calculated for  $\text{C}_{25}\text{H}_{31}\text{NO}_3\text{Na}$   $[\text{M}+\text{Na}]^+$ : 416.2202, found 416.2200.

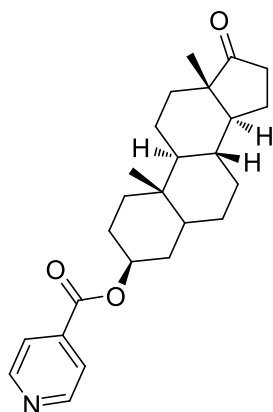

**(3S,8R,9S,10S,13S,14S)-10,13-dimethyl-17-oxohexadecahydro-1H-cyclopenta[a]phenanthren-3-yl isonicotinate (2B).** White solid;  $^1\text{H}$  NMR (400 MHz,  $\text{CDCl}_3$ ) ( $\delta$ , ppm) 8.73 – 8.46 (m, 2H), 7.84 – 7.52 (m, 2H), 4.86 – 4.78 (m, 1H), 2.32 – 2.25 (m, 1H), 1.97 – 1.87 (m, 1H), 1.86 – 1.75 (m, 2H), 1.72 – 1.57 (comp, 4H), 1.57 – 1.47 (m, 2H), 1.46 – 1.31 (m, 3H), 1.27 – 1.07 (comp, 6H), 1.01 – 0.93 (m, 1H), 0.91 – 0.81 (m, 1H), 0.76 (s, 3H), 0.72 (s, 3H), 0.65 – 0.56 (m, 1H);  $^{13}\text{C}$  NMR (100 MHz,  $\text{CDCl}_3$ ) ( $\delta$ ,

ppm) 164.3, 150.3, 137.8, 122.6, 74.9, 54.1, 51.1, 47.5, 44.4, 36.5, 35.6, 35.5, 34.8, 33.7, 31.3, 30.6, 28.1, 27.2, 21.6, 20.3, 13.6, 12.1; HRMS (TOF MS ESI<sup>+</sup>) calculated for C<sub>25</sub>H<sub>33</sub>NO<sub>3</sub>Na [M+Na]<sup>+</sup>: 418.2358, found 413.2344.

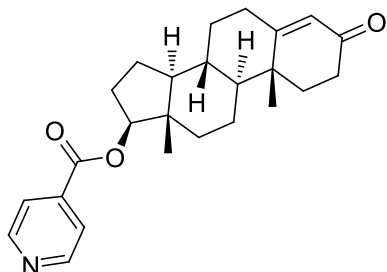

**(8R,9S,10R,13S,14S,17S)-10,13-dimethyl-3-oxo-2,3,6,7,8,9,10,11,12,13,14,15,16,17-tetradecahydro-1H-cyclopenta[a]phenanthren-17-yl isonicotinate (2C).** White solid; <sup>1</sup>H NMR (400 MHz, CDCl<sub>3</sub>) (δ, ppm) 8.78 (d, *J* = 4.6 Hz, 2H), 7.90 – 7.77 (m, 2H), 5.81 – 5.66 (m, 1H), 4.89 – 4.84 (m, 1H), 2.46 – 2.27 (comp, 5H), 2.05 – 2.00 (m, 1H), 1.91 – 1.83 (m, 2H), 1.78 – 1.58 (comp, 5H), 1.49 – 1.38 (m, 2H), 1.32 – 1.25 (m, 1H), 1.20 (s, 3H), 1.18 – 0.99 (comp, 3H), 0.97 (s, 3H); <sup>13</sup>C NMR (100 MHz, CDCl<sub>3</sub>) (δ, ppm) 199.5, 170.8, 165.0, 150.5, 138.1, 124.2, 123.0, 84.1, 53.8, 50.4, 43.1, 38.7, 36.8, 35.8, 35.5, 34.0, 32.8, 31.6, 27.7, 23.7, 20.7, 17.5, 12.4; HRMS (TOF MS ESI<sup>+</sup>) calculated for C<sub>25</sub>H<sub>33</sub>NO<sub>3</sub>Na [M+Na]<sup>+</sup>: 416.2202, found 416.2212.

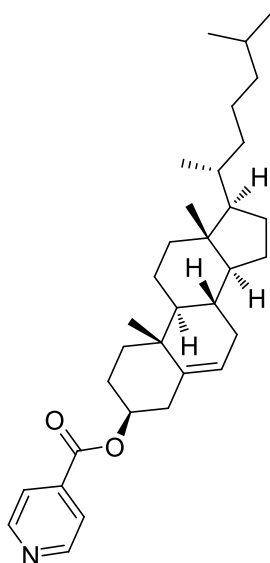

**(3S,8S,9S,10R,13R,14S,17R)-10,13-dimethyl-17-((R)-6-methylheptan-2-yl)-2,3,4,7,8,9,10,11,12,13,14,15,16,17-tetradecahydro-1H-cyclopenta[a]phenanthren-3-yl**

**isonicotinate (2D).** White solid;  $^1\text{H}$  NMR (400 MHz,  $\text{CDCl}_3$ ) ( $\delta$ , ppm) 8.77 – 8.54 (m, 2H), 7.91 – 7.62 (m, 2H), 5.35 (d,  $J = 4.3$  Hz, 1H), 4.84 – 4.76 (m, 1H), 2.40 (d,  $J = 8.0$  Hz, 2H), 1.98 – 1.64 (comp, 8H), 1.55 – 1.39 (comp, 6H), 1.30 – 1.10 (comp, 8H), 1.06 – 0.92 (comp, 8H), 0.85 (d,  $J = 6.4$  Hz, 3H), 0.82 – 0.79 (comp, 5H), 0.62 (d,  $J = 4.4$  Hz, 3H);  $^{13}\text{C}$  NMR (100 MHz,  $\text{CDCl}_3$ ) ( $\delta$ , ppm) 164.3, 150.5, 139.2, 137.9, 123.1, 122.8, 75.5, 56.6, 56.2, 50.0, 42.3, 39.5, 38.0, 36.6, 36.2, 35.8, 34.9, 31.8, 28.2, 28.0, 27.7, 25.5, 24.7, 24.3, 23.9, 22.8, 22.6, 21.0, 19.3, 18.7, 11.8; HRMS (TOF MS  $\text{ESI}^+$ ) calculated for  $\text{C}_{33}\text{H}_{49}\text{NO}_2\text{Na}$   $[\text{M}+\text{Na}]^+$ : 514.3661, found 514.3673.

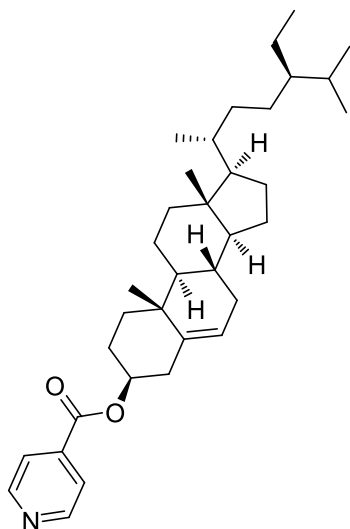

**(3S,8S,9S,10R,13R,14S,17R)-17-((2R,5R)-5-ethyl-6-methylheptan-2-yl)-10,13-dimethyl-2,3,4,7,8,9,10,11,12,13,14,15,16,17-tetradecahydro-1H-cyclopenta[*a*]phenanthren-3-yl isonicotinate (2E).** White solid;  $^1\text{H}$  NMR (400 MHz,  $\text{CDCl}_3$ ) ( $\delta$ , ppm) 8.76 (d,  $J = 5.3$  Hz, 2H), 7.88 – 7.82 (m, 2H), 5.45 – 5.40 (m, 1H), 4.92 – 4.88 (m, 1H), 2.52 – 2.43 (m, 2H), 2.03 – 1.91 (comp, 4H), 1.86 – 1.77 (m, 2H), 1.69 – 1.60 (m, 2H), 1.55 – 1.43 (comp, 5H), 1.31 – 1.14 (comp, 10H), 1.08 – 1.04 (m, 5H), 0.94 – 0.91 (comp, 4H), 0.87 – 0.81 (comp, 10H), 0.69 (s, 3H);  $^{13}\text{C}$  NMR (100 MHz,  $\text{CDCl}_3$ ) ( $\delta$ , ppm) 164.5, 150.4, 139.4, 138.3, 123.3, 123.1, 75.8, 56.8, 56.2, 50.2, 46.0, 42.5, 39.8, 38.2, 37.1, 36.8, 36.3, 34.1, 32.1, 31.99, 29.3, 28.4, 27.9, 26.2, 24.4, 23.2, 21.1, 20.0, 19.5, 19.2, 18.9, 12.1, 12.0; HRMS (TOF MS  $\text{ESI}^+$ ) calculated for  $\text{C}_{35}\text{H}_{53}\text{NO}_2\text{Na}$   $[\text{M}+\text{Na}]^+$ : 542.3974, found 542.3960.

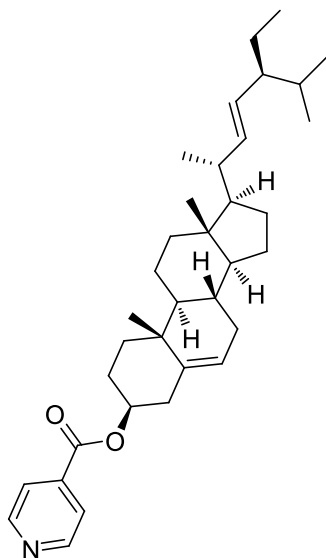

**(3S,8S,9S,10R,13R,14S,17R)-17-((2R,5S,E)-5-ethyl-6-methylhept-3-en-2-yl)-10,13-dimethyl-2,3,4,7,8,9,10,11,12,13,14,15,16,17-tetradecahydro-1H-cyclopenta[*a*]phenanthren-3-yl isonicotinate (2F).** White solid;  $^1\text{H}$  NMR (400 MHz,  $\text{CDCl}_3$ ) ( $\delta$ , ppm) 8.75 (d,  $J = 5.5$  Hz, 2H), 7.83 (d,  $J = 5.5$  Hz, 2H), 5.41 (d,  $J = 5.1$  Hz, 1H), 5.18 – 5.11(m, 1H), 5.04 – 4.98(m, 1H), 4.91 – 4.83(m, 1H), 2.46 (d,  $J = 7.5$  Hz, 2H), 2.10 – 1.85 (comp, 6H), 1.79 – 1.65(m, 2H), 1.59 – 1.43 (comp, 7H), 1.28 – 1.09 (comp, 7H), 1.08 – 0.99 (comp, 8H), 0.86 – 0.78 (comp, 8H), 0.70 (s, 3H);  $^{13}\text{C}$  NMR (100 MHz,  $\text{CDCl}_3$ ) ( $\delta$ , ppm) 199.5, 170.8, 165.0, 150.5, 138.1, 124.2, 123.0, 84.1, 53.8, 50.4, 43.1, 38.7, 36.8, 35.8, 35.5, 34.0, 32.8, 31.6, 27.7, 23.7, 20.7, 17.5, 12.4; HRMS (TOF MS  $\text{ESI}^+$ ) calculated for  $\text{C}_{35}\text{H}_{51}\text{NO}_2\text{Na}$   $[\text{M}+\text{Na}]^+$ : 540.3817, found 540.3833.

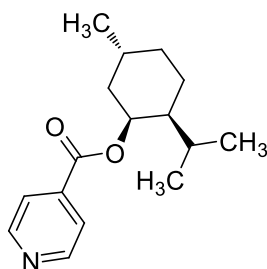

**(1S,2S,5R)-2-isopropyl-5-methylcyclohexyl isonicotinate (2G).** Colorless oil;  $^1\text{H}$  NMR (400 MHz,  $\text{CDCl}_3$ ) ( $\delta$ , ppm) 8.81 – 8.63 (m, 2H), 7.84 – 7.72 (m, 2H), 4.94 – 4.88 (m, 1H), 2.10 – 2.04 (m, 1H), 1.91 – 1.83 (m, 1H), 1.73 – 1.65 (m, 2H), 1.57 – 1.46 (m, 2H), 1.13 – 1.03 (m, 2H), 0.93 – 0.83 (comp, 7H), 0.74 (d,  $J = 7.0$  Hz, 3H);  $^{13}\text{C}$  NMR (100 MHz,  $\text{CDCl}_3$ ) ( $\delta$ , ppm) 164.6, 150.6, 138.0, 122.9, 76.0, 47.2, 40.8,

34.2, 31.5, 26.6, 23.6, 22.0, 20.8, 16.5; HRMS (TOF MS ESI<sup>+</sup>) calculated for C<sub>16</sub>H<sub>23</sub>NO<sub>2</sub>Na [M+Na]<sup>+</sup>: 284.1626, found 284.1620.

### General Procedure for the Formal [1+2+2] Cycloaddition.

To a 10-mL oven-dried vial with a magnetic stirring bar, CuCl (1.0 mg, 5.0 mol%) in freshly distilled 1,4-dioxane (1.0 mL), was added a solution of diazo compounds **1** (0.2 mmol) and pyridine **2** (0.3 mmol) in 1,4-dioxane (1.0 mL) *via* a syringe pump at room temperature under argon atmosphere in 1 h. Then the resulting reaction mixture was stirred at 40 °C for additional 18 h. After the reaction was completed, the reaction mixture was directly purified by column chromatography on silica gel (eluent: Hexanes: EtOAc = 50:1 to 20:1) to give the pure products **3** in moderate to high yields.

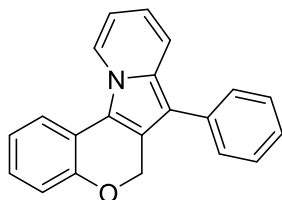

**7-Phenyl-6H-chromeno[3,4-*b*]indolizine (3a).** 44.0 mg, 74% yield. Yellow solid, mp = 166-169 °C; <sup>1</sup>H NMR (400 MHz, CDCl<sub>3</sub>) (δ, ppm) 8.50 (d, *J* = 7.1 Hz, 1H), 7.80 – 7.62 (m, 2H), 7.51 – 7.47 (m, *J* = 7.6 Hz, 2H), 7.43 – 7.37 (m, 2H), 7.36 – 7.29 (m, 1H), 7.16 – 7.09 (comp, 3H), 6.81 – 6.77 (m, 1H), 7.80 – 7.62 (m, 1H), 5.47 (s, 2H); <sup>13</sup>C NMR (100 MHz, CDCl<sub>3</sub>) (δ, ppm) 153.2, 134.3, 132.1, 129.02, 128.95, 126.6, 126.2, 123.1, 122.1, 120.8, 119.9, 119.6, 118.5, 118.1, 117.6, 116.3, 112.2, 111.4, 65.2; HRMS (TOF MS ESI<sup>+</sup>) calculated for : C<sub>21</sub>H<sub>15</sub>NONa [M+Na]<sup>+</sup>: 320.1046, found 230.1044.

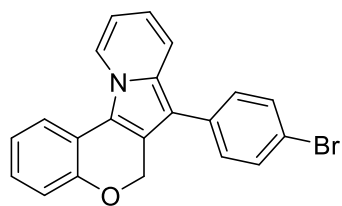

**7-(4-Bromophenyl)-6H-chromeno[3,4-*b*]indolizine (3b).** 51.0 mg, 68% yield. Yellow solid, mp = 165-166°C; <sup>1</sup>H NMR (400 MHz, CDCl<sub>3</sub>) (δ, ppm) 8.50 (d, *J* = 7.1 Hz, 1H), 7.71 – 7.69 (m, 1H), 7.66 – 7.55 (comp, 3H), 7.29 – 7.21 (m, 2H), 7.21 – 7.06 (m, 3H), 6.84 – 6.80 (m, 1H), 6.73 – 6.69 (m, 1H), 5.41 (s, 2H); <sup>13</sup>C NMR (100 MHz, CDCl<sub>3</sub>) (δ, ppm) 153.2, 133.3, 132.10, 132.08, 130.5, 126.7, 123.3, 122.2, 120.7, 120.1, 119.9, 119.4, 118.5, 118.2, 117.7, 116.6, 112.4, 110.2, 65.0; HRMS (TOF MS ESI<sup>+</sup>) calculated for C<sub>21</sub>H<sub>14</sub>BrNONa [M+Na]<sup>+</sup>: 398.0156, found 398.0147.

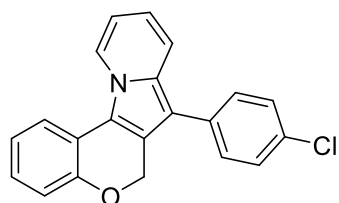

**7-(4-Chlorophenyl)-6H-chromeno[3,4-*b*]indolizine (3c).** 43.1 mg, 65% yield. Yellow solid, mp = 162-163°C; <sup>1</sup>H NMR (400 MHz, CDCl<sub>3</sub>) (δ, ppm) 8.50 (d, *J* = 7.1 Hz, 1H), 7.71 – 7.69 (m, 1H), 7.64 – 7.61 (m, 1H), 7.50 – 7.38 (m, 2H), 7.38 – 7.28 (m, 2H), 7.19 – 7.03 (comp, 3H), 6.85 – 6.74 (m, 1H), 6.73 – 6.69 (m, 1H), 5.42 (s, 2H); <sup>13</sup>C NMR (100 MHz, CDCl<sub>3</sub>) (δ, ppm) 153.2, 132.8, 132.1, 132.0, 130.2, 129.2, 126.8, 123.2, 122.2, 120.7, 119.9, 119.5, 118.5, 118.22, 117.7, 116.5, 112.4, 110.2, 65.0; HRMS (TOF MS ESI<sup>+</sup>) calculated for C<sub>21</sub>H<sub>14</sub>ClNNaO [M+Na]<sup>+</sup>: 354.0662, found 354.0670.

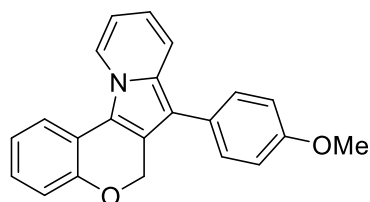

**7-(4-Methoxyphenyl)-6H-chromeno[3,4-*b*]indolizine (3d).** 39.9 mg, 61% yield. Yellow solid, mp = 133-134°C; <sup>1</sup>H NMR (400 MHz, CDCl<sub>3</sub>) (δ, ppm) 8.48 (d, *J* = 7.1 Hz, 1H), 7.71 – 7.69 (m, 1H), 7.63 (d, *J* = 8.8 Hz, 1H), 7.34 – 7.29 (m, 2H), 7.16 –

7.06 (comp, 3H), 7.05 – 6.99 (m, 2H), 6.75 (d,  $J = 9.1$  Hz, 1H), 6.69 – 6.67 (m, 1H), 5.44 (s, 2H), 3.87 (s, 3H);  $^{13}\text{C}$  NMR (100 MHz,  $\text{CDCl}_3$ ) ( $\delta$ , ppm) 158.3, 153.2, 132.0, 130.2, 126.7, 126.5, 123.1, 122.1, 120.7, 119.9, 119.7, 118.5, 117.73, 117.65, 116.1, 114.5, 112.1, 111.1, 65.2, 55.5; HRMS (TOF MS  $\text{ESI}^+$ ) calculated for  $\text{C}_{22}\text{H}_{17}\text{NO}_2\text{Na}$   $[\text{M}+\text{Na}]^+$ : 350.1157, found 350.1155.

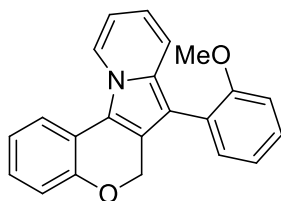

**7-(2-Methoxyphenyl)-6H-chromeno[3,4-b]indolizine (3e).** 47.1 mg, 72% yield. Yellow solid;  $^1\text{H}$  NMR (400 MHz,  $\text{CDCl}_3$ ) ( $\delta$ , ppm) 8.50 – 8.48 (m, 1H), 7.54 – 7.50 (m, 1H), 7.44 – 7.41 (m, 1H), 7.37 – 7.33 (m, 1H), 7.20 – 6.92 (comp, 6H), 6.77 – 6.73 (m, 1H), 6.69 – 6.65 (m, 1H), 5.29 (s, 2H), 3.82 (s, 3H);  $^{13}\text{C}$  NMR (100 MHz,  $\text{CDCl}_3$ ) ( $\delta$ , ppm) 156.9, 153.2, 132.6, 131.5, 131.0, 128.2, 126.5, 123.1, 122.7, 122.4, 122.0, 120.9, 119.9, 118.8, 117.7, 117.6, 116.1, 112.0, 111.1, 107.0, 66.2, 55.5; HRMS (TOF MS  $\text{ESI}^+$ ) calculated for  $\text{C}_{22}\text{H}_{17}\text{NO}_2\text{Na}$   $[\text{M}+\text{Na}]^+$ : 350.1157, found 350.1155.

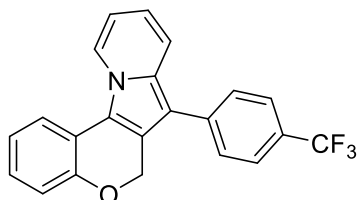

**7-(4-(Trifluoromethyl)phenyl)-6H-chromeno[3,4-b]indolizine (3f).** 45.3 mg, 62% yield. Yellow solid, mp = 167-168°C;  $^1\text{H}$  NMR (400 MHz,  $\text{CDCl}_3$ ) ( $\delta$ , ppm) 8.53 (d,  $J = 7.1$  Hz, 1H), 7.79 – 7.64 (comp, 4H), 7.48 (d,  $J = 8.0$  Hz, 2H), 7.21 – 7.01 (comp, 3H), 6.89 – 6.78 (m, 1H), 6.76 – 6.72 (m, 1H), 5.44 (s, 2H);  $^{13}\text{C}$  NMR (100 MHz,  $\text{CDCl}_3$ ) 153.2, 138.2, 132.4, 129.0, 128.2, 127.0, 125.93 (q,  $J = 3.8$  Hz), 123.4, 122.2, 120.9, 120.0, 119.3, 119.0, 118.1, 117.8, 116.9, 112.6, 110.0, 65.0;  $^{19}\text{F}$  NMR (376 MHz,  $\text{CDCl}_3$ ) ( $\delta$ , ppm) -62.25. HRMS (TOF MS  $\text{ESI}^+$ ) calculated for  $\text{C}_{22}\text{H}_{14}\text{F}_3\text{NONa}$   $[\text{M}+\text{Na}]^+$ : 388.0925, found 388.0920.

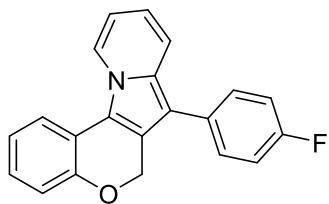

**7-(4-Fluorophenyl)-6H-chromeno[3,4-b]indolizine (3g).** 39.7 mg, 63% yield. Yellow solid, mp = 125-126°C; <sup>1</sup>H NMR (400 MHz, CDCl<sub>3</sub>) (δ, ppm) 8.49 (d, *J* = 7.1 Hz, 1H), 7.71 – 7.69 (m, 1H), 7.61 (d, *J* = 9.0 Hz, 1H), 7.38 – 7.28 (m, 2H), 7.22 – 7.05 (comp, 5H), 6.81 – 6.77 (m, 1H), 6.71 – 6.68 (m, 1H), 5.41 (s, 2H); <sup>13</sup>C NMR (100 MHz, CDCl<sub>3</sub>) (δ, ppm) 161.5 (d, *J* = 245.5 Hz), 153.0, 132.0, 130.4, 130.3, 130.13 (d, *J* = 3.4 Hz), 126.6, 123.0, 122.0, 120.6, 119.8, 119.4, 118.1 (d, *J* = 4.4 Hz), 117.6, 116.2, 115.8 (d, *J* = 21.3 Hz), 112.2, 110.2, 64.92; <sup>19</sup>F NMR (376 MHz, CDCl<sub>3</sub>) (δ, ppm) -116.40. HRMS (TOF MS ESI<sup>+</sup>) calculated for C<sub>21</sub>H<sub>14</sub>FNONa [M+Na]<sup>+</sup>: 338.0957, found 338.0948.

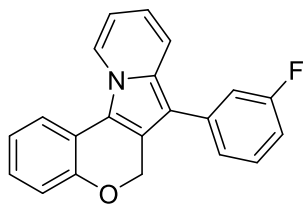

**7-(3-Fluorophenyl)-6H-chromeno[3,4-b]indolizine (3h).** 34.7 mg, 55% yield. Yellow solid, mp = 129 - 130°C; <sup>1</sup>H NMR (400 MHz, CDCl<sub>3</sub>) (δ, ppm) 8.52 – 8.49 (m, 1H), 7.78 – 7.63 (m, 2H), 7.45 – 7.39 (m, 1H), 7.21 – 7.05 (comp, 5H), 7.05 – 6.98 (m, 1H), 6.88 – 6.79 (m, 1H), 6.75 – 6.65 (m, 1H), 5.44 (s, 2H); <sup>13</sup>C NMR (100 MHz, CDCl<sub>3</sub>) (δ, ppm) 163.3 (d, *J* = 245.7 Hz), 153.2, 136.6 (d, *J* = 8.2 Hz), 132.2, 130.4 (d, *J* = 8.7 Hz), 126.8, 124.7 (d, *J* = 2.6 Hz), 123.3, 122.2, 120.8, 119.9, 119.4, 118.5 (d, *J* = 37.0 Hz), 117.7, 116.6, 115.7, 115.5, 113.0 (d, *J* = 21.2 Hz), 112.4, 110.2, 65.0; <sup>19</sup>F NMR (376 MHz, CDCl<sub>3</sub>) (δ, ppm) -112.84. HRMS (TOF MS ESI<sup>+</sup>) calculated for C<sub>21</sub>H<sub>14</sub>FNONa [M+Na]<sup>+</sup>: 338.0957, found 338.0955.

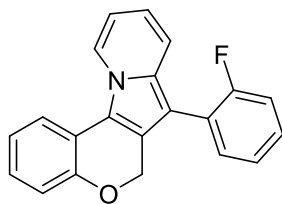

**7-(2-Fluorophenyl)-6H-chromeno[3,4-*b*]indolizine (3i).** 38.4 mg, 61% yield. Yellow solid, mp = 94-95°C; <sup>1</sup>H NMR (400 MHz, CDCl<sub>3</sub>) (δ, ppm) 8.51 (d, *J* = 7.1 Hz, 1H), 7.72 – 7.70 (m, 1H), 7.54 – 7.51 (m, 1H), 7.47 – 7.42 (m, 1H), 7.34 – 7.30 (m, 1H), 7.27 – 7.19 (m, 2H), 7.18 – 7.06 (comp, 3H), 6.83 – 6.79 (m, 1H), 6.73 – 6.69 (m, 1H), 5.36 (d, *J* = 1.4 Hz, 2H); <sup>13</sup>C NMR (100 MHz, CDCl<sub>3</sub>) (δ, ppm) 156.0 (d, *J* = 245.5 Hz), 153.2, 132.6, 131.6 (d, *J* = 3.7 Hz), 128.4 (d, *J* = 8.1 Hz), 126.7, 124.4 (d, *J* = 3.6 Hz), 123.2, 122.1, 119.9, 119.6, 118.6 (d, *J* = 2.1 Hz), 118.3, 117.7, 116.3, 116.1, 112.3, 104.4, 65.5; <sup>19</sup>F NMR (376 MHz, CDCl<sub>3</sub>) (δ, ppm) -115.59. HRMS (TOF MS ESI<sup>+</sup>) calculated for C<sub>21</sub>H<sub>14</sub>FNONa [M+Na]<sup>+</sup>: 338.0957, found 338.0966.

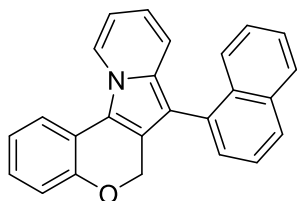

**7-(Naphthalen-1-yl)-6H-chromeno[3,4-*b*]indolizine (3j).** 43.8 mg, 63% yield. Yellow solid, mp = 94-95°C; <sup>1</sup>H NMR (400 MHz, CDCl<sub>3</sub>) (δ, ppm) 8.45 (d, *J* = 4.8 Hz, 1H), 7.84 – 7.78 (comp, 2H), 7.71 – 7.65 (comp, 2H), 7.48 – 7.38 (comp, 3H), 7.32 (t, *J* = 7.6 Hz, 1H), 7.18 – 7.14 (m, 1H), 7.04 – 6.97 (comp, 3H), 6.62 – 6.59 (m, 1H), 5.18 – 5.07 (m, 2H); <sup>13</sup>C NMR (100 MHz, CDCl<sub>3</sub>) (δ, ppm) 151.9, 133.0, 132.1, 131.6, 130.3, 127.4, 126.5, 125.4, 125.1, 124.8, 124.5, 121.9, 121.1, 120.9, 118.7, 118.6, 117.7, 116.5, 111.0, 108.1, 64.4.; HRMS (TOF MS ESI<sup>+</sup>) calculated for C<sub>25</sub>H<sub>17</sub>NONa [M+Na]<sup>+</sup>: 370.1208, found 370.1215.

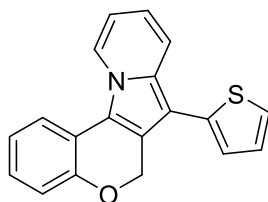

**7-(Thiophen-2-yl)-6H-chromeno[3,4-*b*]indolizine (3k).** 35.8 mg, 59% yield. Yellow

solid, mp = 96-97°C;  $^1\text{H}$  NMR (400 MHz,  $\text{CDCl}_3$ ) ( $\delta$ , ppm) 8.49 – 8.47 (m, 1H), 7.85 – 7.82 (m, 1H), 7.69 – 7.67 (m, 1H), 7.33 – 7.31 (m, 1H), 7.17 – 7.13 (m, 2H), 7.11 – 7.07 (m, 2H), 7.00 – 6.98 (m, 1H), 6.86 – 6.82 (m, 1H), 6.73 – 6.69 (m, 1H), 5.52 (s, 2H);  $^{13}\text{C}$  NMR (100 MHz,  $\text{CDCl}_3$ ) ( $\delta$ , ppm) 153.1, 136.0, 132.4, 127.8, 126.8, 124.5, 123.9, 123.2, 122.1, 120.9, 119.8, 119.3, 118.8, 118.6, 117.7, 116.5, 112.5, 104.4, 65.2; HRMS (TOF MS  $\text{ESI}^+$ ) calculated for  $\text{C}_{19}\text{H}_{13}\text{NOSNa}$   $[\text{M}+\text{Na}]^+$ : 326.0616, found 326.0612.

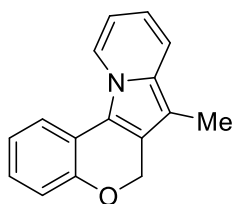

**7-Methyl-6H-chromeno[3,4-*b*]indolizine (3l).** 22.6 mg, 48% yield. Yellow oil;  $^1\text{H}$  NMR (400 MHz,  $\text{CDCl}_3$ ) ( $\delta$ , ppm) 8.39 – 8.36 (m, 1H), 7.64 – 7.62 (m, 1H), 7.36 – 7.39 (m, 1H), 7.14 – 7.00 (comp, 3H), 6.70 – 6.66 (m, 1H), 6.61 – 6.57 (m, 1H), 5.38 (s, 2H), 2.29 (s, 3H);  $^{13}\text{C}$  NMR (100 MHz,  $\text{CDCl}_3$ ) ( $\delta$ , ppm) 152.7, 132.8, 126.1, 122.9, 122.0, 121.7, 119.9, 119.5, 117.7, 117.5, 115.8, 115.1, 111.4, 104.1, 65.1, 29.8; HRMS (TOF MS  $\text{ESI}^+$ ) calculated for  $\text{C}_{16}\text{H}_{13}\text{NONa}$   $[\text{M}+\text{Na}]^+$ : 258.0895, found 258.0890.

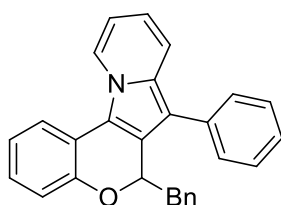

**6-Benzyl-7-phenyl-6H-chromeno[3,4-*b*]indolizine (3m).** 58.9 mg, 76% yield. Yellow oil;  $^1\text{H}$  NMR (400 MHz,  $\text{CDCl}_3$ ) ( $\delta$ , ppm) 8.54 (d,  $J = 6.4$  Hz, 1H), 7.76 (d,  $J = 7.7$  Hz, 1H), 7.59 (d,  $J = 9.1$  Hz, 1H), 7.50 – 7.45 (comp, 4H), 7.37 – 7.33 (m, 1H), 7.26 – 7.16 (comp, 4H), 7.14 – 7.10 (m, 1H), 7.09 – 7.04 (comp, 3H), 6.78 (s, 1H), 6.75 – 6.66 (m, 1H), 5.91 – 5.88 (m, 1H), 3.17 – 3.13 (m, 1H), 2.87 – 2.82 (m, 1H);  $^{13}\text{C}$  NMR (100 MHz,  $\text{CDCl}_3$ ) ( $\delta$ , ppm) 150.8, 138.1, 134.3, 132.6, 129.42, 129.41, 128.9, 128.3, 126.8, 126.48, 126.46, 124.0, 123.4, 121.8, 119.8, 119.3, 118.9, 118.6, 118.1,

115.4, 112.3, 111.4, 76.7, 41.8; HRMS (TOF MS ESI<sup>+</sup>) calculated for C<sub>28</sub>H<sub>21</sub>NONa [M+Na]<sup>+</sup>: 410.1521, found 410.1515.

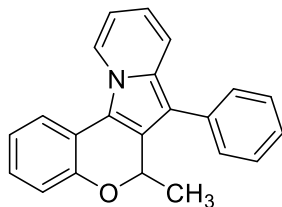

**6-Methyl-7-phenyl-6H-chromeno[3,4-*b*]indolizine (3n).** 43.0 mg, 69% yield. Yellow solid, mp = 150.5-153.0°C; <sup>1</sup>H NMR (400 MHz, CDCl<sub>3</sub>) (δ, ppm) 8.52 (d, *J* = 7.1 Hz, 1H), 7.77 – 7.72 (m, 1H), 7.55 (d, *J* = 8.9 Hz, 1H), 7.52 – 7.45 (comp, 4H), 7.36 – 7.32 (m, 1H), 7.18 – 7.05 (comp, 3H), 6.78 – 6.74 (m, 1H), 6.70 – 6.67 (m, 1H), 5.82 (q, *J* = 6.5 Hz, 1H), 1.47 (d, *J* = 6.5 Hz, 3H); <sup>13</sup>C NMR (100 MHz, CDCl<sub>3</sub>) (δ, ppm) 151.2, 134.5, 132.6, 129.6, 128.8, 126.6, 126.5, 125.5, 123.2, 121.7, 119.7, 119.1, 118.5, 118.4, 117.9, 115.1, 112.2, 111.1, 71.9, 21.8; HRMS (TOF MS ESI<sup>+</sup>) calculated for C<sub>22</sub>H<sub>17</sub>NONa [M+Na]<sup>+</sup>: 334.1208, found 334.1200.

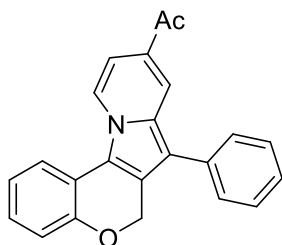

**1-(7-Phenyl-6H-chromeno[3,4-*b*]indolizin-9-yl)ethan-1-one (3o).** 52.3 mg, 77% yield. Yellow solid; <sup>1</sup>H NMR (400 MHz, CDCl<sub>3</sub>) (δ, ppm) 8.40 – 8.37 (m, 1H), 8.23 – 8.22 (m, 1H), 7.73 – 7.70 (m, 1H), 7.54 – 7.50 (m, 2H), 7.41 – 7.37 (comp, 3H), 7.27 – 7.24 (m, 1H), 7.22 – 7.18 (m, 1H), 7.13 – 7.07 (m, 2H), 5.40 (d, *J* = 1.3 Hz, 2H), 2.54 (d, *J* = 1.0 Hz, 3H); <sup>13</sup>C NMR (100 MHz, CDCl<sub>3</sub>) (δ, ppm) 195.4, 153.9, 133.2, 130.6, 129.3, 129.2, 128.1, 127.2, 126.4, 122.4, 122.3, 122.2, 121.6, 120.8, 119.6, 118.5, 118.0, 117.4, 110.1, 64.8, 25.9; HRMS (TOF MS ESI<sup>+</sup>) calculated for C<sub>23</sub>H<sub>17</sub>NO<sub>2</sub>Na [M+Na]<sup>+</sup>: 362.1157, found 362.1149.

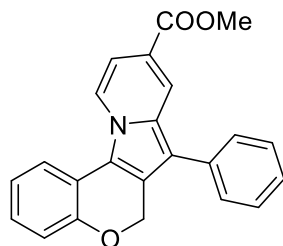

**Methyl 7-phenyl-6H-chromeno[3,4-*b*]indolizine-9-carboxylate (3p).** 51.2 mg, 72% yield. Yellow solid, mp = 129-130°C;  $^1\text{H}$  NMR (400 MHz,  $\text{CDCl}_3$ ) ( $\delta$ , ppm) 8.41 – 8.37 (m, 2H), 7.72 – 7.70(m, 1H), 7.52 – 7.48 (m, 2H), 7.39 – 7.37 (comp, 3H), 7.25 – 7.20 (m, 2H), 7.12 – 7.07 (m, 2H), 5.41 (s, 2H), 3.89 (s, 3H);  $^{13}\text{C}$  NMR (100 MHz,  $\text{CDCl}_3$ ) ( $\delta$ , ppm) 166.3, 153.8, 133.2, 131.0, 129.3, 129.2, 127.9, 127.0, 122.3, 122.21, 122.17, 122.0, 120.7, 119.1, 118.71, 118.67, 118.0, 116.5, 111.4, 64.9, 52.2; HRMS (TOF MS ESI $^+$ ) calculated for  $\text{C}_{23}\text{H}_{17}\text{NO}_3\text{Na}$   $[\text{M}+\text{Na}]^+$ : 378.1106, found 378.1100.

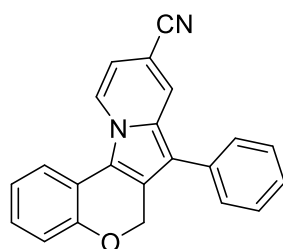

**7-Phenyl-6H-chromeno[3,4-*b*]indolizine-9-carbonitrile (3q).** 42.6 mg, 66% yield. Yellow solid, mp = 142-143°C;  $^1\text{H}$  NMR (400 MHz,  $\text{CDCl}_3$ ) ( $\delta$ , ppm) 8.46 (d,  $J$  = 7.4 Hz, 1H), 8.02 – 8.01(m, 1H), 7.72 – 7.70 (m, 1H), 7.55 – 7.48 (m, 2H), 7.43 – 7.39 (m, 1H), 7.38 – 7.34 (m, 2H), 7.24 – 7.22 (m, 1H), 7.17 – 7.07 (m, 2H), 6.78 – 6.75(m, 1H), 5.43 (s, 2H);  $^{13}\text{C}$  NMR (100 MHz,  $\text{CDCl}_3$ ) ( $\delta$ , ppm) 154.0, 132.5, 130.1, 129.3, 129.2, 128.6, 127.6, 125.7, 122.9, 122.8, 122.4, 120.8, 120.1, 118.2, 118.1, 116.7, 111.9, 99.3, 64.7; HRMS (TOF MS ESI $^+$ ) calculated for  $\text{C}_{22}\text{H}_{14}\text{N}_2\text{ONa}$   $[\text{M}+\text{Na}]^+$ : 345.1004, found 345.1008.

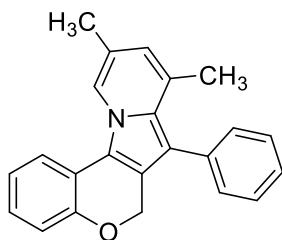

**8,10-Dimethyl-7-phenyl-6H-chromeno[3,4-*b*]indolizine (3r).** 44.2 mg, 68% yield. Yellow solid, mp = 70-71 °C; <sup>1</sup>H NMR (400 MHz, CDCl<sub>3</sub>) (δ, ppm) 8.23 (s, 1H), 7.76 – 7.73 (m, 1H), 7.42 – 7.31 (comp, 5H), 7.14 – 7.05 (comp, 3H), 6.40 (d, *J* = 1.4 Hz, 1H), 5.20 (s, 2H), 2.30 (d, *J* = 1.2 Hz, 3H), 2.07 (s, 3H); <sup>13</sup>C NMR (100 MHz, CDCl<sub>3</sub>) (δ, ppm) 153.1, 135.7, 131.3, 130.6, 129.0, 127.6, 126.7, 126.3, 122.0, 121.9, 121.7, 120.8, 120.0, 119.9, 118.9, 117.6, 115.2, 112.2, 65.2, 20.7, 18.6; HRMS (TOF MS ESI<sup>+</sup>) calculated for C<sub>23</sub>H<sub>19</sub>NONa [M+Na]<sup>+</sup>: 348.1364, found 348.1358.

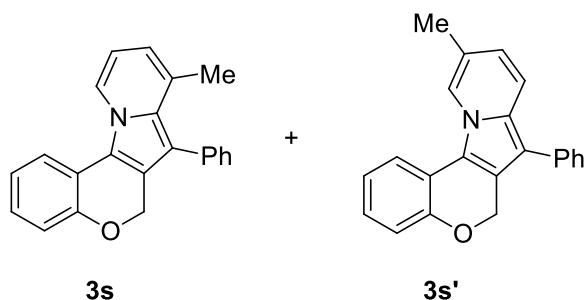

**8-Methyl-7-phenyl-6H-chromeno[3,4-*b*]indolizine (3s) and 10-Methyl-7-phenyl-6H-chromeno[3,4-*b*]indolizine (3s').** Combined in 63% yield, 39.2 mg ( **3s** : **3s'** = 6 : 1 ). Green oil; composited NMR signals of **3s** and **3s'**; <sup>1</sup>H NMR (400 MHz, CDCl<sub>3</sub>) (δ, ppm) 8.43 (d, *J* = 7.1 Hz, 1H), 8.30 (d, *J* = 0.9 Hz, 0.19H), 7.76 – 7.71 (m, 1H), 7.63 (d, *J* = 9.1 Hz, 0.19H), 7.49 (t, *J* = 7.6 Hz, 1H), 7.44 – 7.31 (comp, 5.55H), 7.16 – 7.08 (comp, 3.54H), 6.69 – 6.66(m, 0.19H), 6.61 (t, *J* = 6.9 Hz, 1H), 6.51 (d, *J* = 6.7 Hz, 1H), 5.46 (s, 0.36H), 5.23 (s, 2H), 2.35 (s, 0.55H), 2.10 (s, 3H); <sup>13</sup>C NMR (100 MHz, CDCl<sub>3</sub>) (δ, ppm) 153.2, 135.6, 134.5, 131.6, 131.4, 131.1, 129.7, 128.94, 128.91, 127.6, 126.8, 126.43, 126.37, 126.0, 122.2, 122.0, 121.6, 121.4, 121.2, 120.8, 120.3, 119.9, 119.8, 119.7, 118.5, 117.8, 117.63, 117.59, 116.0, 115.5, 112.4, 111.5, 65.2, 65.1, 22.8, 20.9; HRMS (TOF MS ESI<sup>+</sup>) calculated for C<sub>22</sub>H<sub>17</sub>NONa [M+Na]<sup>+</sup>: 334.1208, found 334.1218.

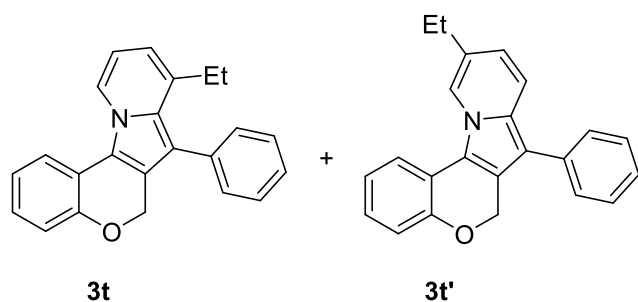

**8-Ethyl-7-phenyl-6H-chromeno[3,4-b]indolizine (3t) and 10-Ethyl-7-phenyl-6H-chromeno[3,4-b]indolizine (3t').** Combined in 65% yield, 42.3 mg ( **3t** : **3t'** = 4 : 1 ). Green oil; composited NMR signals of **3t** and **3t'**;  $^1\text{H}$  NMR (400 MHz,  $\text{CDCl}_3$ ) ( $\delta$ , ppm) 8.44 (d,  $J = 7.0$  Hz, 1H), 8.32 (s, 0.17H), 7.78 – 7.73(comp, 1.33H), 7.59 – 7.54(m, 0.18H), 7.50 – 7.33 (comp, 1.81H), 7.29 – 7.26(m, 1H), 7.16 – 6.69 (comp, 8.36H), 6.69 – 6.60 (comp, 1.18H), 6.53 (s, 1H), 5.31 – 5.13 (comp, 2.34H), 3.85 (s, 0.52H), 3.81 (s, 3.00H), 2.36 (s, 0.52H), 2.11 (s, 3H);  $^{13}\text{C}$  NMR (100 MHz,  $\text{CDCl}_3$ ) ( $\delta$ , ppm) 153.2, 153.1, 135.9, 134.5, 131.3, 131.1, 131.0, 129.0, 128.9, 128.0, 127.8, 126.9, 126.42, 126.38, 126.0, 122.3, 122.1, 122.0, 121.2, 120.5, 120.4, 120.1, 119.90, 119.88, 119.8, 119.7, 118.1, 117.7, 116.4, 116.1, 115.6, 112.0, 111.6, 111.1, 65.22, 65.15, 26.5, 25.9, 15.3, 13.9; HRMS (TOF MS  $\text{ESI}^+$ ) calculated for  $\text{C}_{24}\text{H}_{19}\text{NONa}$   $[\text{M}+\text{Na}]^+$ : 348.1364, found 348.1378.

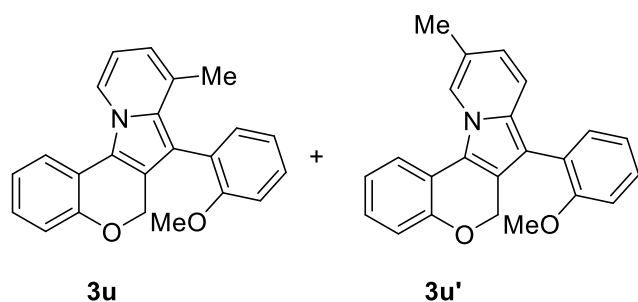

**7-(2-Methoxyphenyl)-8-methyl-6H-chromeno[3,4-b]indolizine (3u) and 7-(2-Methoxyphenyl)-10-methyl-6H-chromeno[3,4-b]indolizine (3u').** Combined in 50% yield, 34.1 mg ( **3u** : **3u'** = 6 : 1 ). Green oil; composited NMR signals of **3u** and **3u'**;  $^1\text{H}$  NMR (400 MHz,  $\text{CDCl}_3$ ) ( $\delta$ , ppm) 8.44 (d,  $J = 7.0$  Hz, 1H), 8.32 (s, 0.17H), 7.78 – 7.73(comp, 1.33H), 7.59 – 7.54(m, 0.18H), 7.50 – 7.33 (comp, 1.81H), 7.29 – 7.26(m, 1H), 7.16 – 6.69 (comp, 8.36H), 6.69 – 6.60 (comp, 1.18H), 6.53 (s,

1H), 5.31 – 5.13 (comp, 2.34H), 3.85 (s, 0.52H), 3.81 (s, 3.00H), 2.36 (s, 0.52H), 2.11 (s, 3H); <sup>13</sup>C NMR (100 MHz, CDCl<sub>3</sub>) (δ, ppm) 158.0, 153.1, 133.5, 132.1, 131.6, 131.5, 131.0, 129.8, 128.9, 128.7, 128.1, 126.3, 124.9, 124.1, 122.7, 121.9, 121.4, 120.9, 120.0, 119.9, 119.8, 118.3, 118.3, 118.2, 117.5, 115.7, 111.4, 111.1, 110.5, 107.5, 68.3, 66.2, 65.5, 55.5, 29.8, 20.0; HRMS (TOF MS ESI<sup>+</sup>) calculated for C<sub>23</sub>H<sub>19</sub>NO<sub>2</sub>Na [M+Na]<sup>+</sup>: 364.1313, found 364.1306.

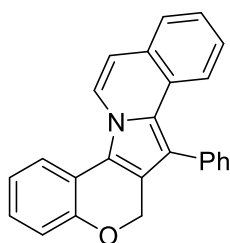

**7-Phenyl-6H-chromeno[3',4':4,5]pyrrolo[2,1-a]isoquinoline (3v).** 50.0 mg, 72% yield. Yellow solid, mp = 120-121 °C; <sup>1</sup>H NMR (400 MHz, CDCl<sub>3</sub>) (δ, ppm) 8.36 (d, *J* = 7.5 Hz, 1H), 7.76 – 7.71 (m, 2H), 7.57 – 7.55 (m, 1H), 7.52 – 7.41 (comp, 5H), 7.32 – 7.28 (m, 1H), 7.20 – 7.14 (m, 2H), 7.12 – 7.07 (m, 2H), 6.88 (d, *J* = 7.5 Hz, 1H), 5.21 (s, 2H); <sup>13</sup>C NMR (100 MHz, CDCl<sub>3</sub>) (δ, ppm) 153.6, 135.6, 130.5, 129.0, 127.5, 127.4, 127.2, 127.1, 126.98, 126.96, 125.8, 122.9, 122.5, 122.1, 120.9, 120.3, 119.4, 118.1, 117.9, 115.5, 112.1, 65.0; HRMS (TOF MS ESI<sup>+</sup>) calculated for C<sub>25</sub>H<sub>17</sub>NONa [M+Na]<sup>+</sup>: 370.1208, found 370.1200.

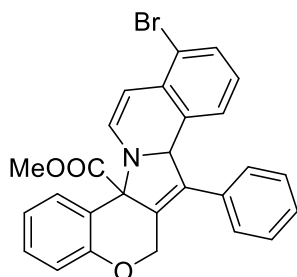

**Methyl 11-bromo-7-phenyl-6,7a-dihydro-14aH-chromeno[3',4':4,5]pyrrolo[2,1-a]isoquinoline-14a-carboxylate (3w).** 74.9 mg, 77% yield. Yellow solid, mp = 138-139 °C; <sup>1</sup>H NMR (400 MHz, CDCl<sub>3</sub>) (δ, ppm) 7.47 – 7.38 (comp, 4H), 7.32 – 7.23 (comp, 4H), 7.03 – 6.93 (comp, 3H), 6.61 (t, *J* = 7.8 Hz, 1H), 6.36 (d, *J* = 7.6 Hz, 1H), 6.11 (d, *J* = 7.6 Hz, 1H), 5.91 (d, *J* = 2.8 Hz, 1H), 5.08 – 4.94 (m, 2H), 3.83 (s, 3H);

$^{13}\text{C}$  NMR (100 MHz,  $\text{CDCl}_3$ ) ( $\delta$ , ppm) 171.1, 154.3, 138.3, 134.3, 133.6, 133.2, 131.2, 130.7, 130.0, 129.1, 128.7, 128.2, 126.7, 125.9, 123.5, 123.3, 121.5, 119.1, 118.0, 102.5, 72.0, 69.3, 62.6, 53.4; HRMS (TOF MS  $\text{ESI}^+$ ) calculated for  $\text{C}_{27}\text{H}_{20}\text{BrNO}_3\text{Na}$   $[\text{M}+\text{Na}]^+$ : 508.0524, found 508.0511.

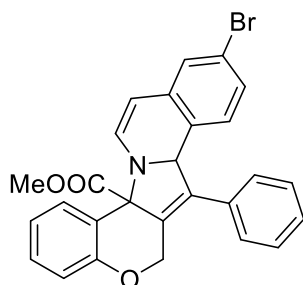

**Methyl 10-bromo-7-phenyl-6,7a-dihydro-14aH-chromeno[3',4':4,5]pyrrolo[2,1-a]isoquinoline-14a-carboxylate (3x).** 71.0 mg, 73% yield. Yellow solid, mp = 135-136°C;  $^1\text{H}$  NMR (400 MHz,  $\text{CDCl}_3$ ) 7.44 – 7.34 (comp, 4H), 7.27 – 7.19 (comp, 3H), 7.09 (d,  $J$  = 2.1 Hz, 1H), 6.95 – 6.89 (comp, 3H), 6.85 – 6.82 (m, 1H), 6.20 (d,  $J$  = 8.2 Hz, 1H), 5.84 (d,  $J$  = 2.8 Hz, 1H), 5.64 (d,  $J$  = 7.4 Hz, 1H), 5.03 – 4.90 (m, 2H), 3.79 (s, 3H);  $^{13}\text{C}$  NMR (100 MHz,  $\text{CDCl}_3$ ) ( $\delta$ , ppm) 171.2, 154.3, 138.5, 136.0, 133.7, 133.6, 130.5, 130.0, 129.1, 128.7, 128.2, 127.6, 127.0, 126.7, 126.0, 125.9, 123.3, 121.4, 121.2, 118.1, 72.1, 68.7, 62.6, 53.3; HRMS (TOF MS  $\text{ESI}^+$ ) calculated for  $\text{C}_{27}\text{H}_{20}\text{BrNO}_3\text{Na}$   $[\text{M}+\text{Na}]^+$ : 508.0524, found 508.0526.

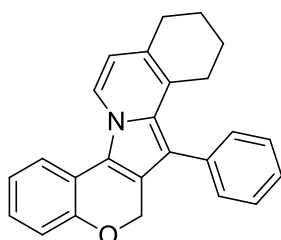

**7-Phenyl-8,9,10,11-tetrahydro-6H-chromeno[3',4':4,5]pyrrolo[2,1-a]isoquinoline (3y).** 35.1 mg, 50% yield. Yellow solid, mp = 122-123°C;  $^1\text{H}$  NMR (400 MHz,  $\text{CDCl}_3$ ) ( $\delta$ , ppm) 8.32 (s, 1H), 7.67 (d,  $J$  = 6.9 Hz, 1H), 7.43 – 7.28 (comp, 5H), 7.09 – 7.03 (comp, 3H), 6.41 (d,  $J$  = 7.1 Hz, 1H), 5.17 (s, 2H), 2.68 (s, 2H), 2.34 (t,  $J$  = 6.3 Hz, 2H), 1.79 – 1.73 (m, 2H), 1.65 – 1.57 (m, 2H);  $^{13}\text{C}$  NMR (100 MHz,  $\text{CDCl}_3$ ) ( $\delta$ , ppm) 153.0, 136.1, 134.5, 131.4, 131.3, 127.6, 127.4, 126.6, 126.1, 122.2, 122.0, 120.9,

119.8, 119.7, 117.6, 114.3, 111.3, 65.2, 29.1, 27.5, 22.8, 22.6; HRMS (TOF MS ESI<sup>+</sup>) calculated for C<sub>25</sub>H<sub>22</sub>NO [M+H]<sup>+</sup>: 352.1701, found 352.1710.

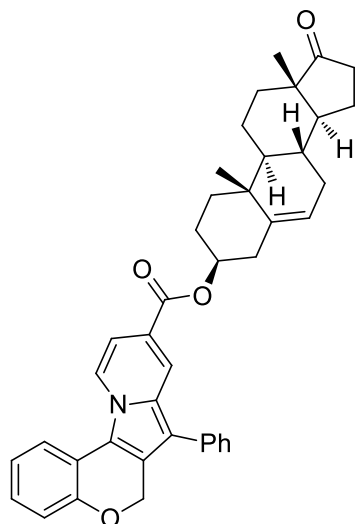

**(3*S*,8*R*,9*S*,10*R*,13*S*,14*S*)-10,13-Dimethyl-17-oxo-2,3,4,7,8,9,10,11,12,13,14,15,16,17-tetradecahydro-1*H*-cyclopenta[*a*]phenanthren-3-yl 7-phenyl-6*H*-chromeno[3,4-*b*]indolizine-9-carboxylate (3A).** 77.0 mg, 63% yield. Yellow solid, mp =145-146 °C; <sup>1</sup>H NMR (400 MHz, CDCl<sub>3</sub>) (δ, ppm) 8.42 (d, *J* = 7.5 Hz, 1H), 8.39 (d, *J* = 1.8 Hz, 1H), 7.74 – 7.72 (m, 1H), 7.53 – 7.49 (comp, 2H), 7.43 – 7.35 (comp, 3H), 7.27 – 7.22 (m, 1H), 7.22 – 7.18 (m, 1H), 7.16 – 7.04 (m, 2H), 5.43 (s, 2H), 4.91 – 4.78 (m, 1H), 2.52 – 2.43 (m, 2H), 2.19 – 2.00 (comp, 3H), 1.97 – 1.81 (comp, 3H), 1.72 – 1.64 (comp, 3H), 1.55 – 1.41 (m, 2H), 1.39 – 1.21 (comp, 7H), 1.09 (s, 3H), 0.89 (s, 3H); <sup>13</sup>C NMR (100 MHz, CDCl<sub>3</sub>) (δ, ppm) 165.3, 153.8, 140.1, 133.3, 131.0, 129.2, 129.1, 127.8, 127.0, 122.3, 122.2, 122.1, 122.0, 121.9, 120.6, 119.3, 119.0, 118.7, 118.0, 116.3, 111.5, 74.6, 64.9, 51.8, 50.2, 47.6, 38.3, 37.1, 36.9, 35.9, 31.6, 31.5, 30.9, 27.9, 22.0, 20.5, 19.5, 13.7; HRMS (TOF MS ESI<sup>+</sup>) calculated for C<sub>41</sub>H<sub>41</sub>NO<sub>4</sub>Na [M+Na]<sup>+</sup>: 634.2933, found 634.2950.

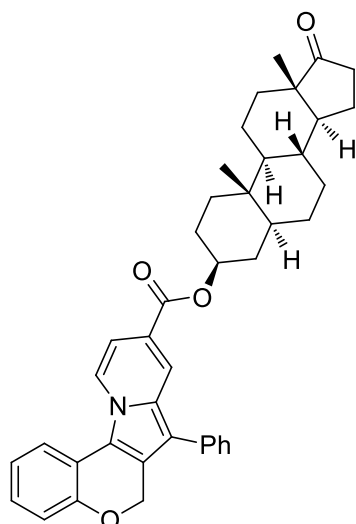

**(3*S*,5*S*,8*R*,9*S*,10*S*,13*S*,14*S*)-10,13-Dimethyl-17-oxohexadecahydro-1*H*-cyclopenta[*a*]phenanthren-3-yl 7-phenyl-6*H*-chromeno[3,4-*b*]indolizine-9-carboxylate (3B).**

68.7 mg, 56% yield. Yellow solid, mp =93-94 °C; <sup>1</sup>H NMR (400 MHz, CDCl<sub>3</sub>) (δ, ppm) 8.44 (d, *J* = 7.4 Hz, 1H), 8.38 (d, *J* = 1.9 Hz, 1H), 7.75 – 7.73 (m, 1H), 7.53 – 7.49 (m, 2H), 7.42 – 7.36 (comp, 3H), 7.25 (d, *J* = 6.4 Hz, 1H), 7.22 – 7.18 (m, 1H), 7.16 – 7.08 (m, 2H), 5.44 (s, 2H), 4.89 – 4.80 (m, 1H), 2.52 – 2.43 (m, 1H), 2.13 – 2.02 (m, 1H), 1.98–1.90 (m, 2H), 1.82 – 1.76 (comp, 3H), 1.73 – 1.62 (comp, 3H), 1.61 – 1.45 (comp, 4H), 1.36 – 1.32 (m, 2H), 1.25 (s, 3H), 1.16 – 1.07 (m, 1H), 1.06 – 0.97 (m, 1H), 0.90 (s, 3H), 0.87 (s, 3H); <sup>13</sup>C NMR (100 MHz, CDCl<sub>3</sub>) (δ, ppm) 165.5, 153.8, 133.4, 131.1, 129.3, 129.2, 127.9, 127.0, 122.3, 122.2, 122.0, 121.9, 120.6, 119.5, 119.0, 118.8, 118.0, 116.3, 111.5, 74.4, 64.9, 54.5, 51.5, 47.9, 44.9, 36.9, 36.0, 35.9, 35.2, 34.2, 31.7, 31.0, 28.5, 27.7, 21.9, 20.6, 14.0, 12.5; HRMS (TOF MS ESI<sup>+</sup>) calculated for C<sub>41</sub>H<sub>43</sub>NO<sub>4</sub>Na [M+Na]<sup>+</sup>: 636.3090, found 636.3084.

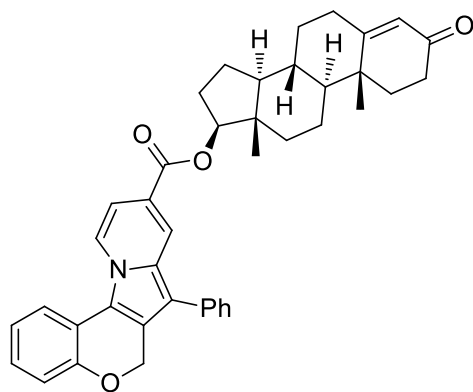

**(8*R*,9*S*,10*R*,13*S*,14*S*,17*S*)-10,13-Dimethyl-3-oxo-2,3,6,7,8,9,10,11,12,13,14,15,16,17-tetradecahydro-1*H*-cyclopenta[*a*]phenanthren-17-yl 7-phenyl-6*H*-chromeno[3,4-*b*]indolizine-9-carboxylate (3C).** 74.6 mg, 61% yield. Yellow solid, mp = 99-100 °C; <sup>1</sup>H NMR (400 MHz, CDCl<sub>3</sub>) (δ, ppm) 8.50 – 8.38 (m, 2H), 7.76 – 7.74 (m, 1H), 7.51 (t, *J* = 7.6 Hz, 2H), 7.44 – 7.36 (comp, 3H), 7.26 – 7.18 (m, 2H), 7.16 – 7.08 (m, 2H), 5.75 (d, *J* = 1.6 Hz, 1H), 5.45 (s, 2H), 4.87–4.83 (m, 1H), 2.43 – 2.36 (comp, 3H), 2.33 – 2.18 (comp, 3H), 2.05 – 2.00 (m, 1H), 1.91 – 1.86 (m, 2H), 1.75 – 1.65 (comp, 3H), 1.64 – 1.57 (m, 2H), 1.46 – 1.39 (m, 2H), 1.31 – 1.23 (comp, 3H), 1.21 (s, 3H), 0.98 (s, 3H); <sup>13</sup>C NMR (100 MHz, CDCl<sub>3</sub>) (δ, ppm) 199.6, 171.1, 165.7, 153.8, 133.3, 131.0, 129.13, 129.14, 127.9, 127.0, 124.1, 122.3, 122.2, 122.0, 120.6, 119.2, 119.1, 118.7, 118.0, 116.4, 111.4, 83.1, 64.9, 53.8, 50.4, 43.0, 38.7, 36.9, 35.8, 35.5, 34.0, 32.9, 31.6, 27.9, 23.7, 20.7, 17.5, 12.4; HRMS (TOF MS ESI<sup>+</sup>) calculated for C<sub>41</sub>H<sub>41</sub>NO<sub>4</sub>Na [M+Na]<sup>+</sup>: 634.2933, found 634.2930.

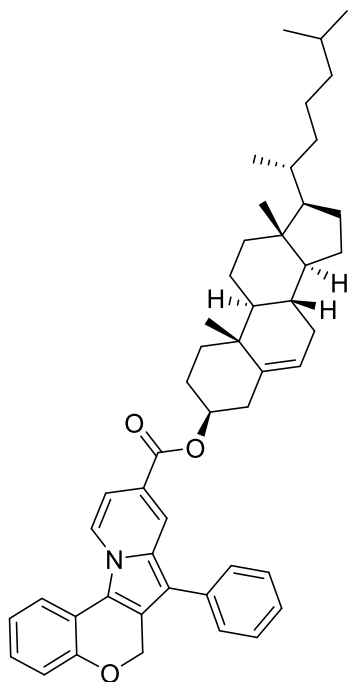

**(3*S*,8*S*,9*S*,10*R*,13*R*,14*S*,17*R*)-10,13-Dimethyl-17-((*R*)-6-methylheptan-2-yl)-2,3,4,7,8,9,10,11,12,13,14,15,16,17-tetradecahydro-1*H*-cyclopenta[*a*]phenanthren-3-yl 7-phenyl-6*H*-chromeno[3,4-*b*]indolizine-9-carboxylate (3D).** 82.4 mg, 58% yield. Yellow solid, mp = 164-165 °C; <sup>1</sup>H NMR (400 MHz, CDCl<sub>3</sub>) (δ, ppm) 8.40 – 8.37 (m, 2H), 7.70 (d, *J* = 7.5 Hz, 1H), 7.50 (t, *J* = 7.6 Hz, 2H), 7.40 – 7.34 (comp, 3H), 7.24 – 7.22 (m, 1H), 7.20 – 7.15 (m, 1H), 7.11 – 7.06 (m, 2H), 5.41 (s, 2H), 4.86 – 4.80 (m, 1H), 2.45 (d, *J* = 7.3 Hz, 2H), 2.03 – 1.94 (comp, 3H), 1.92 – 1.87 (m, 1H), 1.74 – 1.66 (m, 1H), 1.61 – 1.39 (comp, 6H), 1.38 – 1.29 (comp, 4H), 1.29 – 1.22 (m, 3H), 1.16 – 1.10 (comp, 5H), 1.07 – 1.05 (comp, 4H), 1.02 – 0.95 (comp, 3H), 0.91 (d, *J* = 6.5 Hz, 3H), 0.88 – 0.86 (comp, 6H), 0.68 (s, 3H); <sup>13</sup>C NMR (100 MHz, CDCl<sub>3</sub>) (δ, ppm) 165.3, 153.8, 139.8, 133.3, 131.0, 129.2, 129.1, 127.8, 126.9, 122.9, 122.2, 122.1, 122.0, 121.8, 120.6, 119.5, 118.9, 118.7, 117.9, 116.3, 111.5, 74.8, 64.9, 56.8, 56.3, 50.2, 42.4, 39.9, 39.6, 38.4, 36.8, 36.3, 35.9, 32.1, 32.0, 28.4, 28.1, 28.0, 24.4, 24.0, 23.0, 22.7, 21.2, 19.5, 18.8, 12.0; HRMS (TOF MS ESI<sup>+</sup>) calculated for C<sub>49</sub>H<sub>60</sub>NO<sub>3</sub>[M+H]<sup>+</sup>: 710.4573, found 710.4571.

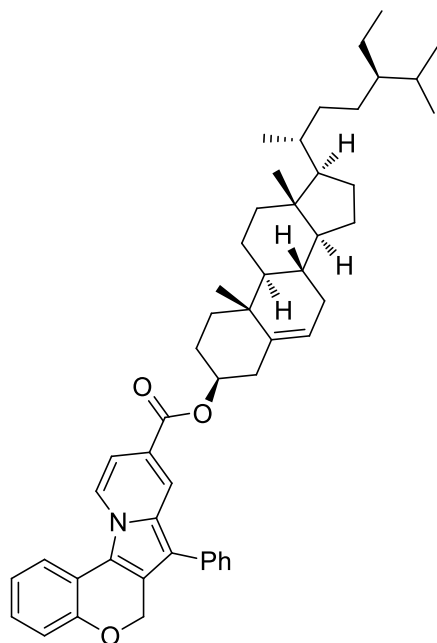

**(3S,8S,9S,10R,13R,14S,17R)-17-((2R,5R)-5-Ethyl-6-methylheptan-2-yl)-10,13-dimethyl-2,3,4,7,8,9,10,11,12,13,14,15,16,17-tetradecahydro-1H-cyclopenta[*a*]phenanthren-3-yl 7-phenyl-6H-chromeno[3,4-*b*]indolizine-9-carboxylate (3E).** 80.0 mg, 54% yield. Yellow solid, mp =85-86 °C; <sup>1</sup>H NMR (400 MHz, CDCl<sub>3</sub>) (δ, ppm) 8.44 (d, *J* = 7.5 Hz, 1H), 8.40–8.38 (m, 1H), 7.74 (d, *J* = 7.6 Hz, 1H), 7.52 (t, *J* = 7.6 Hz, 2H), 7.44 – 7.36 (comp, 3H), 7.27 – 7.24 (m, 2H), 7.23 – 7.18 (m, 1H), 7.16 – 7.08 (m, 2H), 5.43 (d, *J* = 4.9 Hz, 2H), 4.89–4.81 (m, 1H), 2.47 (d, *J* = 7.5 Hz, 1H), 2.05 – 1.96 (comp, 3H), 1.87 – 1.67 (comp, 4H), 1.38 – 1.21 (comp, 10H), 1.15 – 0.99 (comp, 10H), 0.96 –0.91(comp, 6H), 0.87–0.77 (comp, 11H), 0.69 (d, *J* = 5.8 Hz, 3H); <sup>13</sup>C NMR (100 MHz, CDCl<sub>3</sub>) (δ, ppm) 165.3, 153.9, 139.8, 133.4, 131.1, 129.3, 129.2, 127.8, 127.0, 122.9, 122.3, 122.2, 122.1, 121.9, 120.6, 119.5, 119.0, 118.8, 118.0, 116.3, 111.5, 74.9, 64.9, 56.8, 56.2, 50.2, 46.0, 42.5, 39.9, 38.4, 37.2, 36.8, 36.3, 34.1, 32.1, 32.0, 29.3, 28.4, 28.1, 26.2, 24.5, 23.2, 21.2, 20.0, 19.6, 19.2, 18.9, 12.1, 12.0; HRMS (TOF MS ESI<sup>+</sup>) calculated for C<sub>51</sub>H<sub>63</sub>NO<sub>3</sub>Na [M+Na]<sup>+</sup>: 760.4706, found 760.4700.

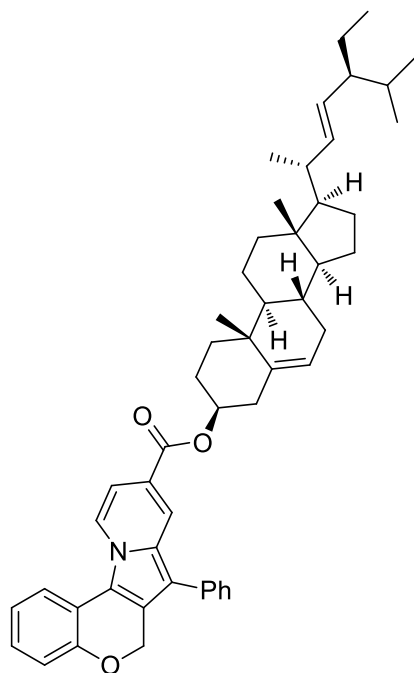

**(3*S*,8*S*,9*S*,10*R*,13*R*,14*S*,17*R*)-17-((2*R*,5*S*,*E*)-5-Ethyl-6-methylhept-3-en-2-yl)-10,13-dimethyl-2,3,4,7,8,9,10,11,12,13,14,15,16,17-tetradecahydro-1*H*-cyclopenta[*a*]phenanthren-3-yl 7-phenyl-6*H*-chromeno[3,4-*b*]indolizine-9-carboxylate (3F).** 86.9 mg, 59% yield. Yellow solid, mp = 101-102 °C; <sup>1</sup>H NMR (400 MHz, CDCl<sub>3</sub>) (δ, ppm) 8.44 (d, *J* = 7.5 Hz, 1H), 8.40 (d, *J* = 1.8 Hz, 1H), 7.76 – 7.73 (m, 1H), 7.52 (t, *J* = 7.6 Hz, 2H), 7.44 – 7.35 (comp, 3H), 7.28 – 7.24 (m, 2H), 7.22 – 7.18 (m, 1H), 7.16 – 7.08 (m, 2H), 5.44 (s, 2H), 5.19 – 5.13 (m, 1H), 5.05 – 4.99 (m, 1H), 4.88 – 4.82 (m, 1H), 2.47 (d, *J* = 8.0 Hz, 2H), 1.98 (comp, 5H), 1.72 (comp, 3H), 1.59 – 1.42 (comp, 8H), 1.33 – 1.16 (comp, 7H), 1.10 – 1.01 (comp, 7H), 0.87 – 0.79 (comp, 9H), 0.71 (s, 3H); <sup>13</sup>C NMR (100 MHz, CDCl<sub>3</sub>) (δ, ppm) 165.4, 153.8, 139.9, 138.5, 133.4, 131.1, 129.4, 129.3, 129.2, 127.9, 127.0, 122.9, 122.3, 122.2, 122.1, 121.9, 120.6, 119.5, 119.0, 118.8, 118.0, 116.4, 111.6, 74.9, 65.0, 57.0, 56.1, 51.4, 50.2, 42.4, 40.7, 39.8, 38.4, 37.2, 36.8, 32.1, 32.0, 29.1, 28.1, 25.6, 24.5, 21.4, 21.3, 21.2, 19.6, 19.2, 12.4, 12.2; HRMS (TOF MS ESI<sup>+</sup>) calculated for C<sub>51</sub>H<sub>61</sub>NO<sub>3</sub>Na [M+Na]<sup>+</sup>: 758.4549, found 758.4540.

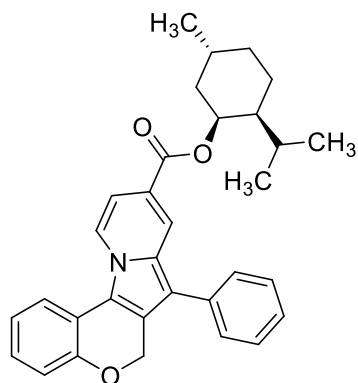

**(1*S*,2*S*,5*R*)-2-Isopropyl-5-methylcyclohexyl 7-phenyl-6*H*-chromeno[3,4-*b*]indolizine-9-carboxylate (3G).** 59.5 mg, 62% yield. Yellow solid, mp =85-86 °C; <sup>1</sup>H NMR (400 MHz, CDCl<sub>3</sub>) (δ, ppm) 8.44 – 8.41 (m, 2H), 7.74 – 7.71 (m, 1H), 7.50 (t, *J* = 7.6 Hz, 2H), 7.41 – 7.34 (comp, 3H), 7.26 – 7.24 (m, 1H), 7.21 – 7.17 (m, 1H), 7.13 – 7.07 (m, 2H), 5.43 (d, *J* = 1.2 Hz, 2H), 4.92 (td, *J* = 10.9, 4.5 Hz, 1H), 2.17 – 2.08 (m, 1H), 1.98 – 1.93 (m, 1H), 1.75 – 1.70 (m, 2H), 1.58 – 1.51 (m, 2H), 1.28 – 1.24 (m, 1H), 1.17 – 1.06 (m, 2H), 0.93 (d, *J* = 6.8 Hz, 6H), 0.83 (d, *J* = 6.9 Hz, 3H); <sup>13</sup>C NMR (100 MHz, CDCl<sub>3</sub>) (δ, ppm) 165.4, 153.8, 133.4, 131.1, 129.2, 129.1, 127.8, 127.0, 122.3, 122.14, 122.12, 121.9, 120.6, 119.5, 118.9, 118.8, 118.0, 116.3, 111.5, 75.1, 64.9, 47.4, 41.2, 34.5, 31.6, 27.0, 24.1, 22.2, 20.8, 17.0; HRMS (TOF MS ESI<sup>+</sup>) calculated for C<sub>32</sub>H<sub>33</sub>NO<sub>3</sub>Na [M+Na]<sup>+</sup>: 502.2358, found 502.2355.

## 1D-NOE NMR Analysis:

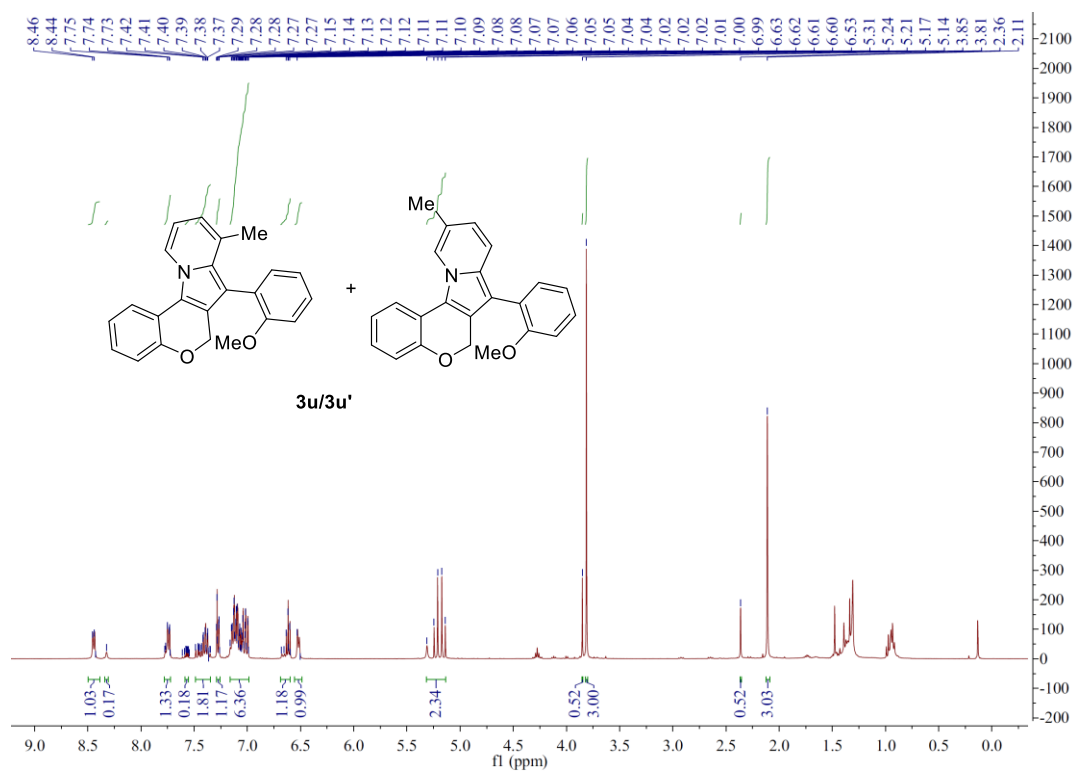

**Figure S1.** Proton NMR spectra of mixture of **3y** and **3y'**.

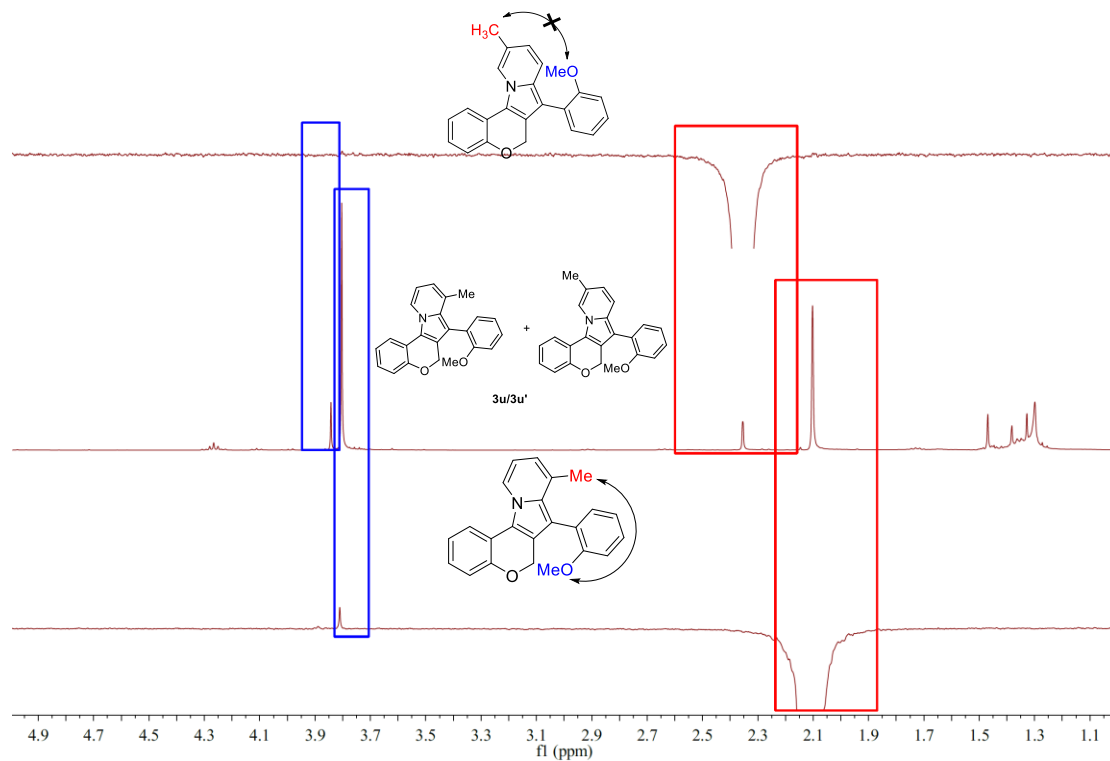

**Figure S2.** NOE NMR spectra of **3y** and **3y'**.

## Control Experiments

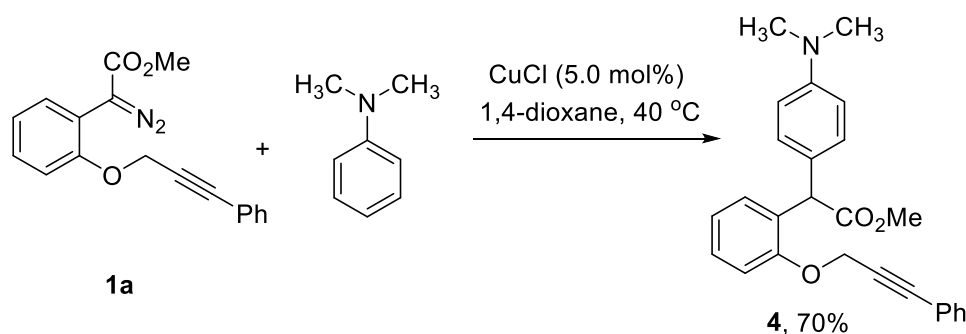

To a 10-mL oven-dried vial with a magnetic stirring bar, CuCl (1.0 mg, 5.0 mol%) and *N,N*-dimethylaniline (72.6 mg, 0.6 mmol) in freshly distilled 1,4-dioxane (1.0 mL), was added the solution of diazo **1a** (0.2 mmol) in 1,4-dioxane (1.0 mL) *via* a syringe in 1 hour at room temperature. The reaction mixture was heated at 40 °C under argon atmosphere for 18 h. After the reaction was completed, the solvent was evaporated in *vacuo*, then the crude mixture was purified by column chromatography to give product **4** as white solid, 70% yield, mp = 133.4-136.0 °C; <sup>1</sup>H NMR (400 MHz, CDCl<sub>3</sub>) (δ, ppm) 7.50 – 7.44 (comp, 2H), 7.38 – 7.32 (comp, 3H), 7.29 – 7.24 (comp, 3H), 7.09 (d, *J* = 7.7 Hz, 2H), 6.96 (t, *J* = 7.4 Hz, 1H), 6.77 (d, *J* = 7.9 Hz, 2H), 5.28 (s, 1H), 4.95 (s, 2H), 3.75 (s, 3H), 2.97 (s, 6H); <sup>13</sup>C NMR (100 MHz, CDCl<sub>3</sub>) (δ, ppm) 174.0, 155.4, 131.9, 130.0, 129.5, 129.4, 128.8, 128.4, 128.3, 122.5, 121.5, 113.0, 112.3, 87.1, 57.3, 52.3, 50.4, 40.9; HRMS (TOF MS ESI<sup>+</sup>) calculated for C<sub>26</sub>H<sub>25</sub>NO<sub>3</sub>Na [M+Na]<sup>+</sup>: 422.1727, found 422.1715.

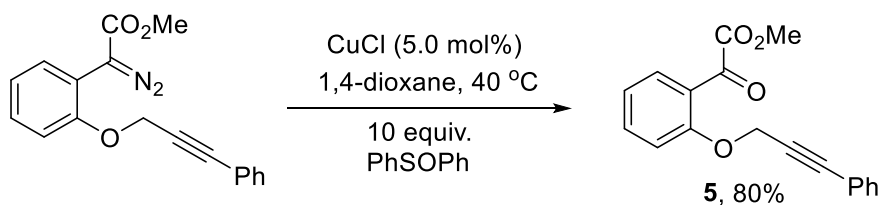

To a 10-mL oven-dried vial with a magnetic stirring bar, CuCl (1.0 mg, 5.0 mol%) and diphenyl sulfoxide (404 mg, 2.0 mmol) in freshly distilled 1,4-dioxane (1.0 mL), was added the solution of diazo **1a** (0.2 mmol) in 1,4-dioxane (1.0 mL) *via* a syringe in 1 hour at room temperature. The reaction mixture was heated at 40 °C under argon atmosphere for 18 h. After the reaction was completed, the solvent was evaporated in

*vacuo*, then the crude mixture was purified by column chromatography to give product **5** as yellow oil, 80% yield;  $^1\text{H}$  NMR (400 MHz,  $\text{CDCl}_3$ ) ( $\delta$ , ppm) 7.92 – 7.90 (m, 1H), 7.66 – 7.55 (m, 1H), 7.47 – 7.42 (comp, 2H), 7.38 – 7.29 (comp, 3H), 7.16 – 7.12 (comp, 2H), 4.96 (s, 2H), 3.94 (s, 3H);  $^{13}\text{C}$  NMR (100 MHz,  $\text{CDCl}_3$ ) ( $\delta$ , ppm) 186.4, 165.7, 158.7, 136.3, 131.9, 131.1, 129.2, 128.6, 123.6, 122.2, 122.0, 113.4, 88.2, 82.6, 58.0, 52.7; HRMS (TOF MS  $\text{ESI}^+$ ) calculated for  $\text{C}_{18}\text{H}_{14}\text{O}_4\text{Na}$   $[\text{M}+\text{Na}]^+$ : 317.0784, found 317.0780.

#### Control experiment in the presence of dimethyl but-2-ynedioate.

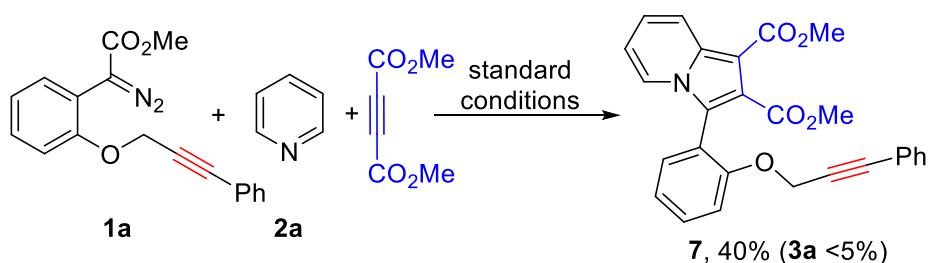

To a 10-mL oven-dried vial with a magnetic stirring bar,  $\text{CuCl}$  (1.0 mg, 5.0 mol%) and dimethyl but-2-ynedioate (142.1 mg, 1.0 mmol) in freshly distilled 1,4-dioxane (1.0 mL), was added the solution of diazo **1a** (0.2 mmol) and pyridine **2a** (0.3 mmol) in 1,4-dioxane (1.0 mL) *via* a syringe in 1 hour at room temperature. The reaction mixture was heated at 40  $^\circ\text{C}$  under argon atmosphere for 18 h, After the reaction was completed, the solvent was evaporated in *vacuo*, then the crude mixture was purified by column chromatography to give product **7** as white solid, 40% yield;  $^1\text{H}$  NMR (400 MHz,  $\text{CDCl}_3$ ) ( $\delta$ , ppm) 9.44 (d,  $J = 7.2$  Hz, 1H), 7.53 – 7.47 (m, 1H), 7.41 – 7.34 (comp, 4H), 7.32 – 7.28 (comp, 3H), 7.24 (d,  $J = 7.6$  Hz, 1H), 7.11 – 7.01 (comp, 2H), 6.91 – 6.87 (m, 1H), 4.83 (s, 2H), 3.90 (s, 3H), 3.82 (s, 3H);  $^{13}\text{C}$  NMR (100 MHz,  $\text{CDCl}_3$ ) ( $\delta$ , ppm) 167.0, 161.2, 155.3, 135.0, 132.0, 131.8, 128.9, 128.8, 128.4, 127.5, 127.4, 122.8, 122.5, 122.2, 121.7, 119.4, 114.4, 113.5, 111.7, 111.1, 87.3, 84.2, 56.8, 52.5, 51.7.

### Proton NMR observation of the reaction intermediate.

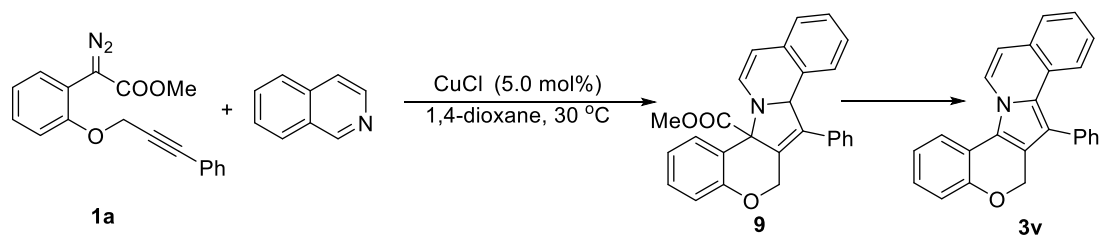

To a 10-mL oven-dried vial with a magnetic stirring bar, CuCl (1.0 mg, 5.0 mol%) in freshly distilled 1,4-dioxane (1.0 mL), was added the solution of diazo compound **1a** (61.2 mg, 0.2 mmol) and isoquinoline (38.7 mg, 0.3 mmol) in 1,4-dioxane (1.0 mL) *via* a syringe in 1 hour at room temperature under argon atmosphere. The reaction mixture was heated at 40 °C for corresponding period of time (1.0 h, 1.5 h, 24.0 h), then the reaction mixture (0.25 mL) was filtered and the filtrate was evaporated in *vacuo* and the residue was directly subjected to proton NMR analysis with CDCl<sub>3</sub> as the solvent without any further purification. See Figure S3 for these spectra.

**Discussion:** From this study, the compound **9** is confirmed as the intermediate in this transformation.

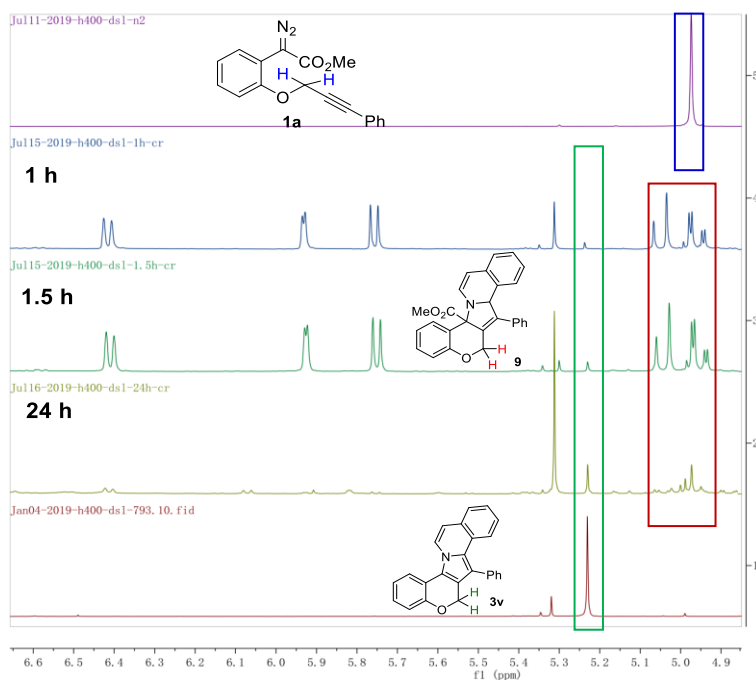

**Figure S3.** Proton NMR spectra monitoring of the reaction mixture.

## General Procedure for Scale up

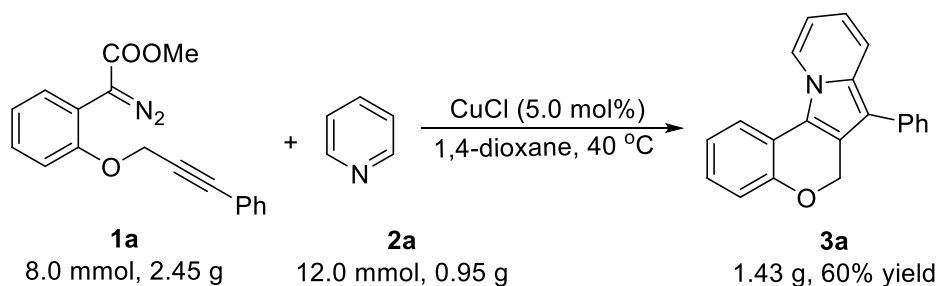

To a 50-mL oven-dried round-bottom flask with a magnetic stirring bar, diazo compound **1a** (2.45 g, 8.0 mmol), pyridine (0.95 g, 12.0 mmol), CuCl (39.6 mg, 5.0 mol%), and anhydrous 1,4-dioxane (30.0 mL) was added in sequence under atmosphere of argon, and the reaction mixture was stirred at 40 °C for 24 hours. When the reaction was completed (monitored by TLC), the most of the solvent was evaporated in *vacuo*, the reaction mixture was purified by flash column chromatography on silica gel (Hexanes : EtOAc = 50:1 to 20:1) to give 1.43 g pure **3a** (60% yield).

## Derivatizations:

### Procedure for the Preparation of **10**.<sup>1</sup>

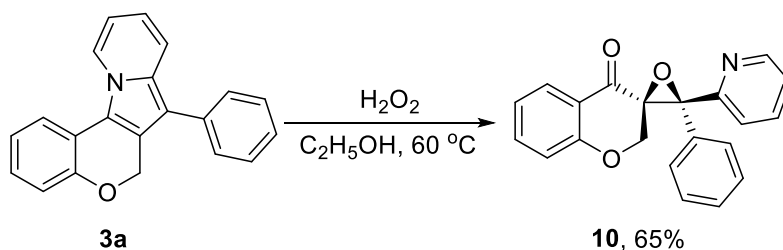

To a 10-mL oven-dried round-bottom flask with a magnetic stirring bar, **3a** (29.7 mg, 0.1 mmol), H<sub>2</sub>O<sub>2</sub> (2.0 mmol, 10.0 equiv.), and CH<sub>3</sub>CH<sub>2</sub>OH (2.0 mL) were added in sequence. Then the reaction mixture was stirred at 60 °C for 12 hours. After the reaction completed, the reaction mixture was quenched with saturated brine (10.0 mL) and extracted with EtOAc (3 × 10.0 mL). The organic phase was dried over anhydrous Na<sub>2</sub>SO<sub>4</sub> and concentrated under reduced pressure after filtration. The obtained residue was purified by flash column chromatography on silica gel (hexanes : EtOAc = 15:1 to 8:1) to give 21.4 mg pure product **10** as white solid, 65% yield, mp = 90.4 - 90.5 °C; <sup>1</sup>H NMR (400 MHz, CDCl<sub>3</sub>) (δ, ppm) 8.45 – 8.32 (m, 1H), 7.78 – 7.62

(comp, 5H), 7.52 – 7.48 (m, 1H), 7.43 – 7.33 (comp, 3H), 7.16 – 7.12 (m, 1H), 7.02 (t,  $J = 7.9$  Hz, 2H), 4.63 (d,  $J = 12.0$  Hz, 1H), 4.03 (d,  $J = 11.9$  Hz, 1H);  $^{13}\text{C}$  NMR (100 MHz,  $\text{CDCl}_3$ ) ( $\delta$ , ppm) 187.3, 161.5, 156.0, 148.6, 136.7, 136.5, 135.2, 128.9, 128.6, 127.6, 127.4, 123.0, 122.8, 122.3, 122.0, 118.3, 74.3, 68.2, 65.2; HRMS (TOF MS  $\text{ESI}^+$ ) calculated for  $\text{C}_{21}\text{H}_{15}\text{NO}_3\text{Na}$   $[\text{M}+\text{Na}]^+$ : 352.0950, found 352.0944.

### Procedure for the Preparation of **11**.<sup>2</sup>

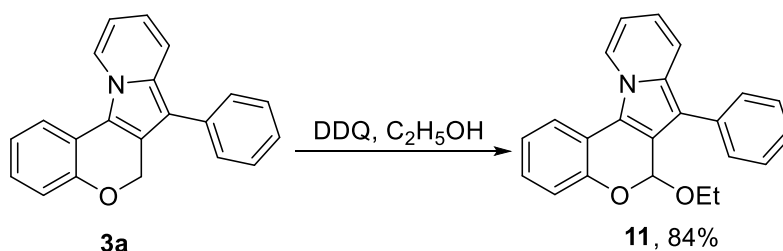

To a 10-mL oven-dried vial with a magnetic stirring bar, **3a** (29.7 mg, 0.1 mmol), DDQ (0.2 mmol, 2.0 equiv.), and anhydrous  $\text{C}_2\text{H}_5\text{OH}$  (2.0 mL) were added in sequence, and the reaction mixture was stirred for 2 hours at room temperature. When the reaction was completed (monitored by TLC), the crude reaction mixture was purified by flash column chromatography on silica gel (Hexanes : EtOAc = 50:1) to give 28.6 mg pure product **11** as yellow solid, 84% yield, mp = 122.4 -122.5 °C;  $^1\text{H}$  NMR (400 MHz,  $\text{CDCl}_3$ ) ( $\delta$ , ppm) 8.58 (d,  $J = 7.2$  Hz, 1H), 7.88 – 7.82 (m, 1H), 7.77 – 7.74 (m, 1H), 7.70 – 7.62 (m, 2H), 7.51 (t,  $J = 7.7$  Hz, 2H), 7.38 – 7.33 (m, 1H), 7.28 – 7.14 (comp, 3H), 6.84 – 6.80 (m, 1H), 6.74 – 6.71 (m, 1H), 4.11 – 4.03 (m, 1H), 3.97 – 3.81 (m, 1H), 1.29 (s, 3H);  $^{13}\text{C}$  NMR (100 MHz,  $\text{CDCl}_3$ ) ( $\delta$ , ppm) 145.0, 134.2, 132.2, 131.9, 129.3, 128.9, 126.6, 126.4, 123.7, 122.2, 120.3, 119.9, 119.1, 118.5, 118.4, 118.3, 112.5, 111.6, 95.8, 64.0, 15.41; HRMS (TOF MS  $\text{ESI}^+$ ) calculated for  $\text{C}_{23}\text{H}_{19}\text{NO}_2\text{Na}$   $[\text{M}+\text{Na}]^+$ : 364.1313, found 364.1310.

### References:

- 1 Y. He, X. Zhang, L. Cui, J. Wang and X. Fan, *Green Chem.*, **2012**, *14*, 3429.
- 2 F. Yang, Y. Li, P. E. Floreancig, X. Li and L. Liu, *Org. Biomol. Chem.*, **2018**, *16*, 5144.

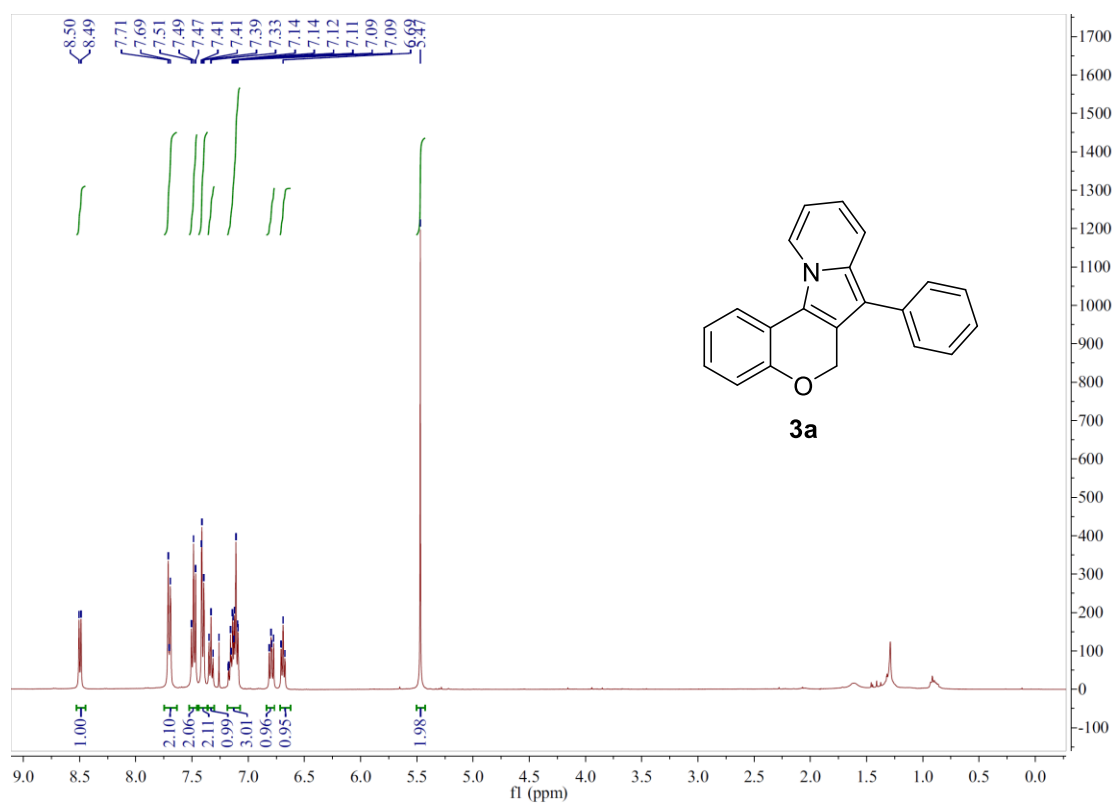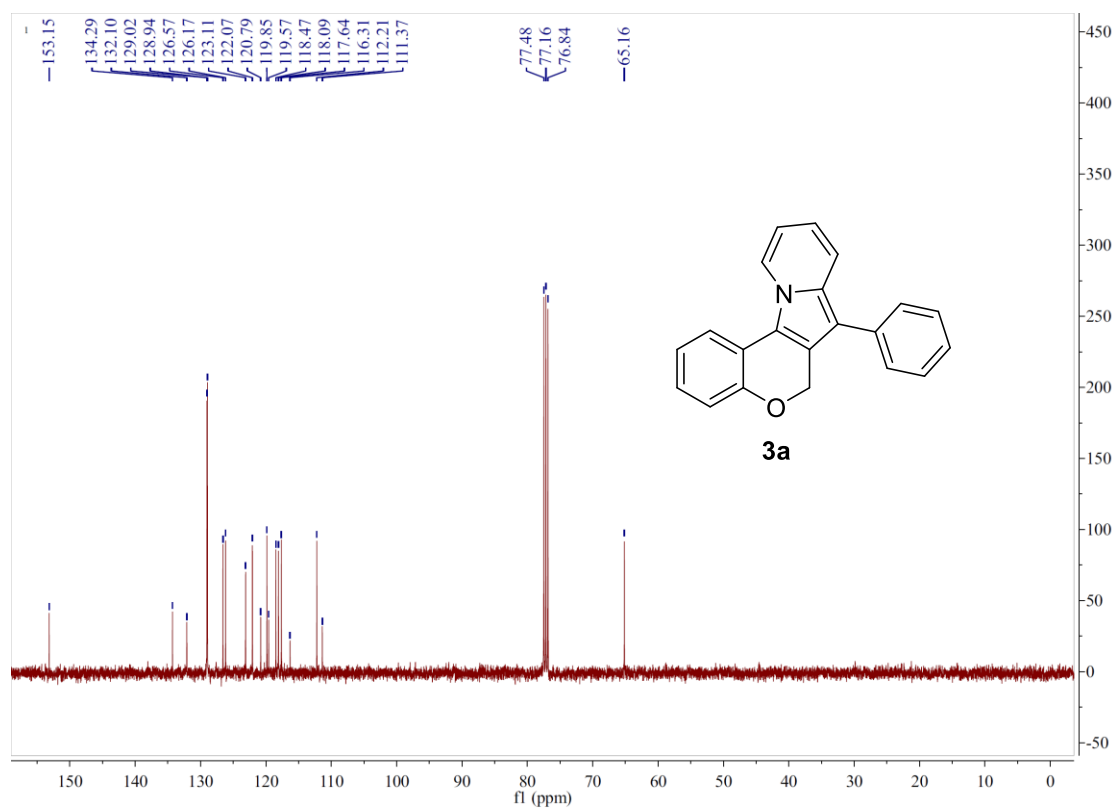

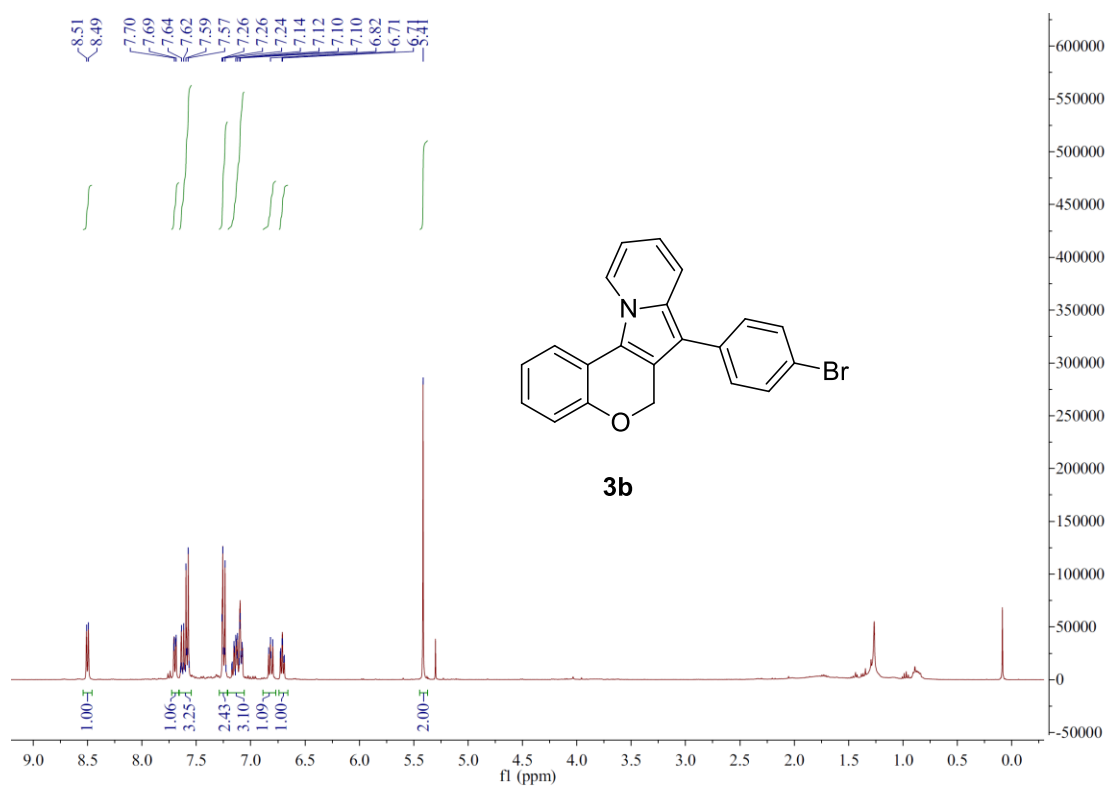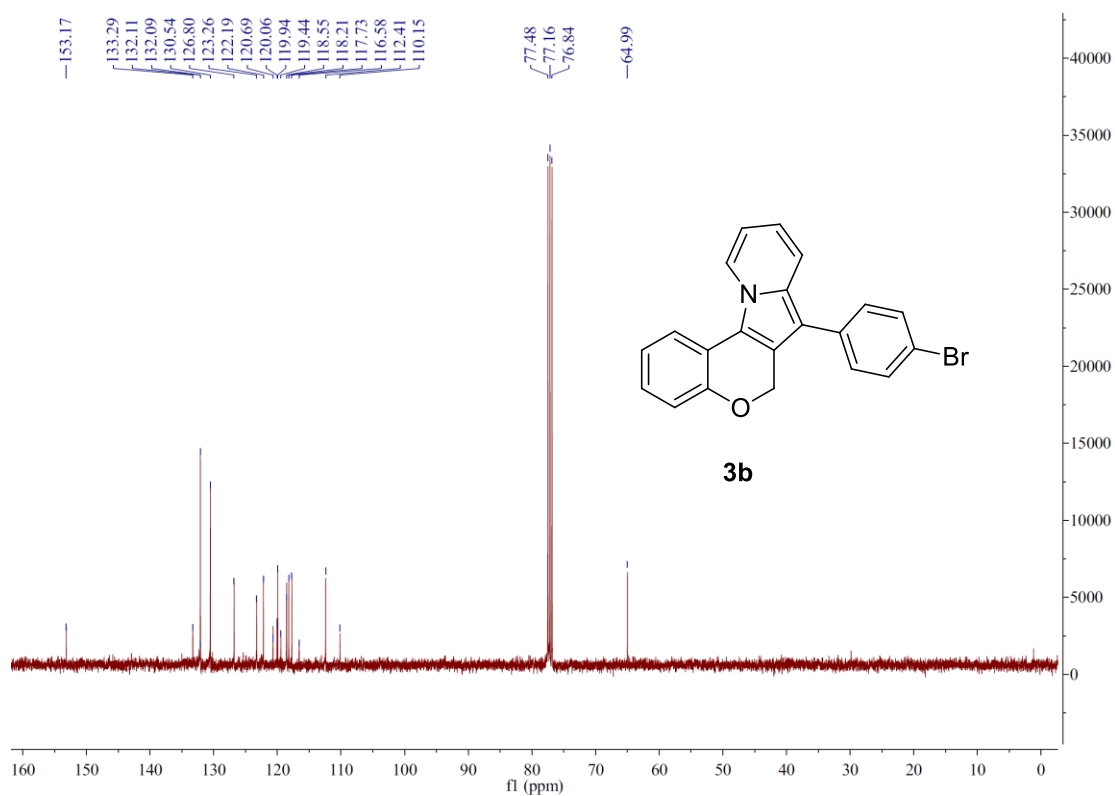

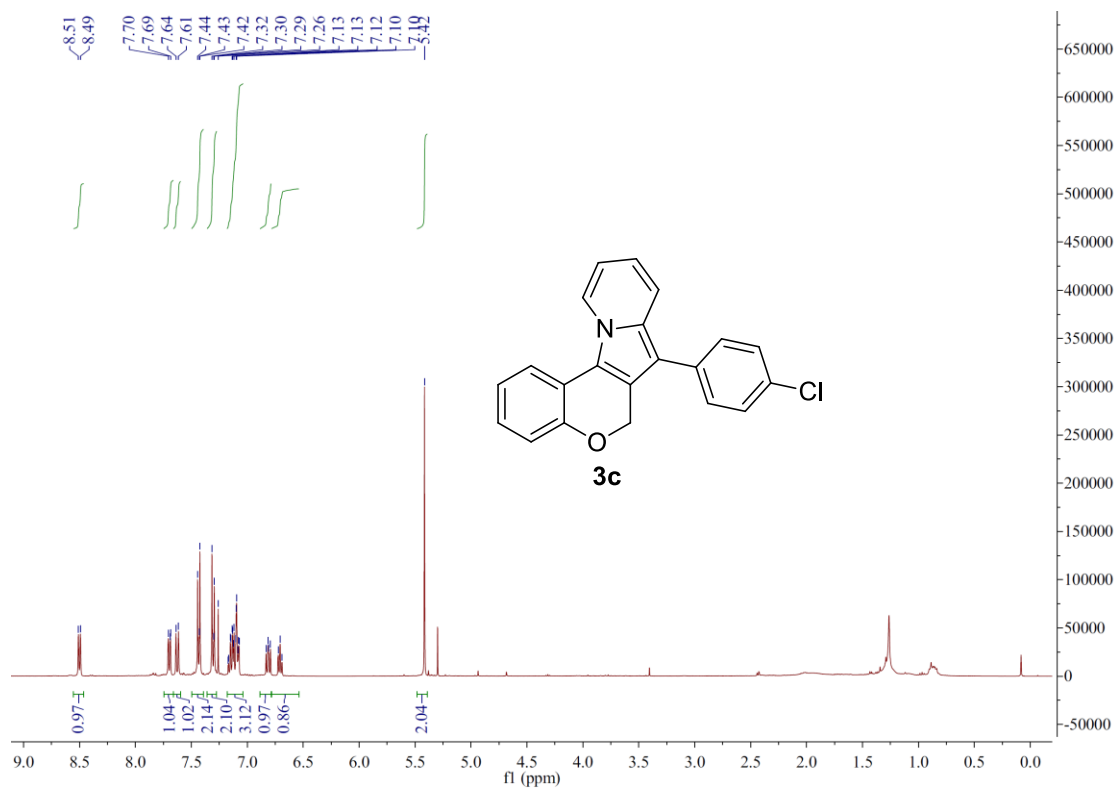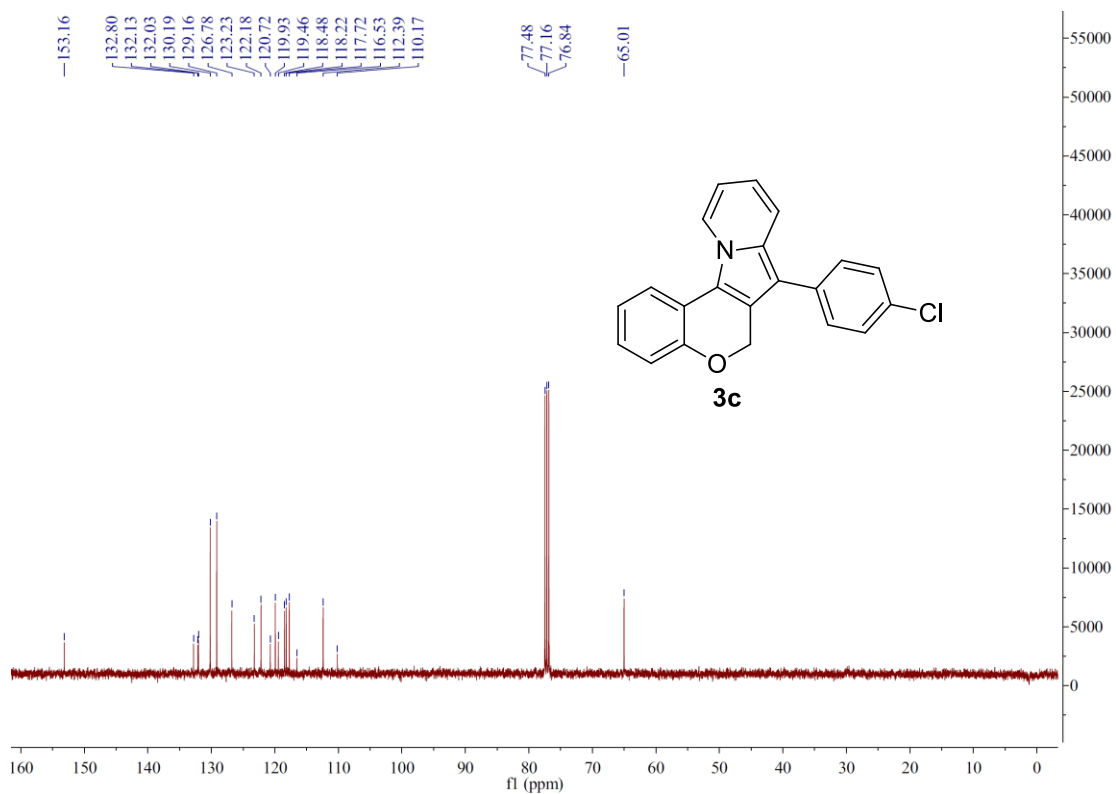

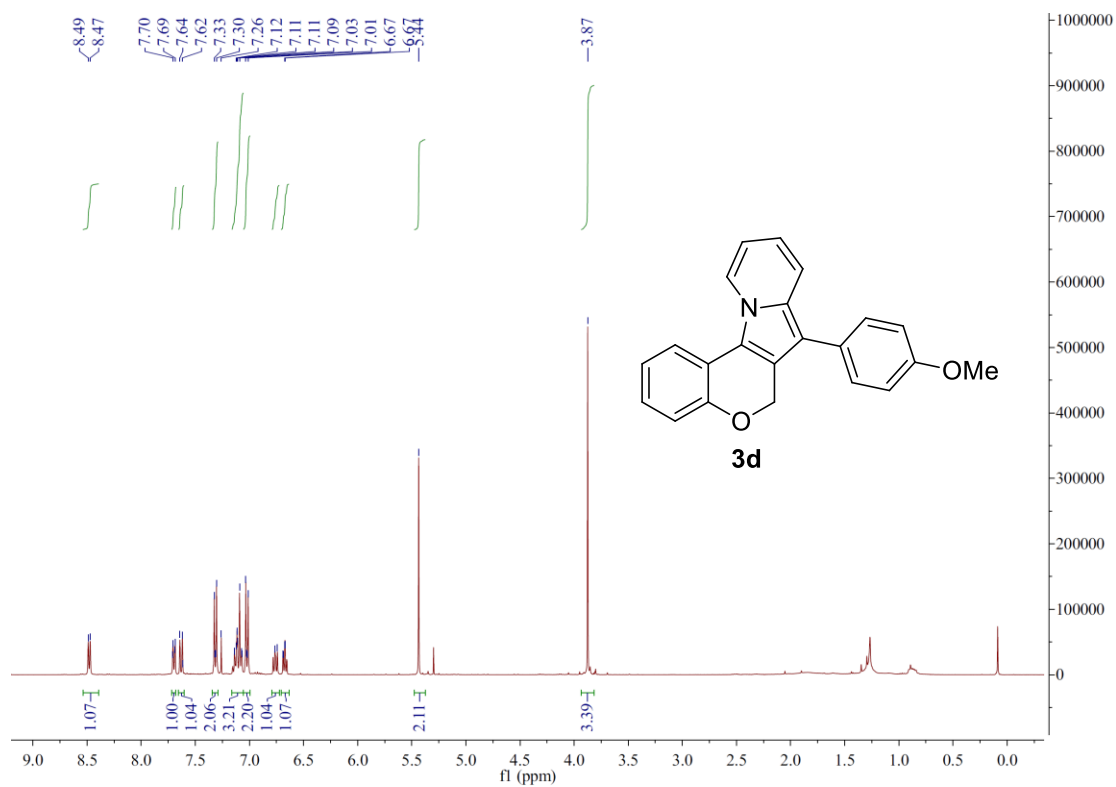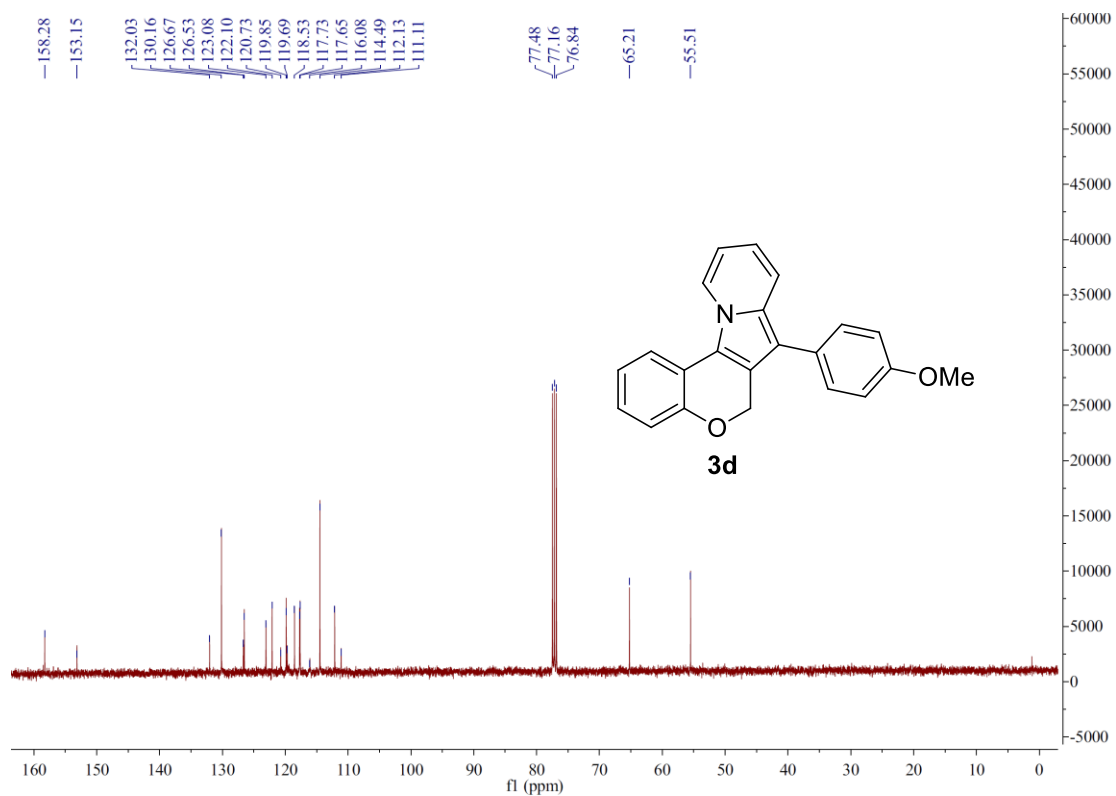

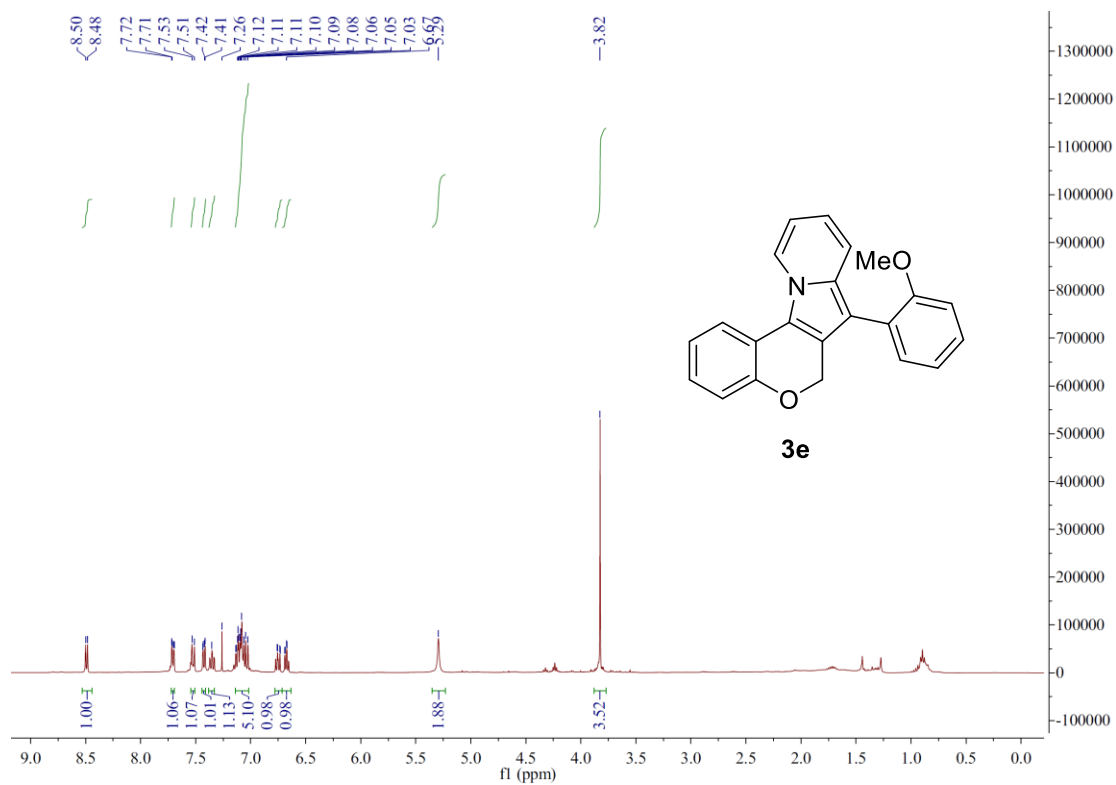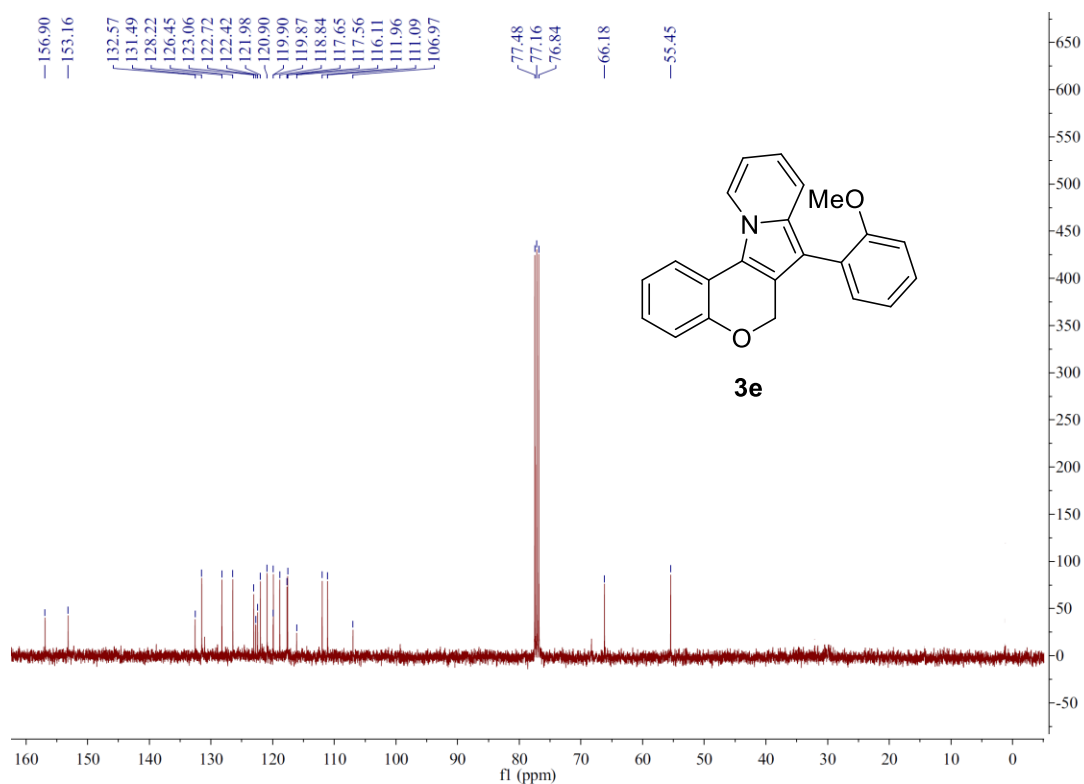

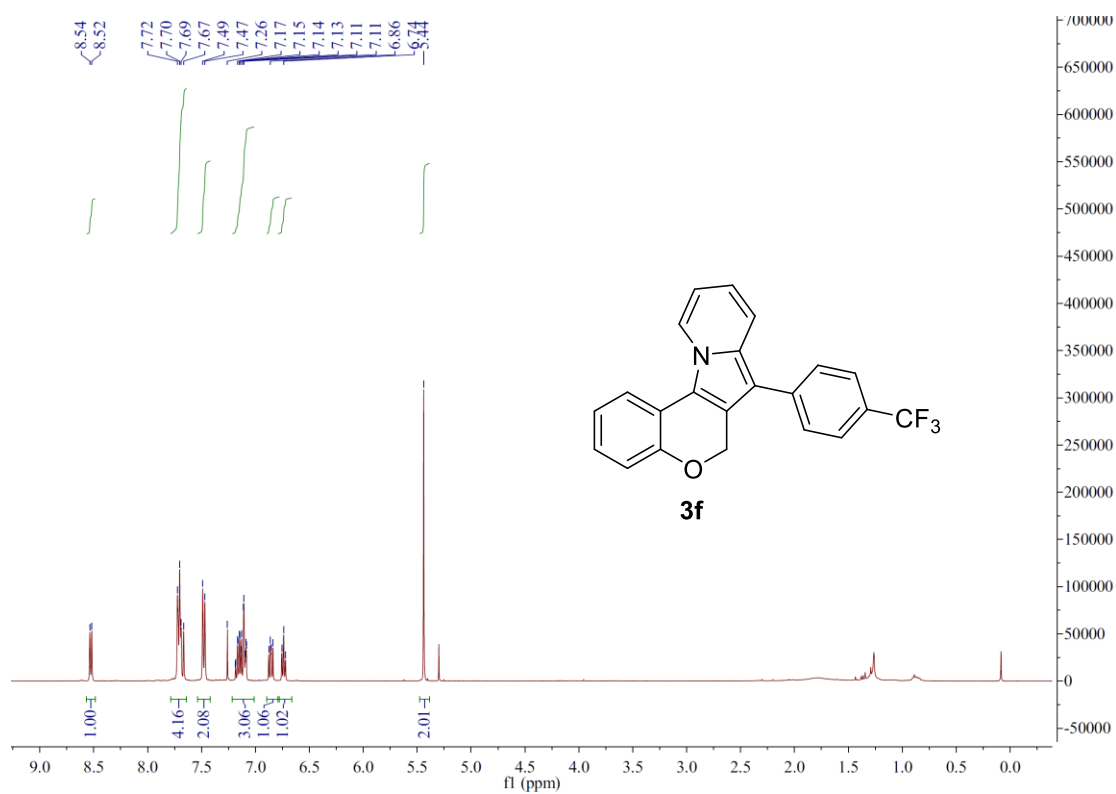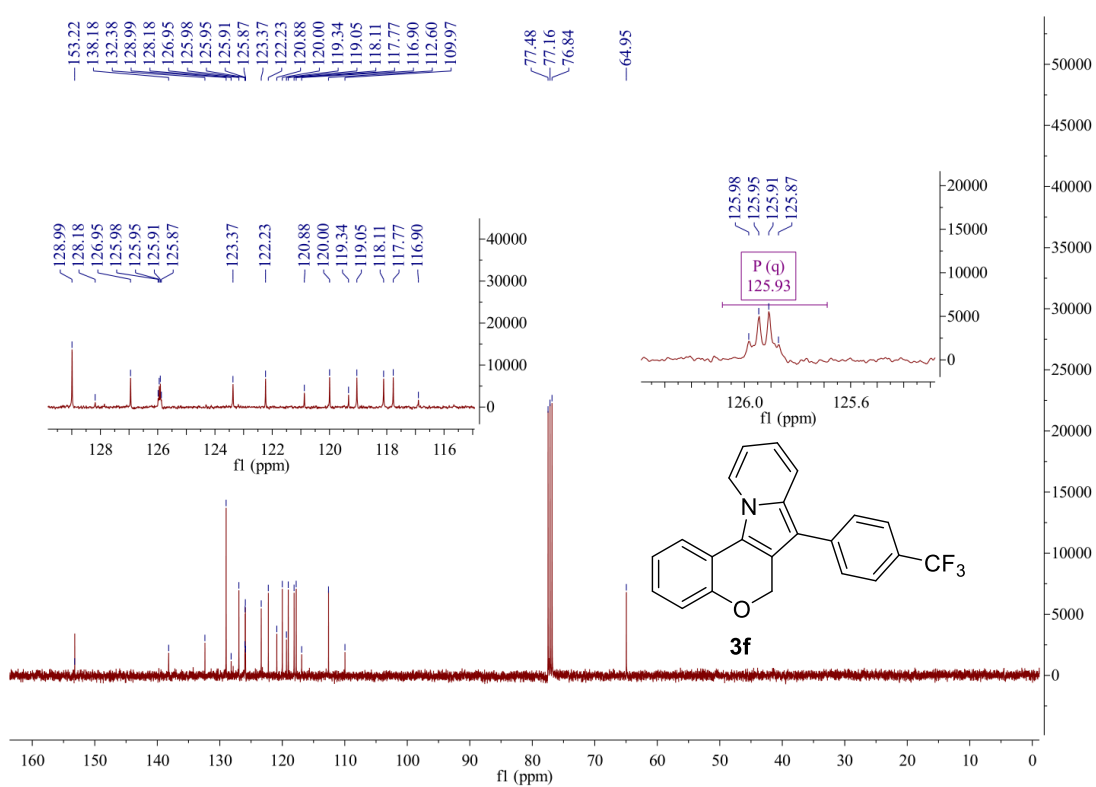

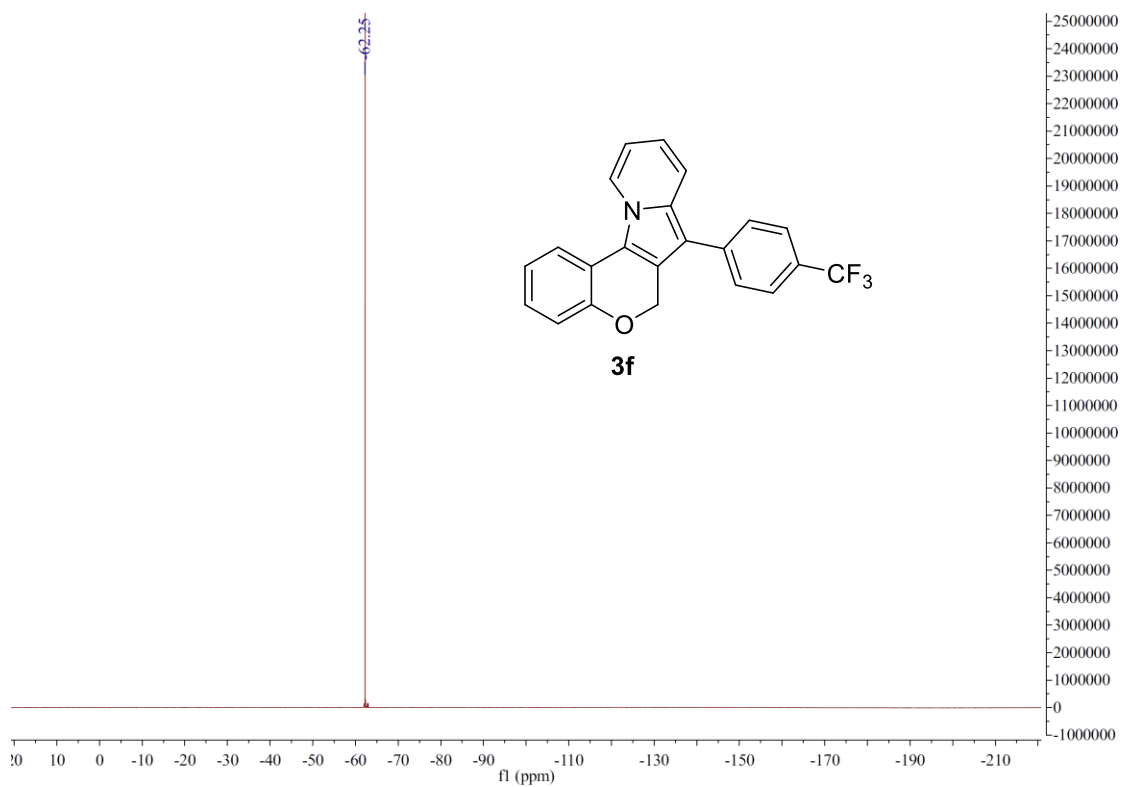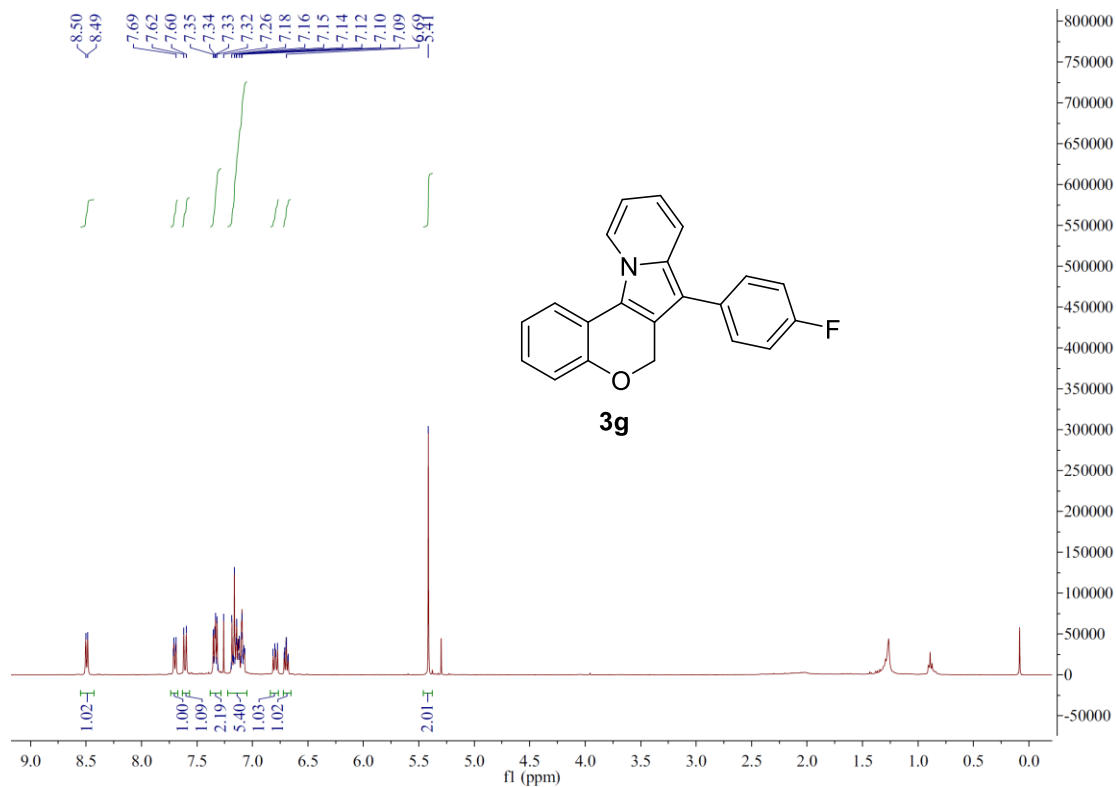

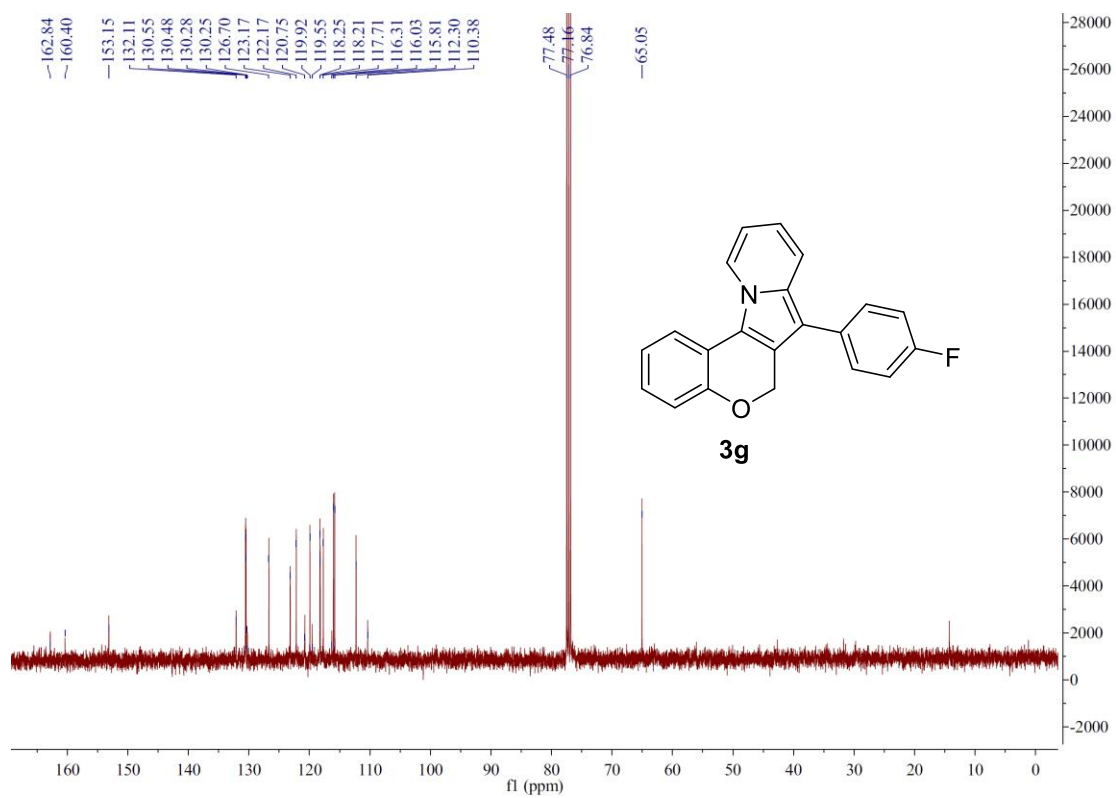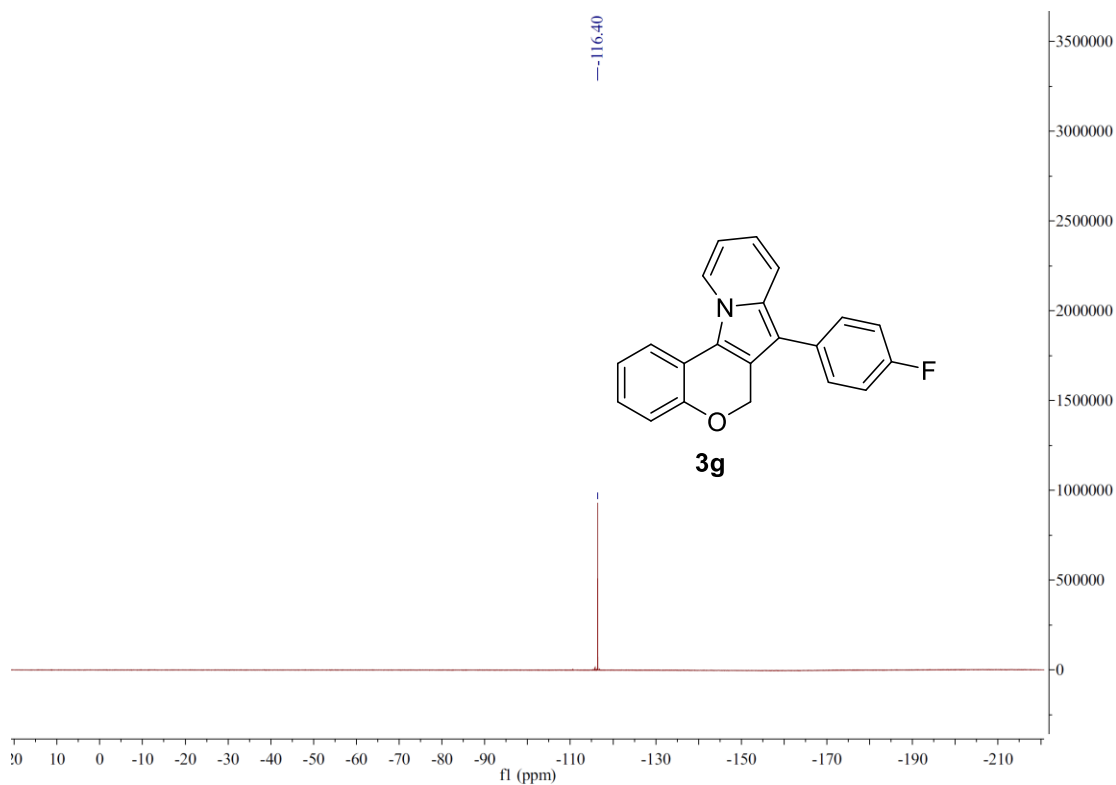

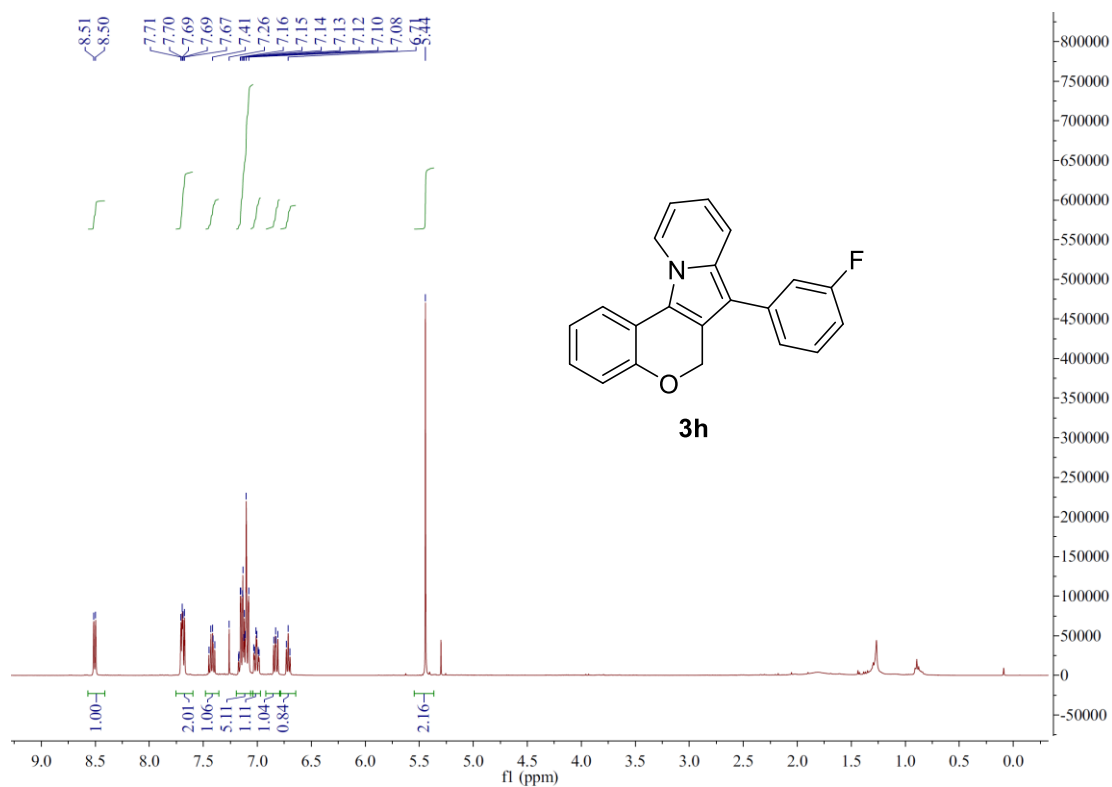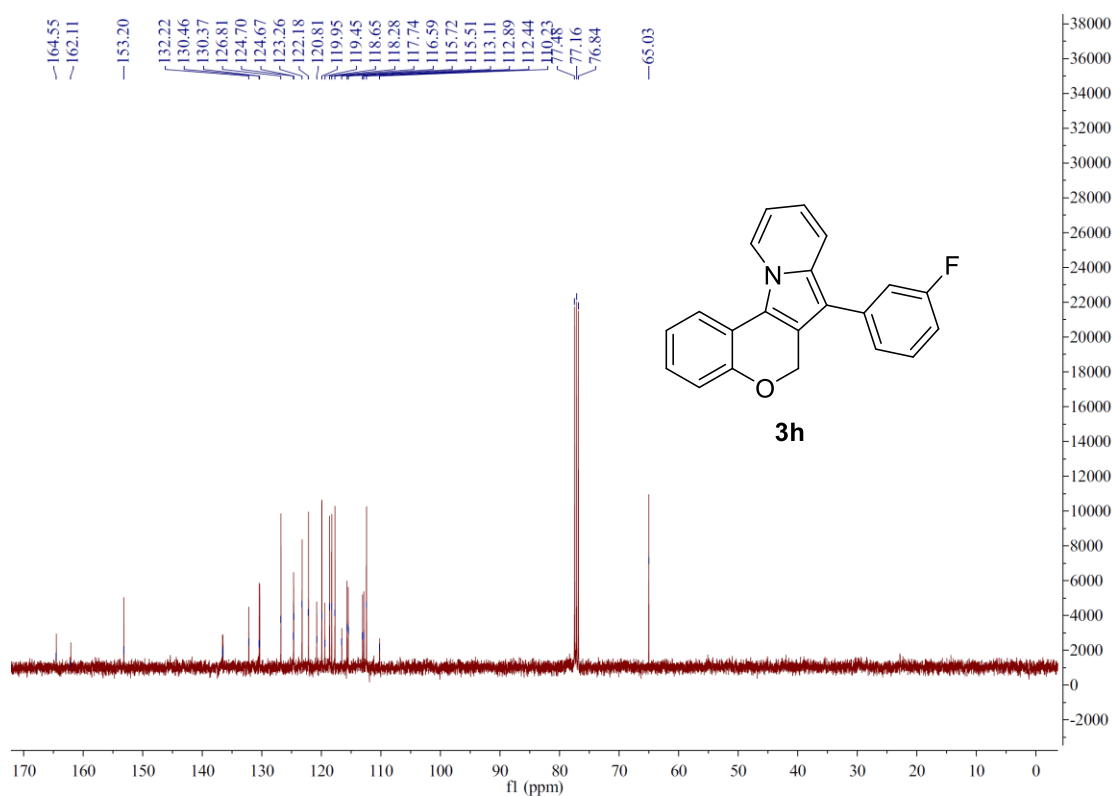

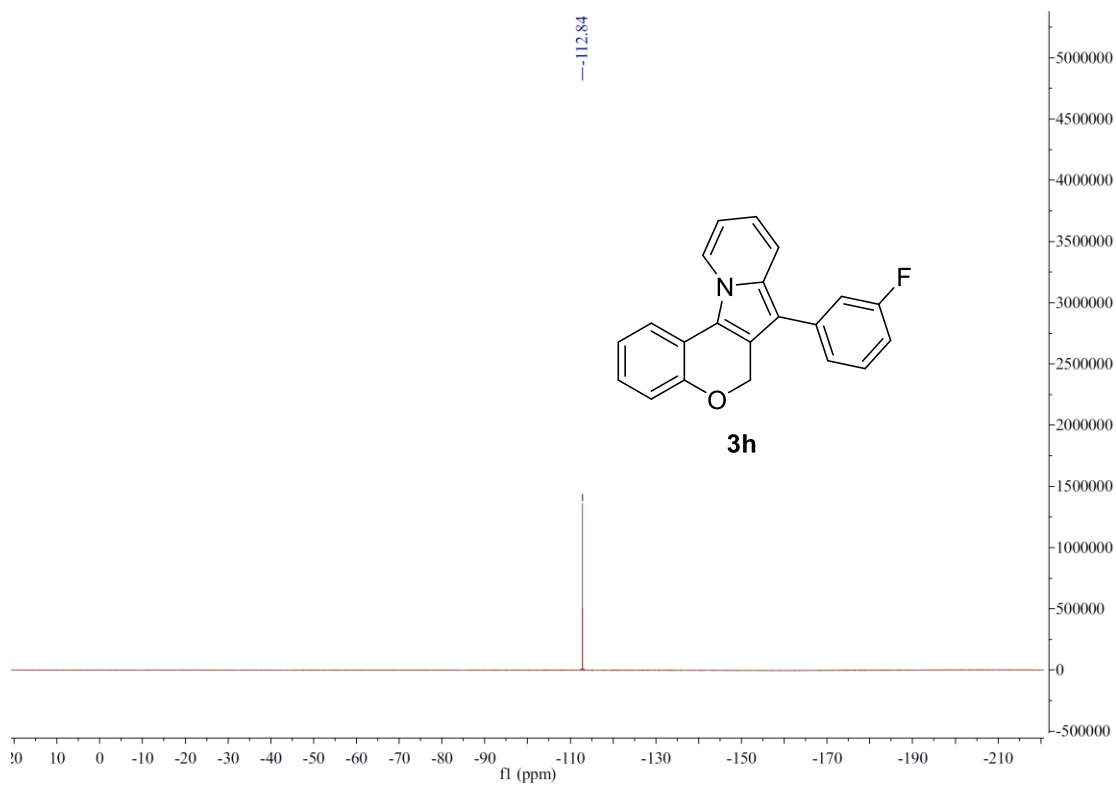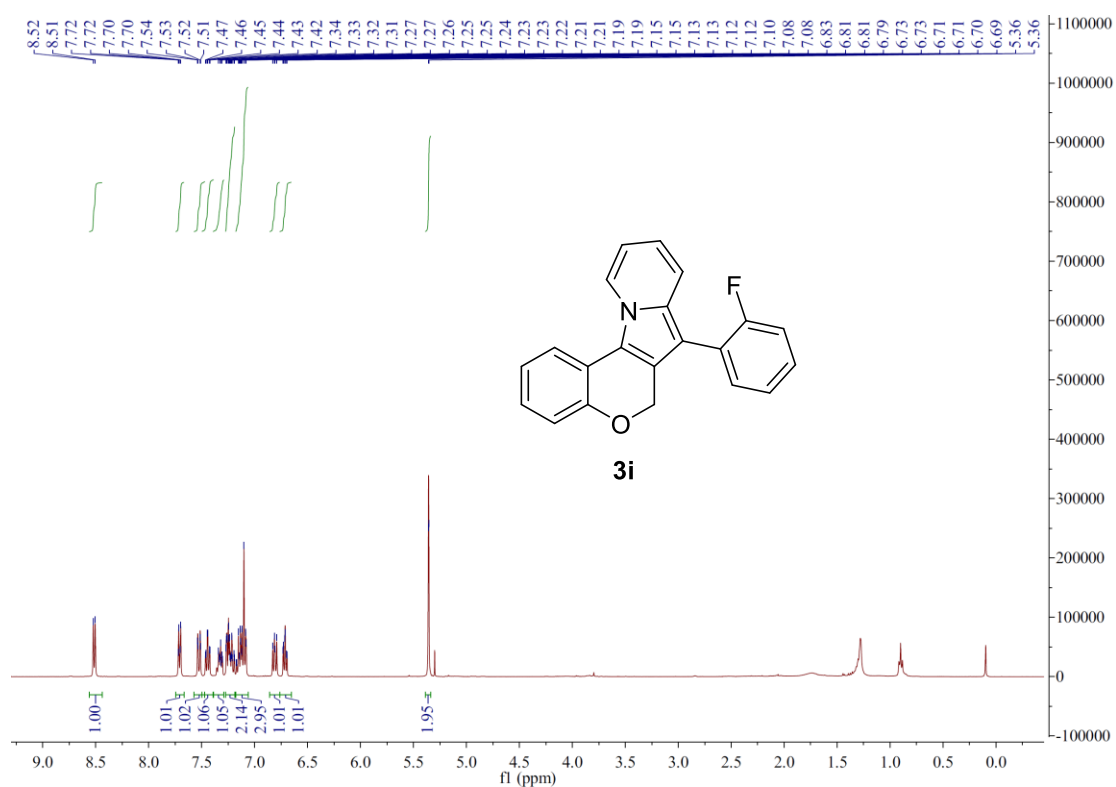

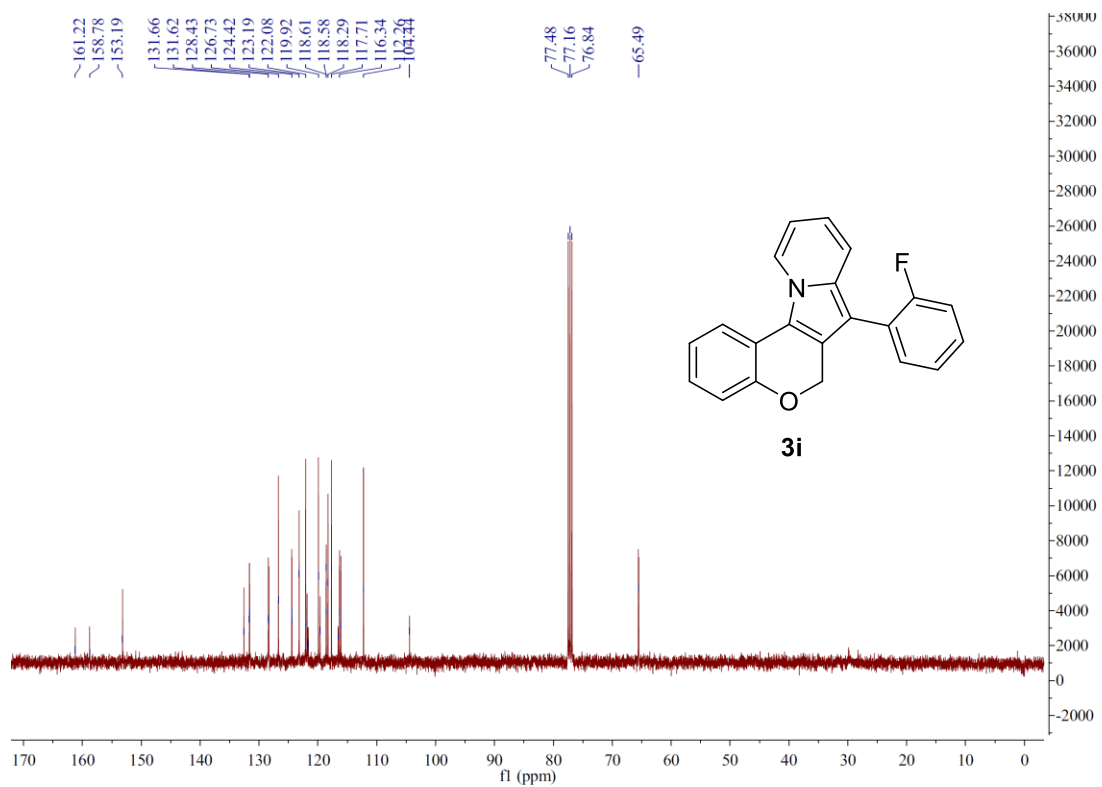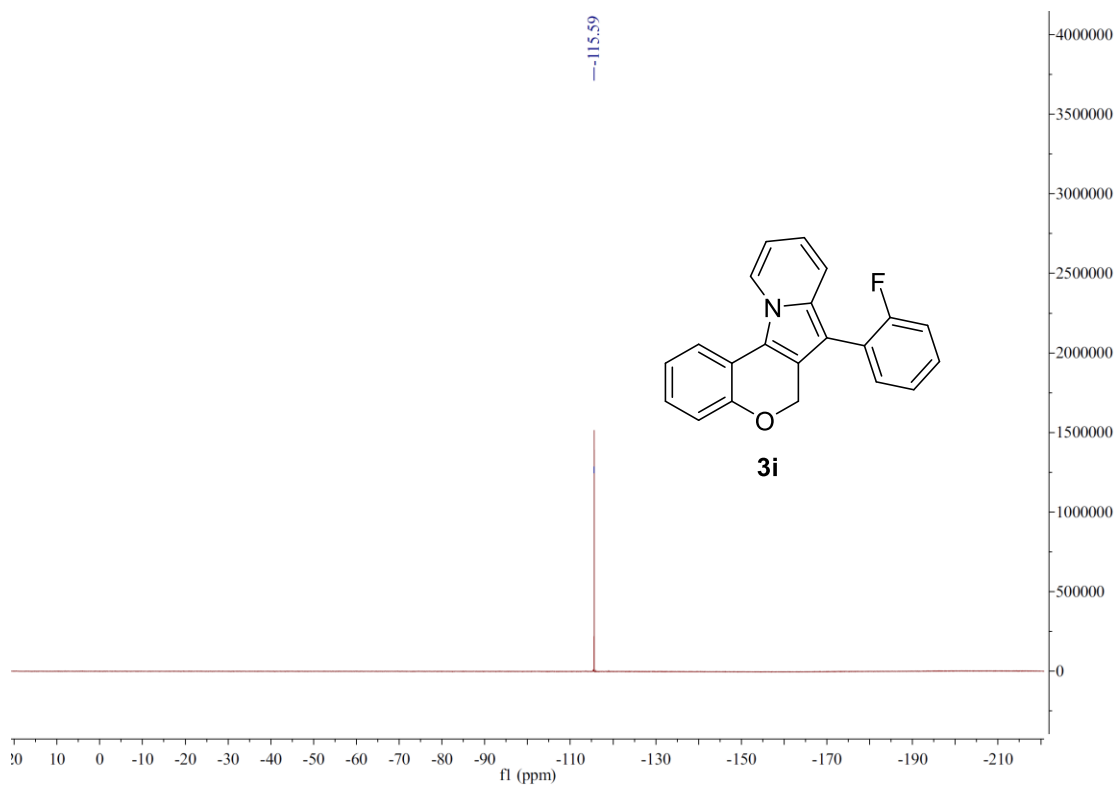

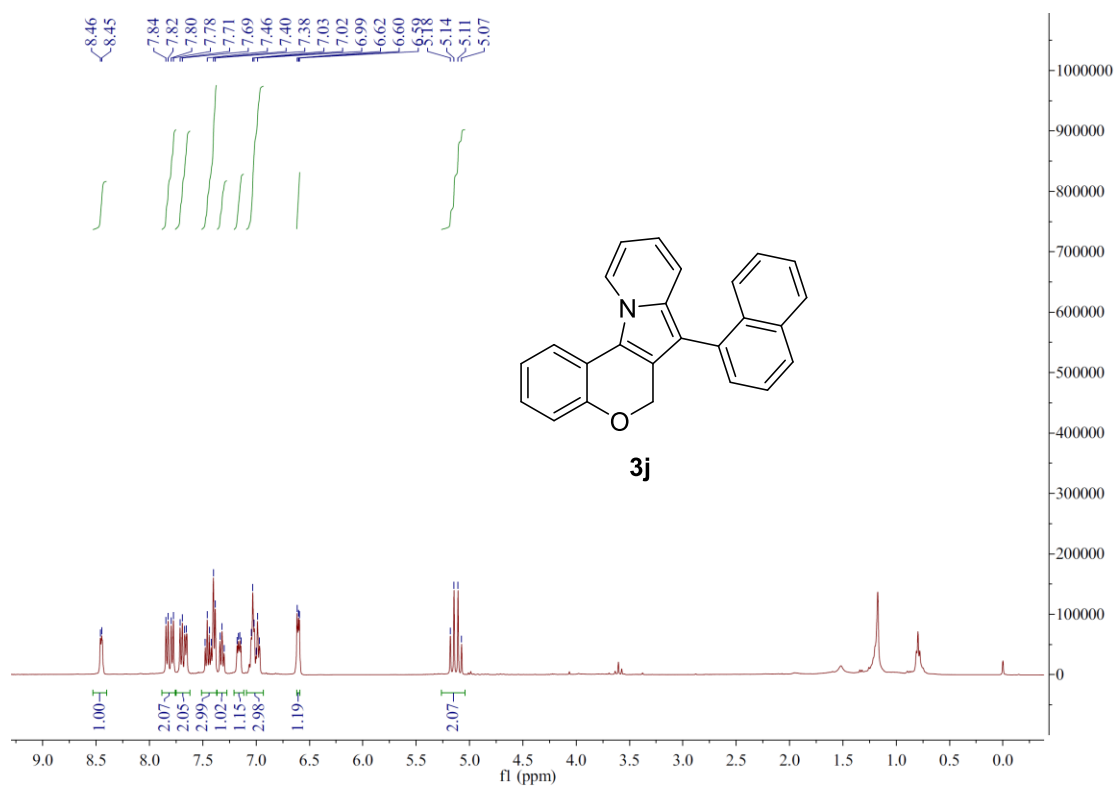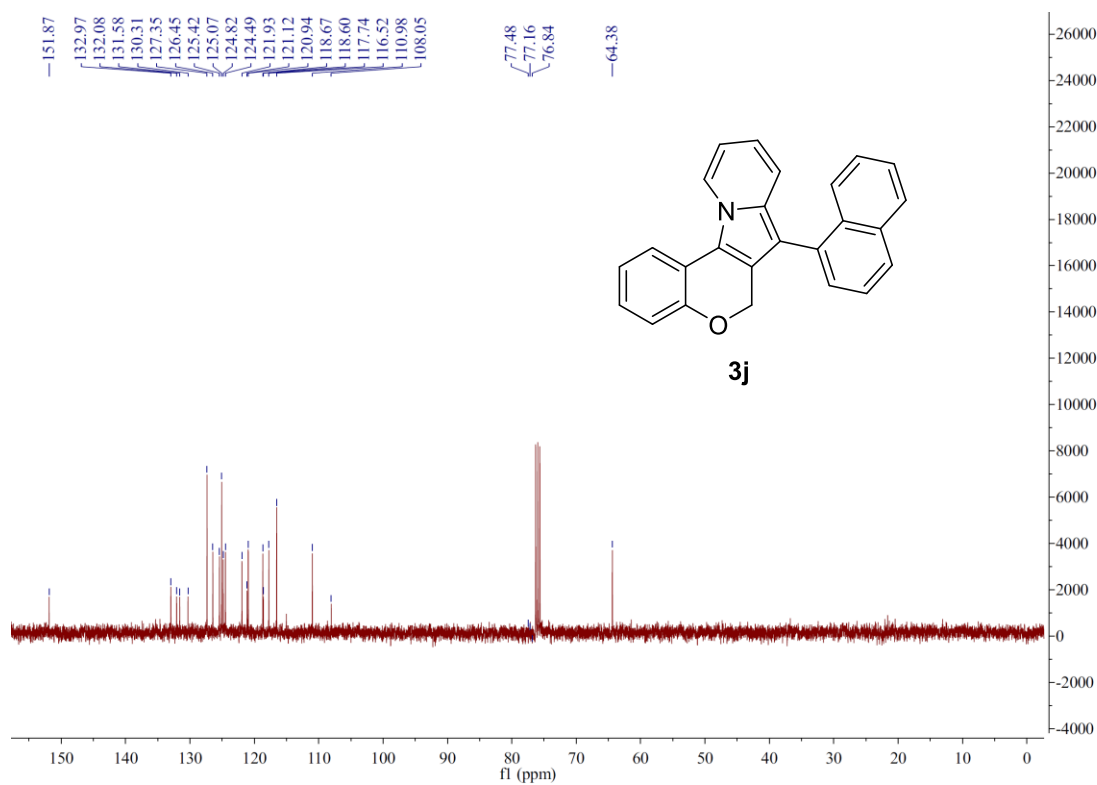

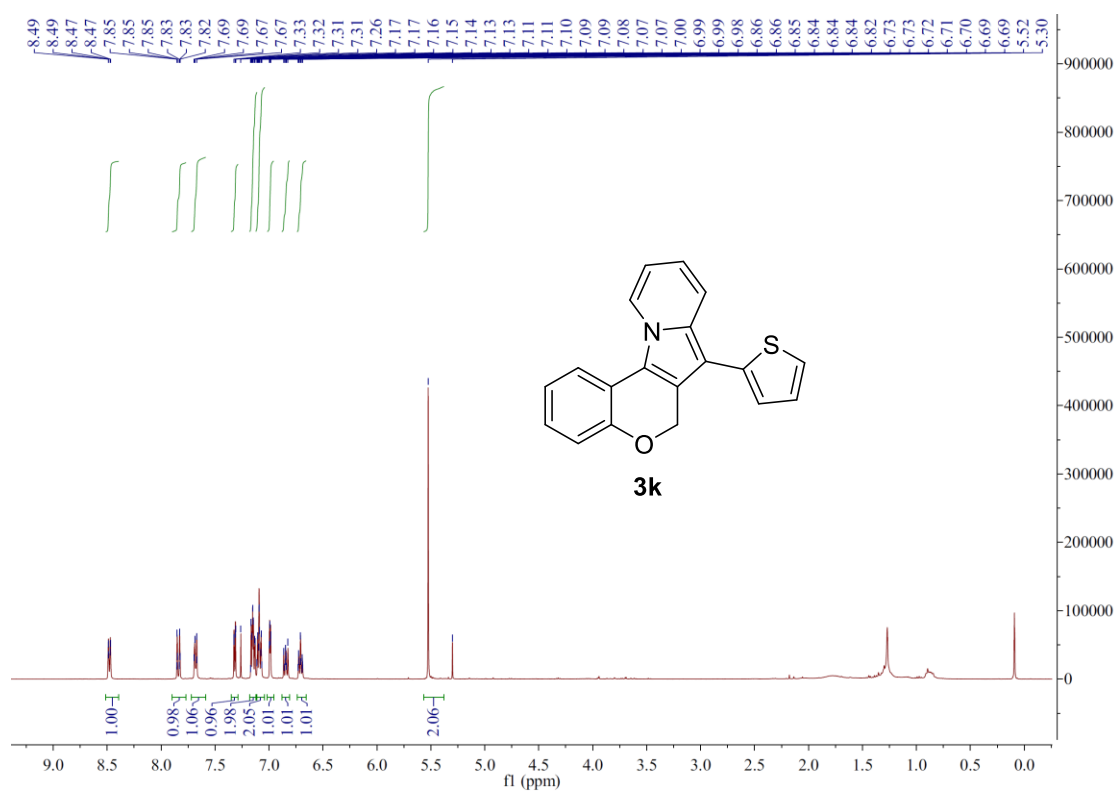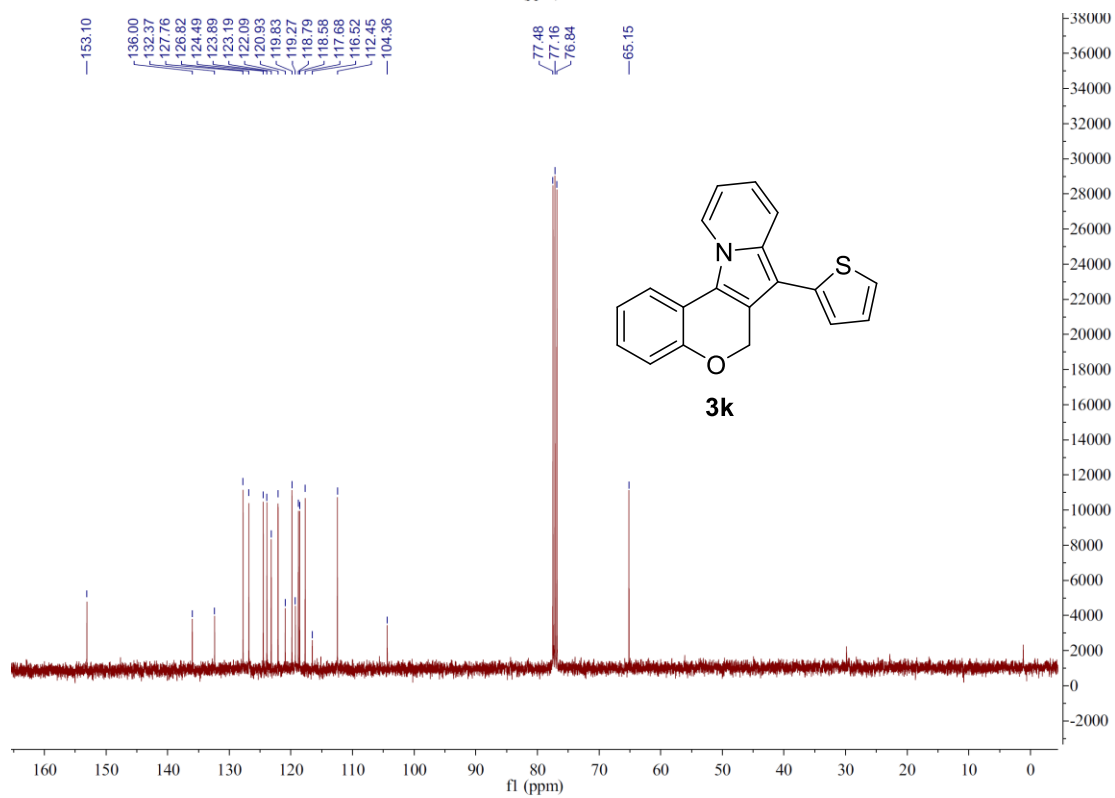

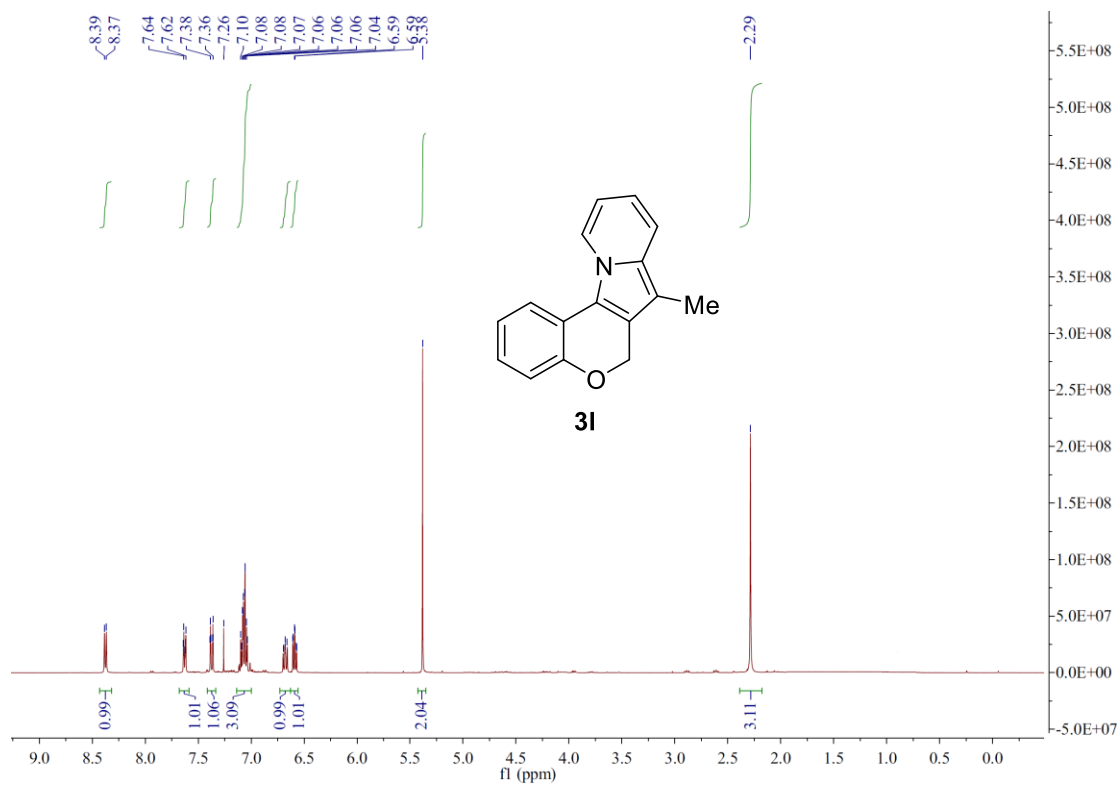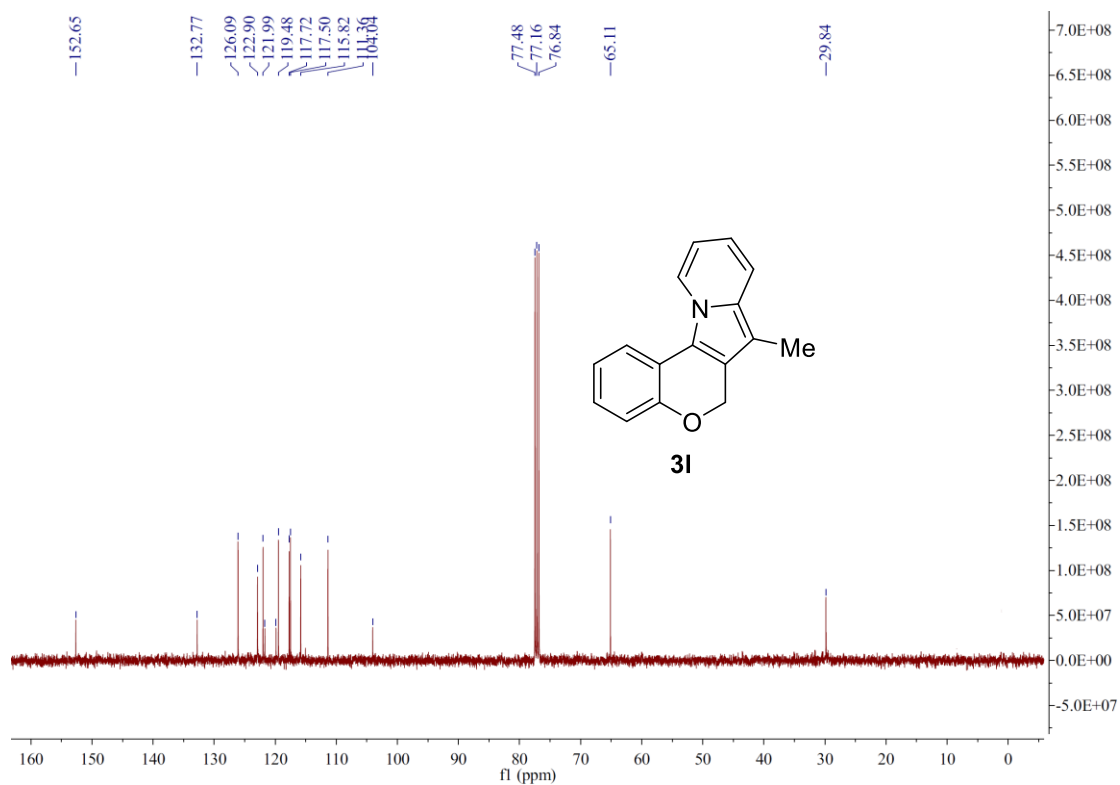

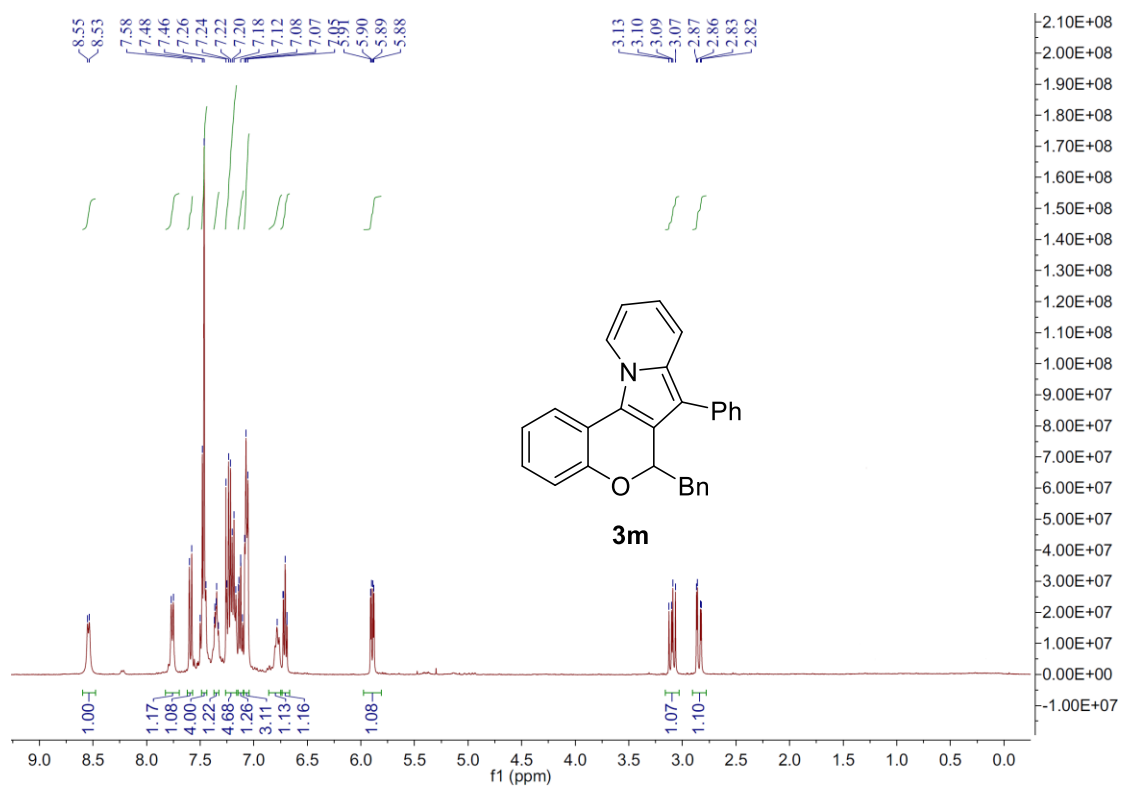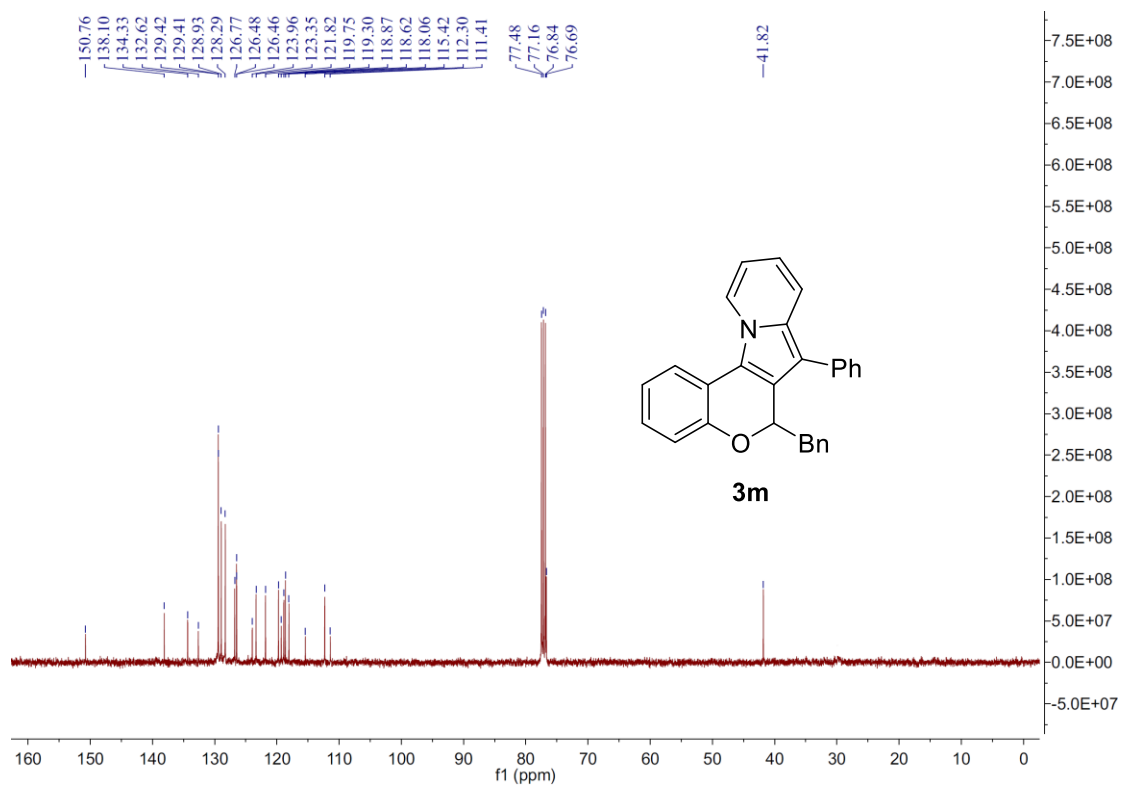

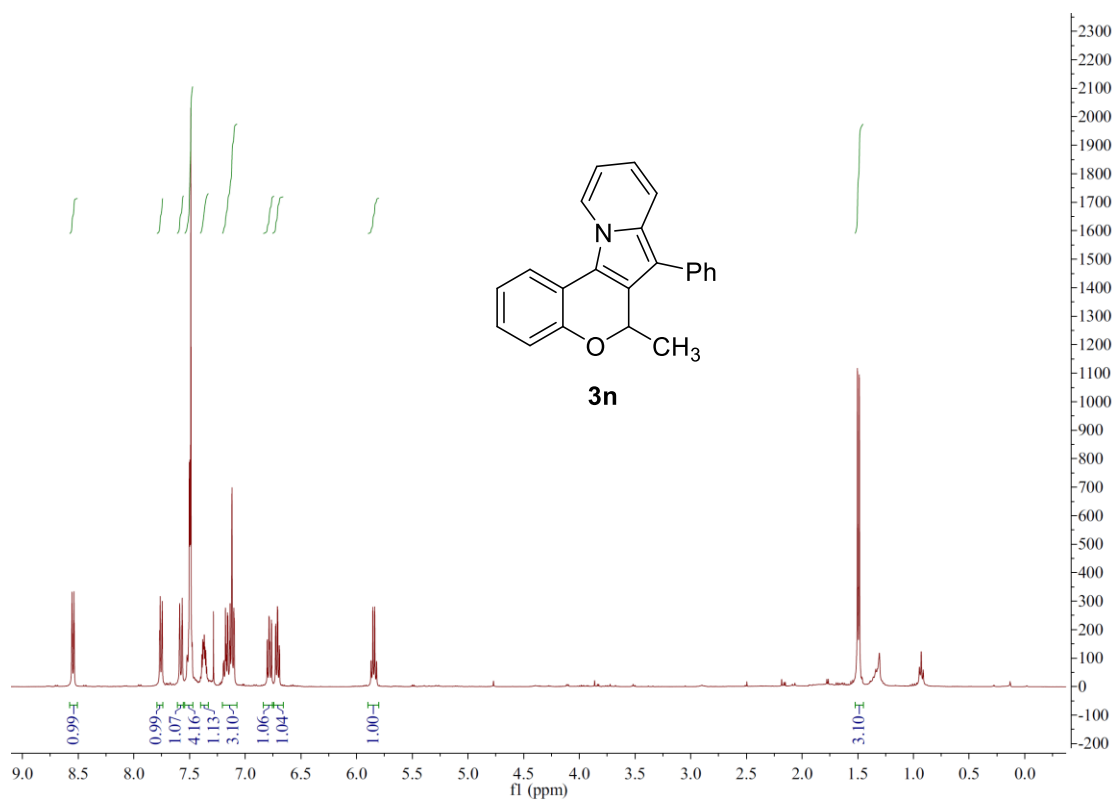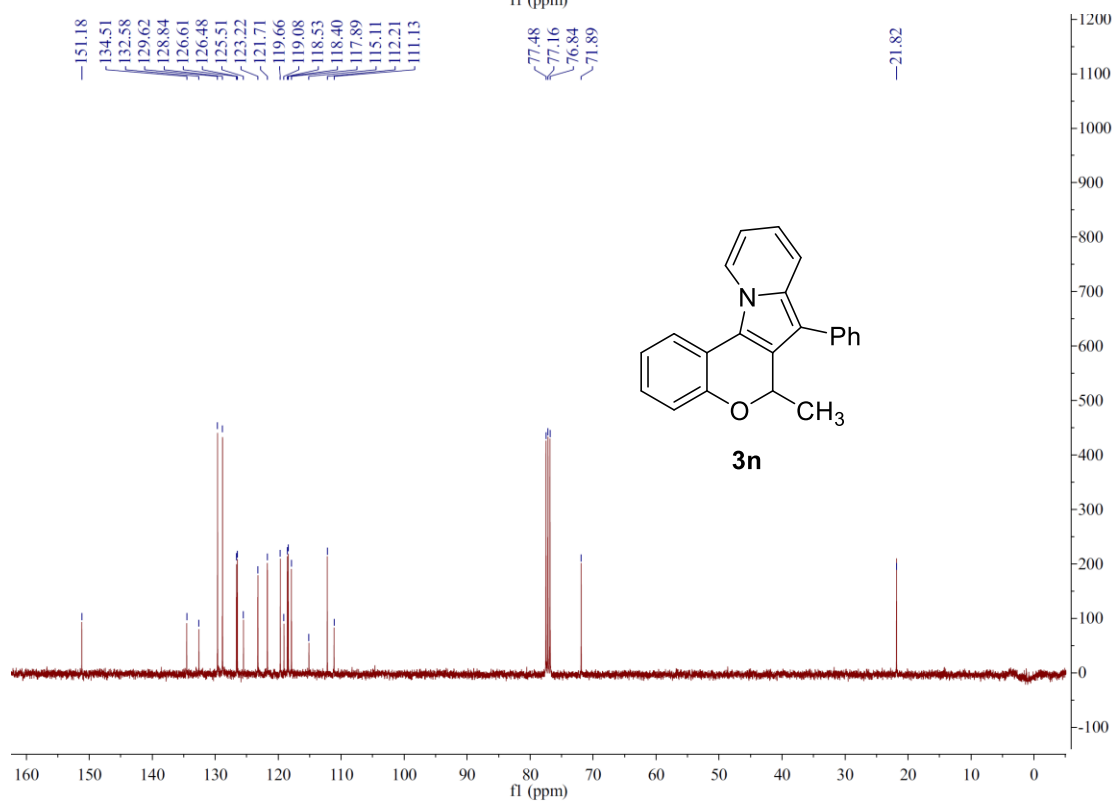

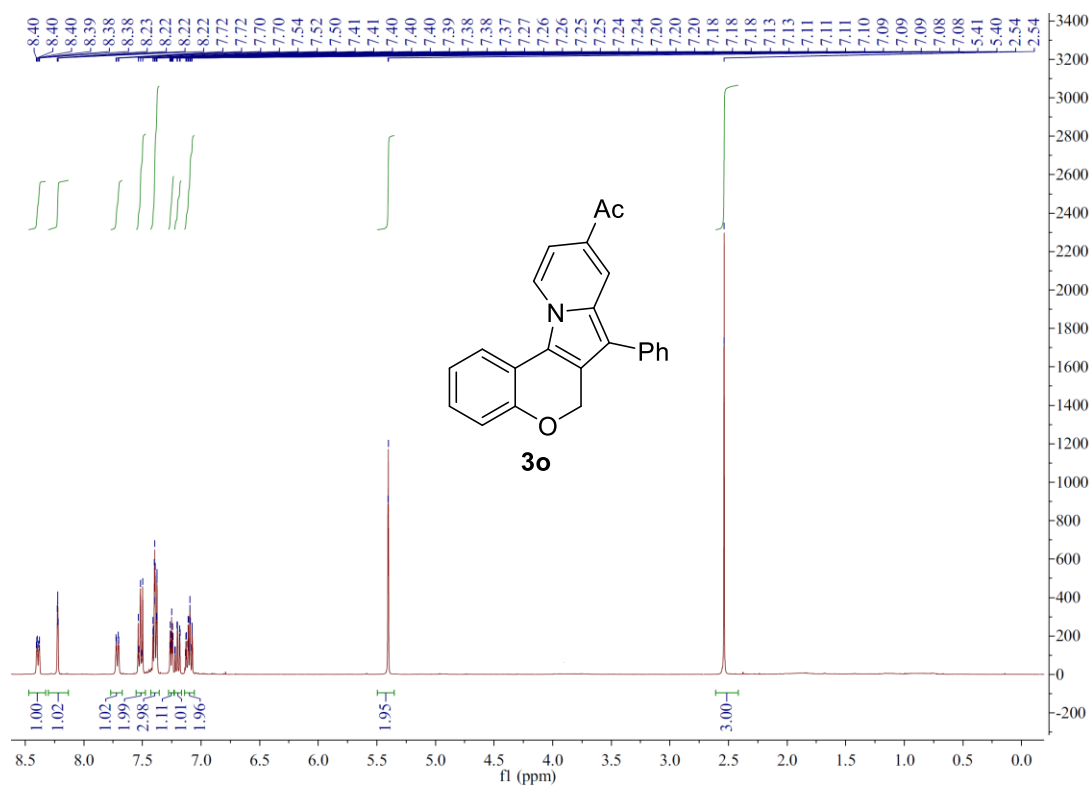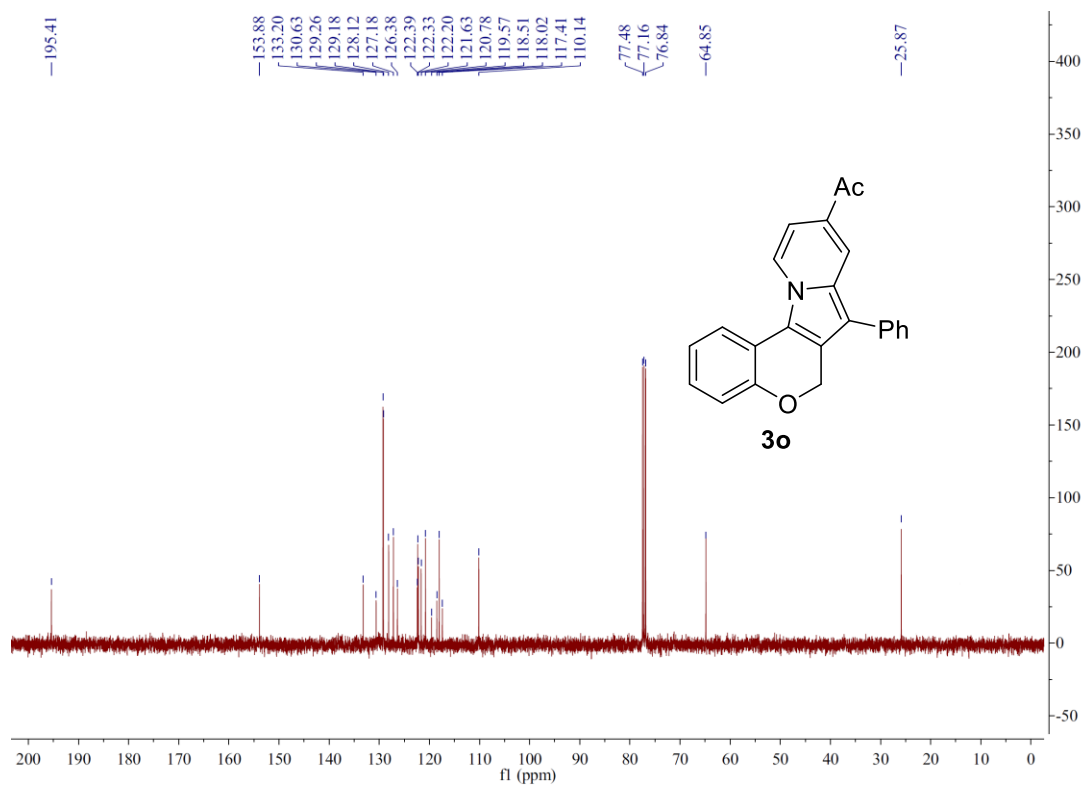

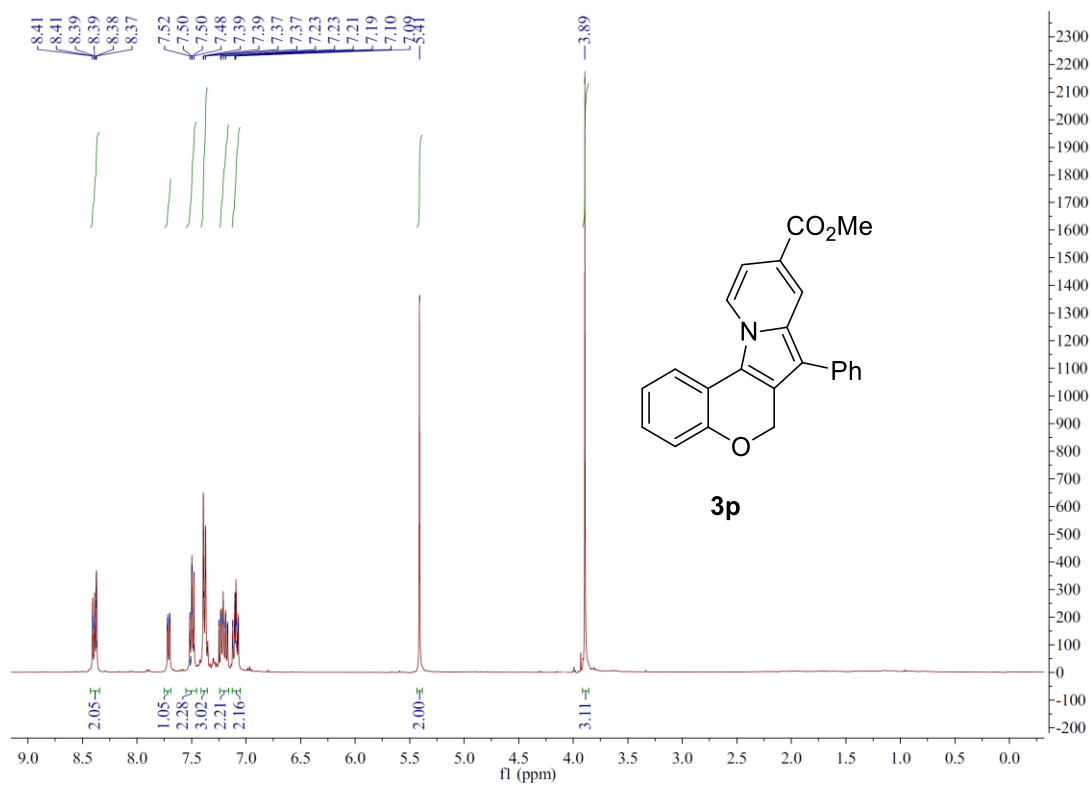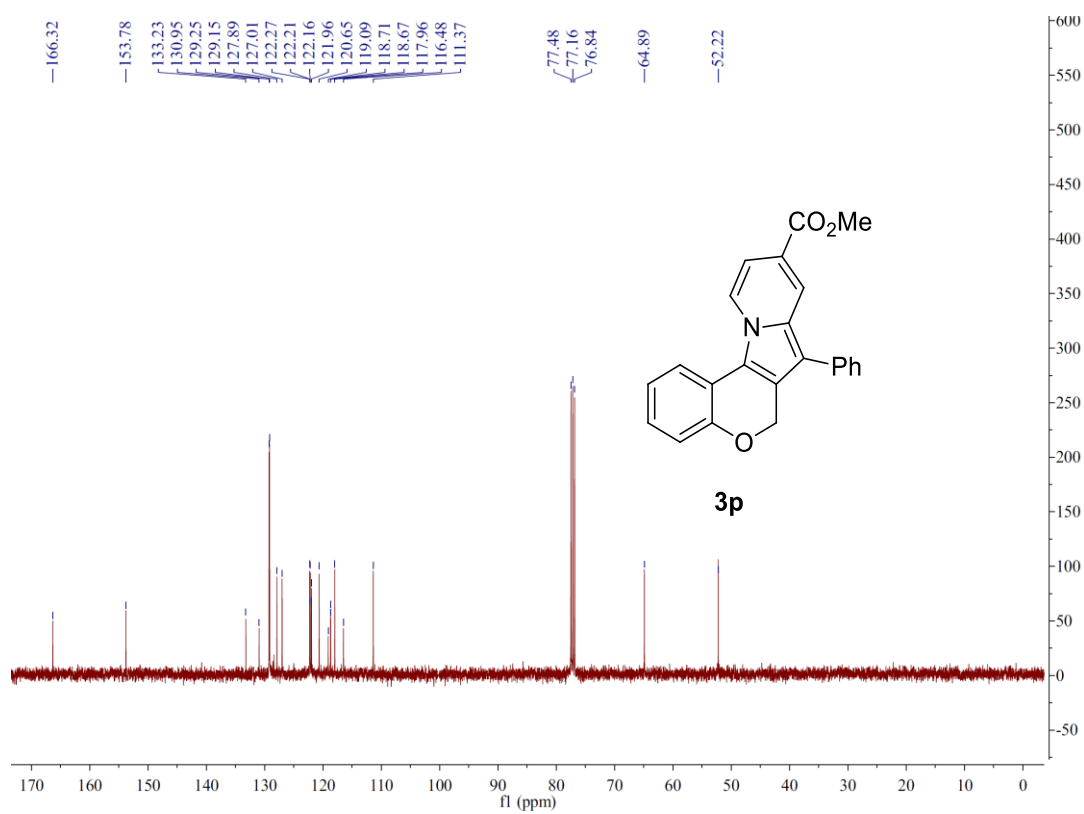

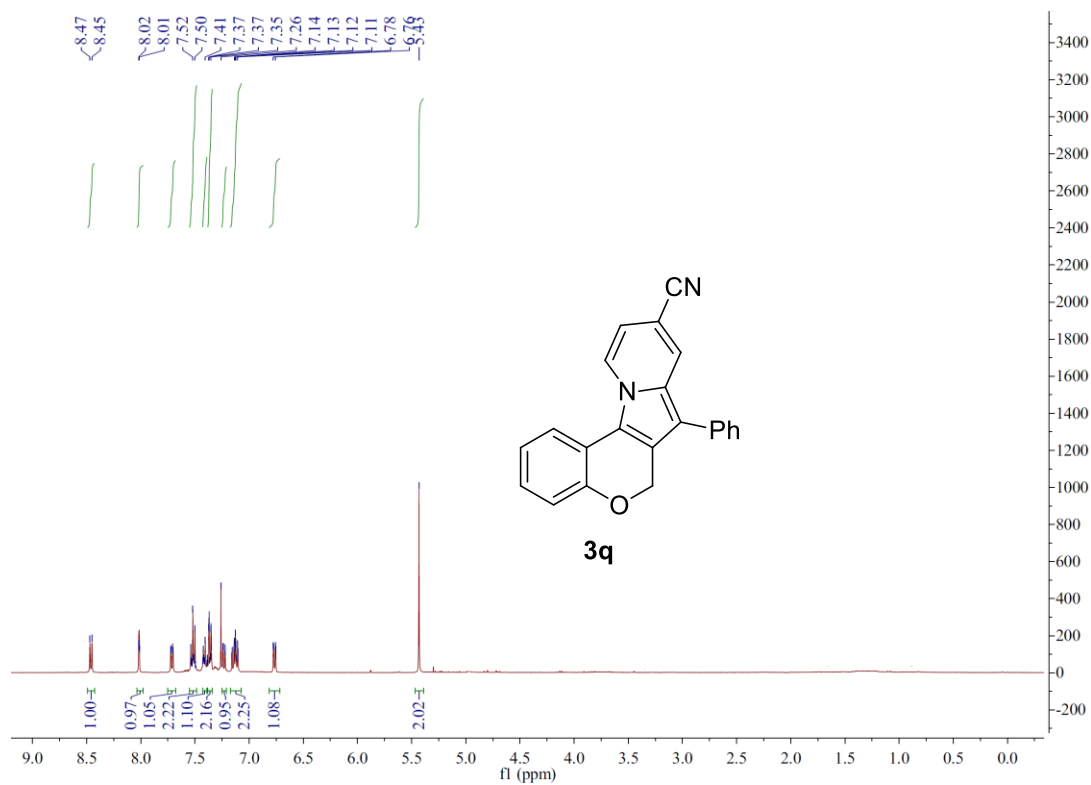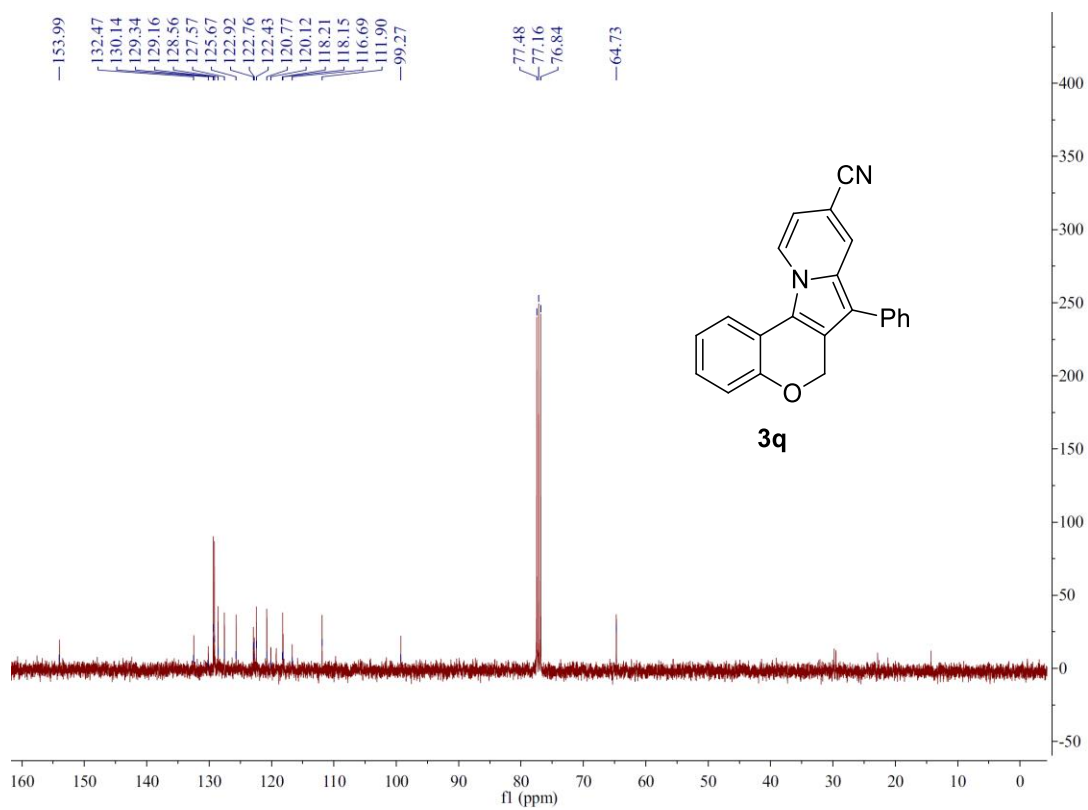

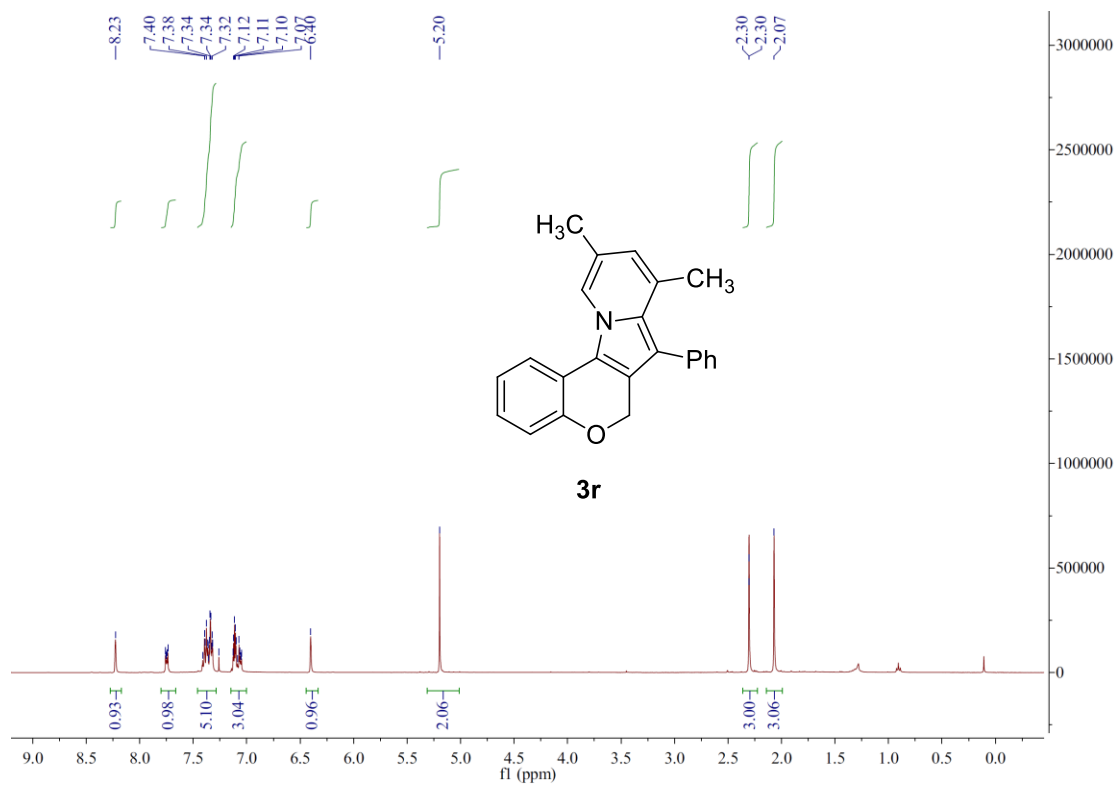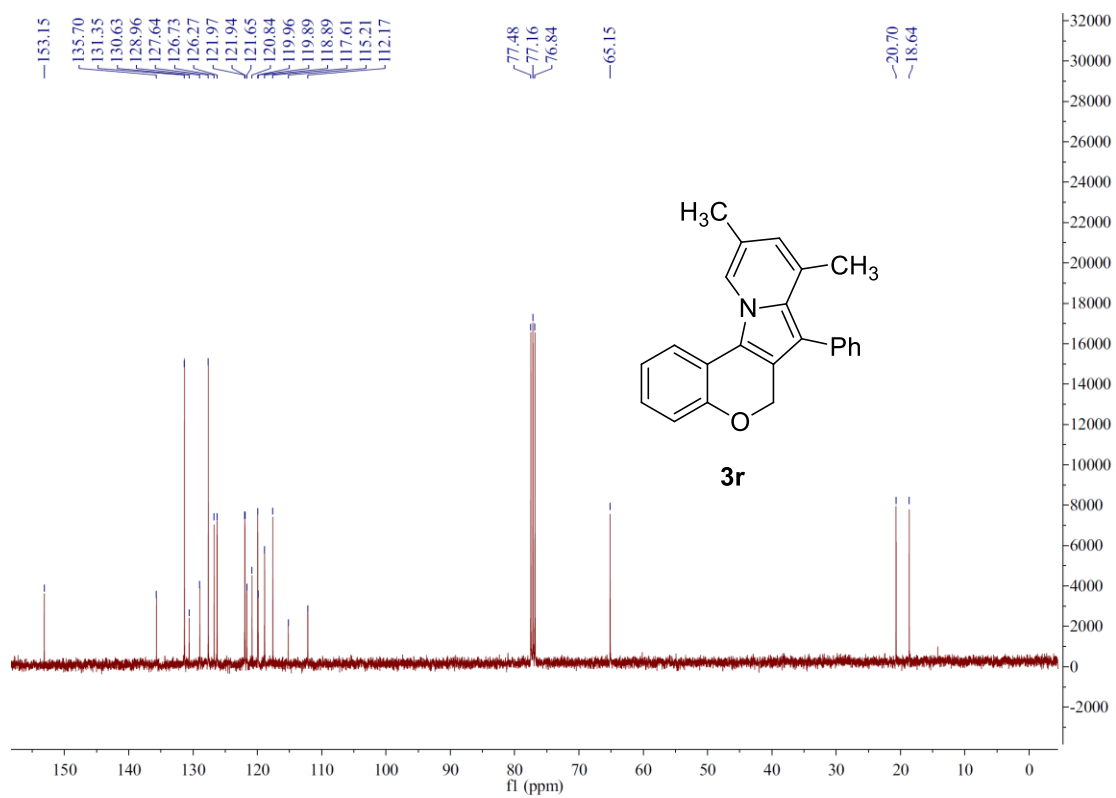

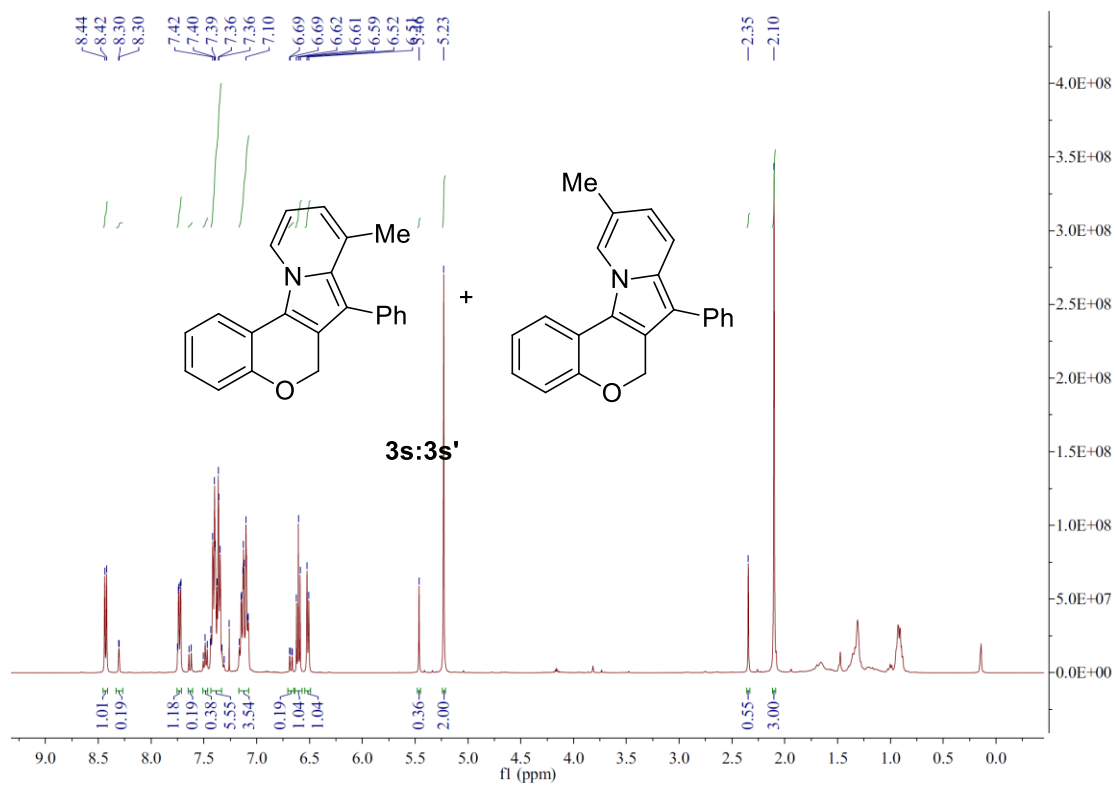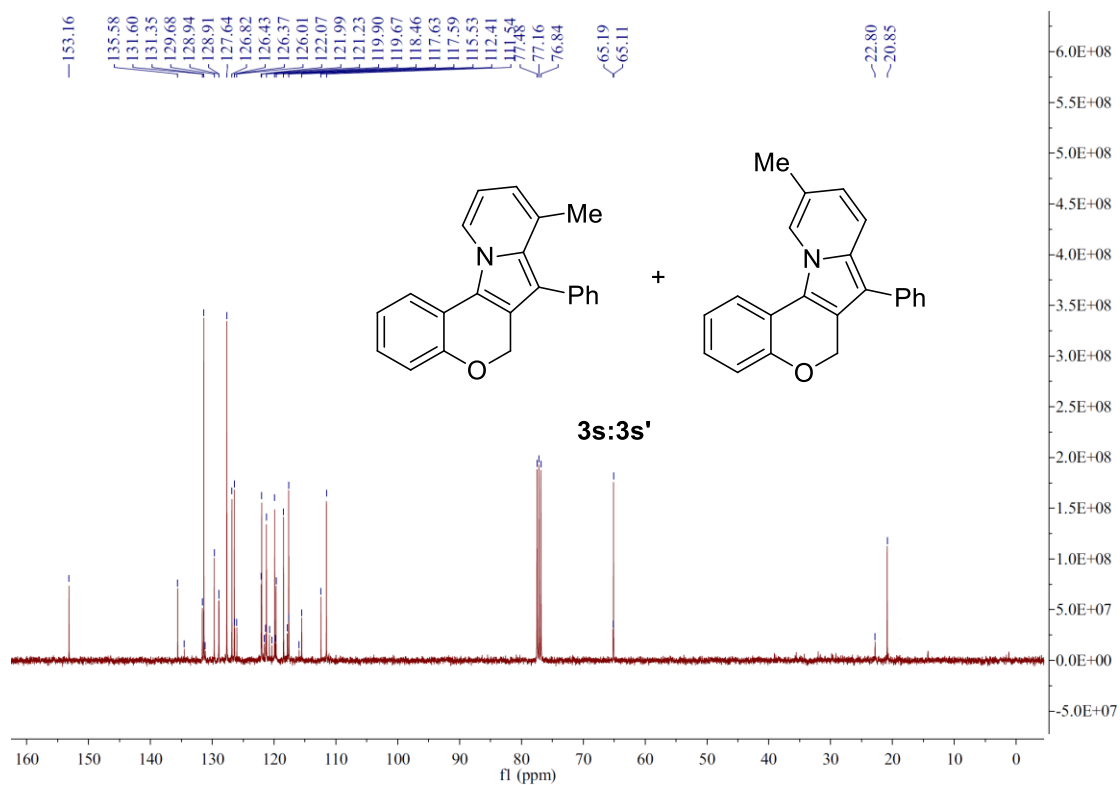

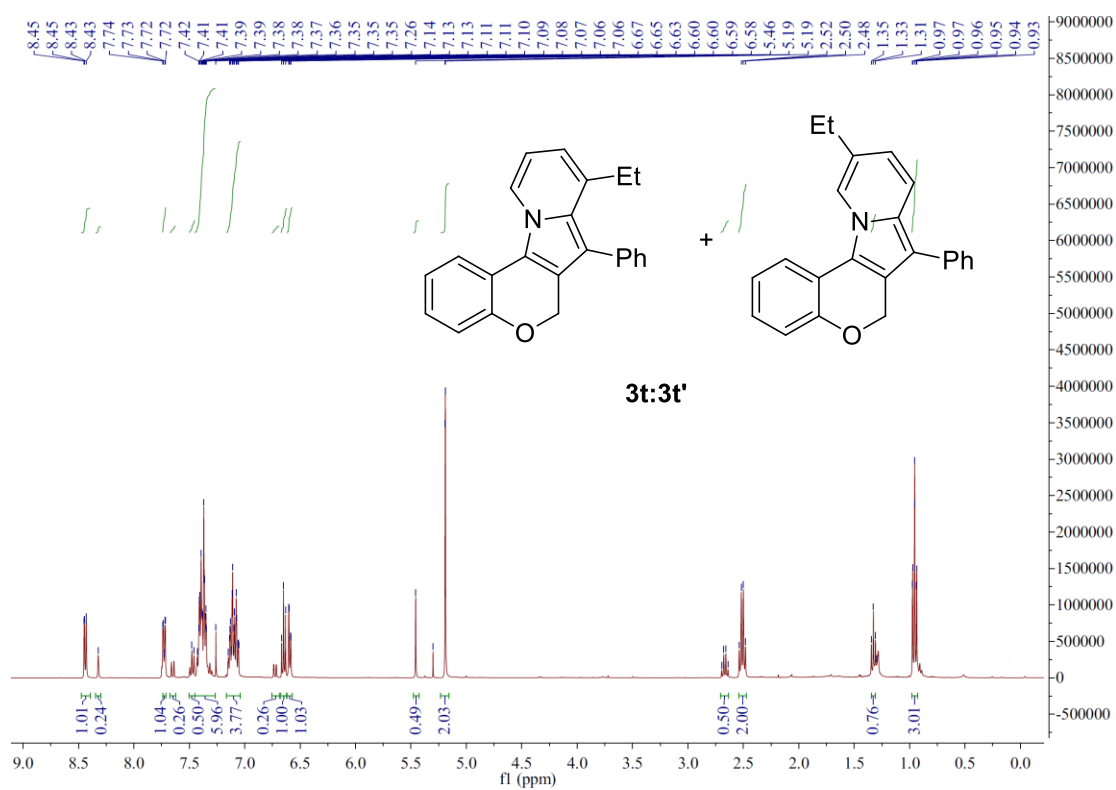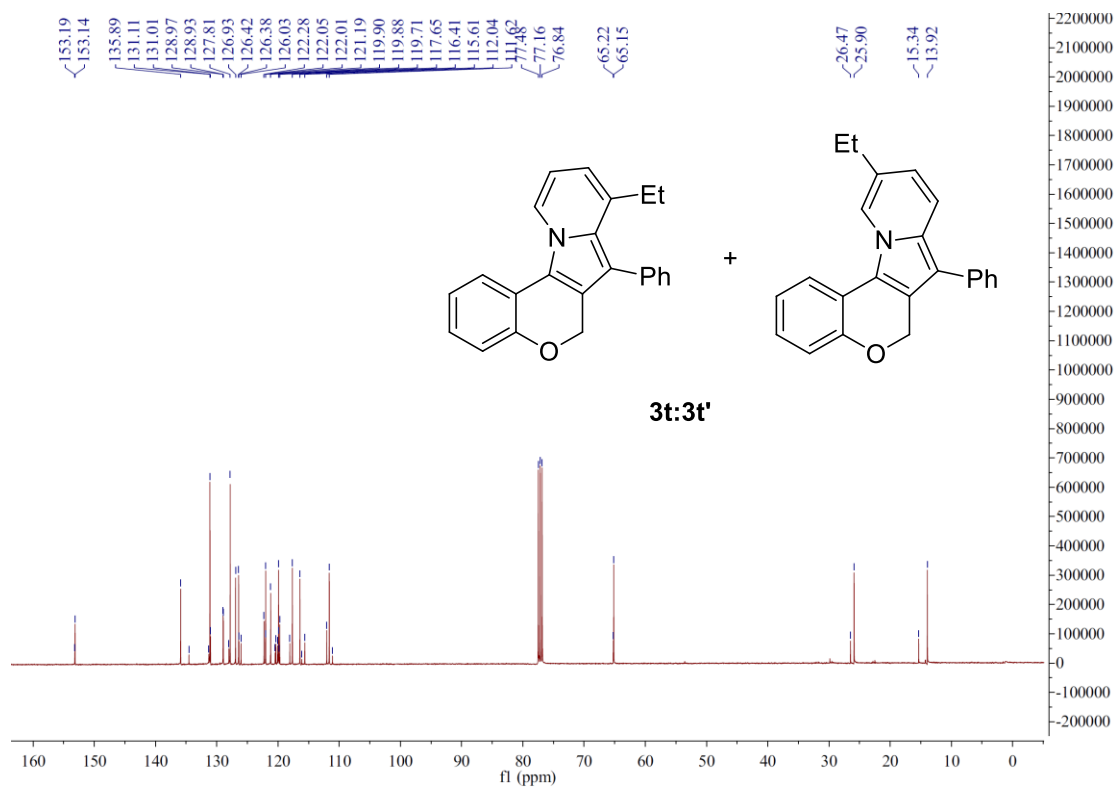

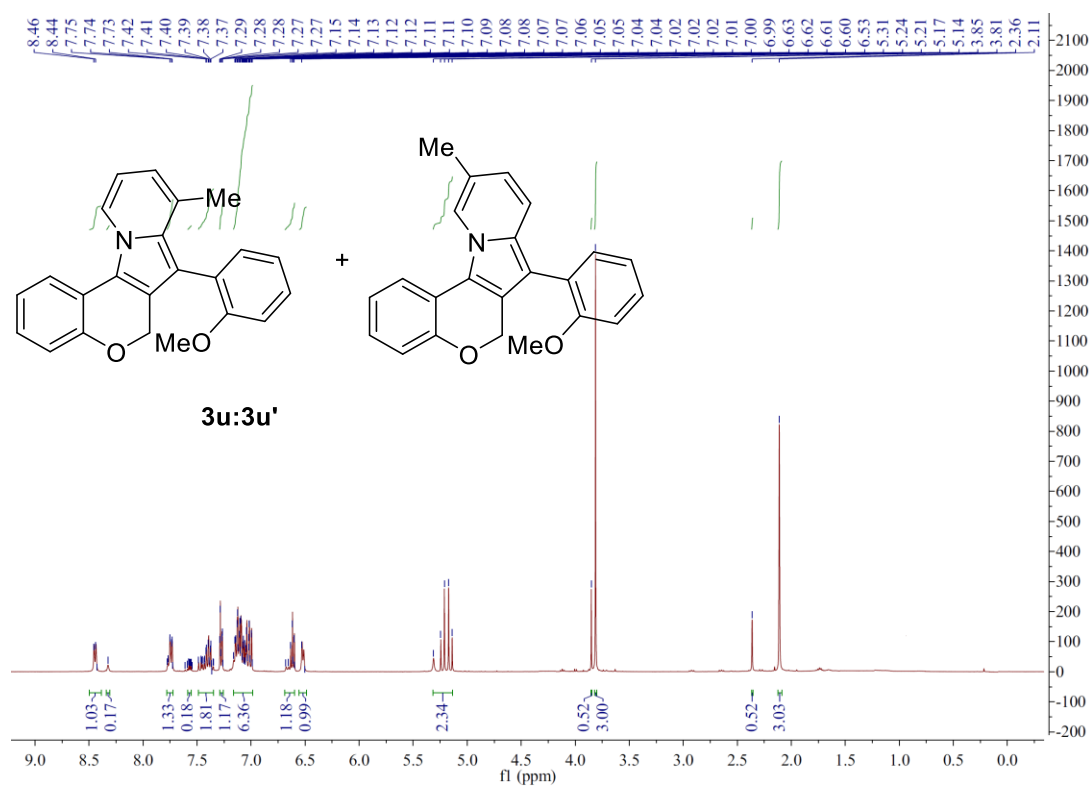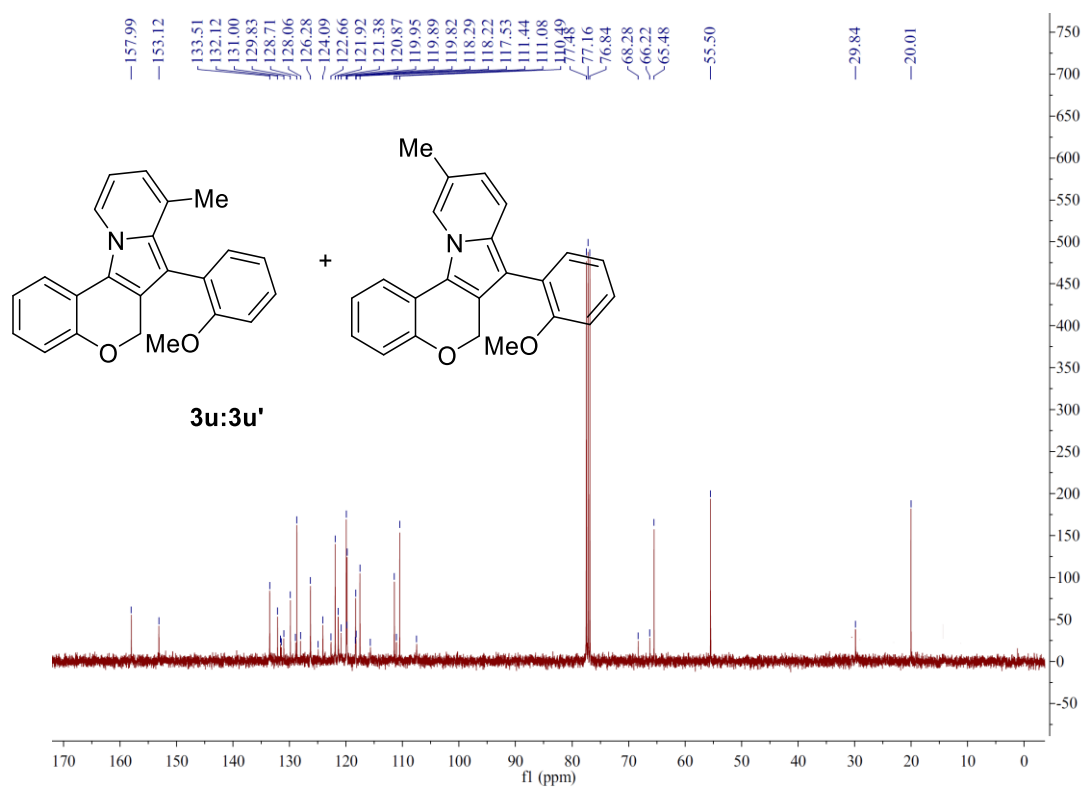

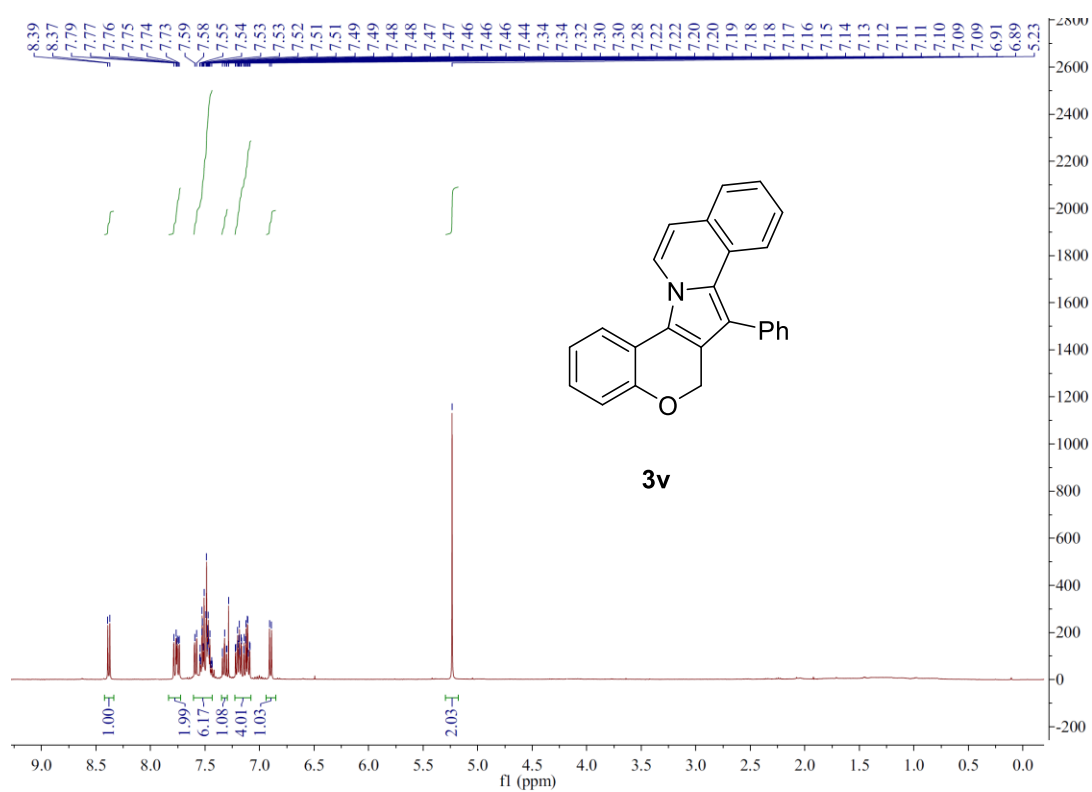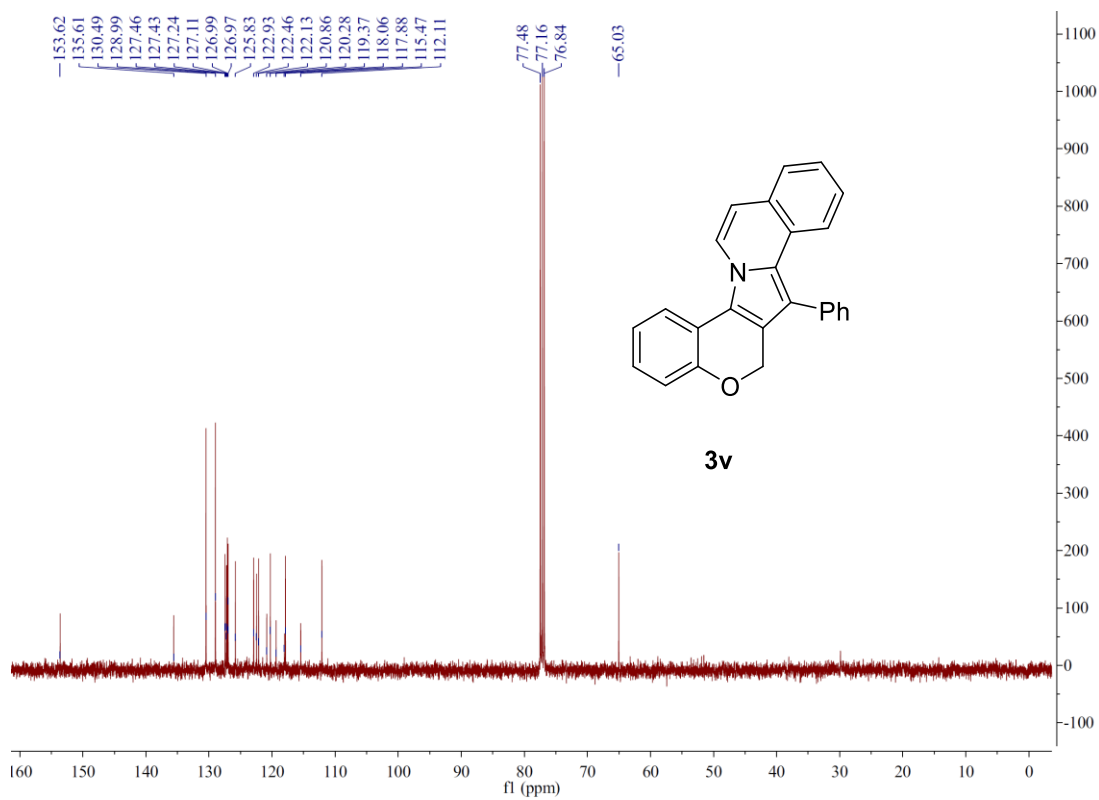

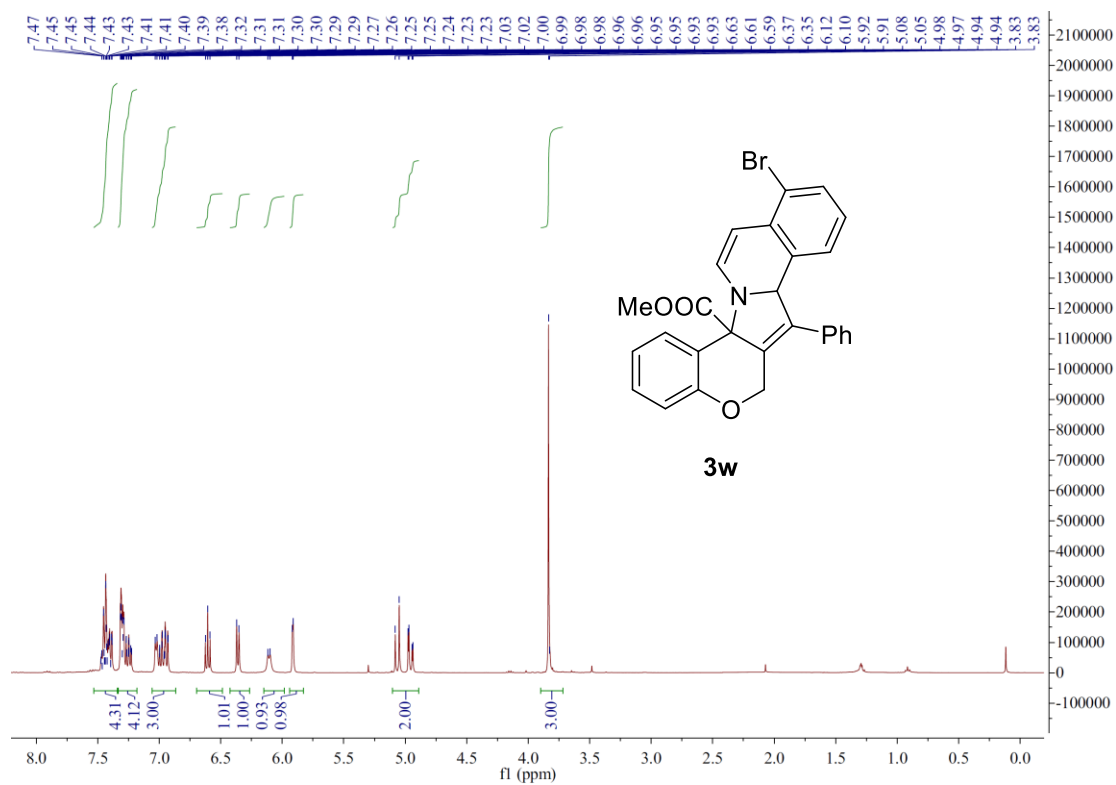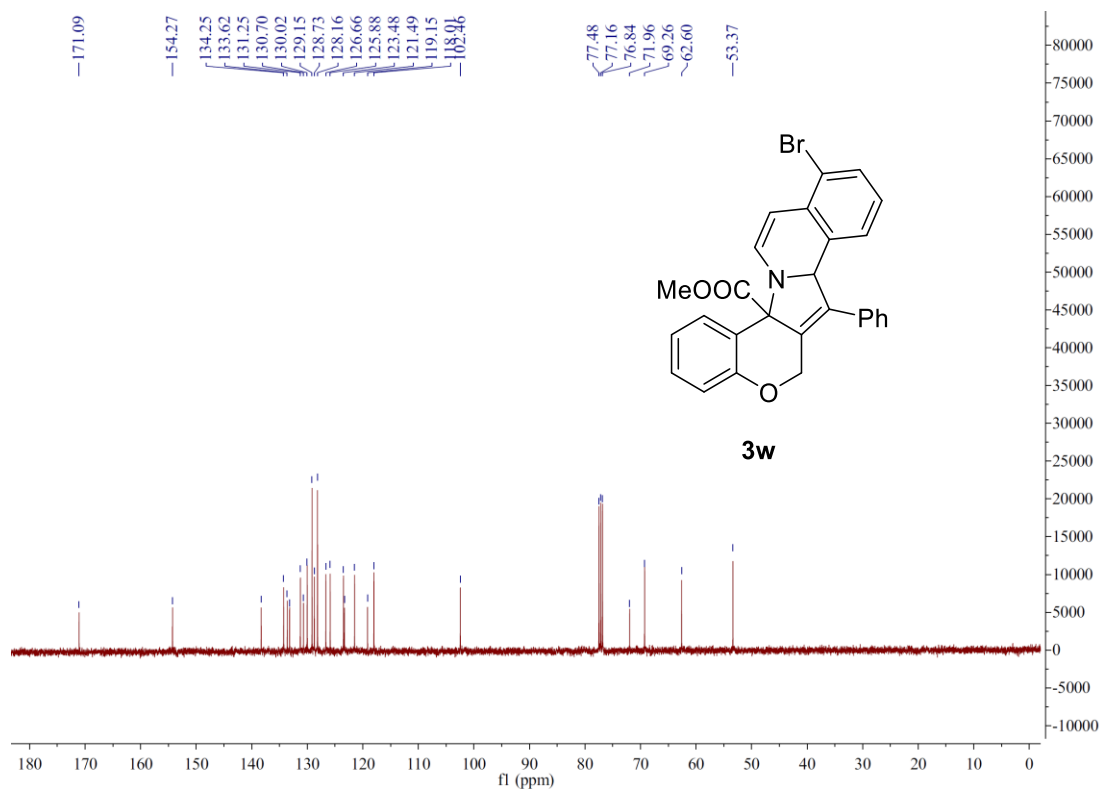

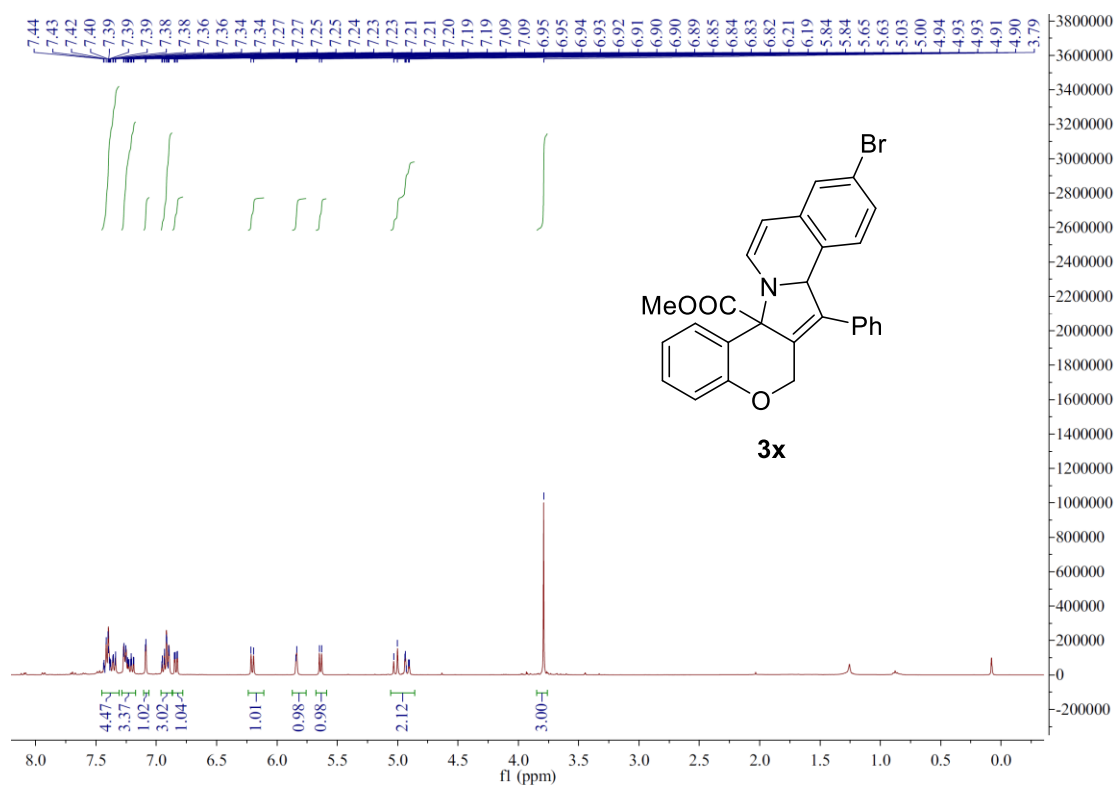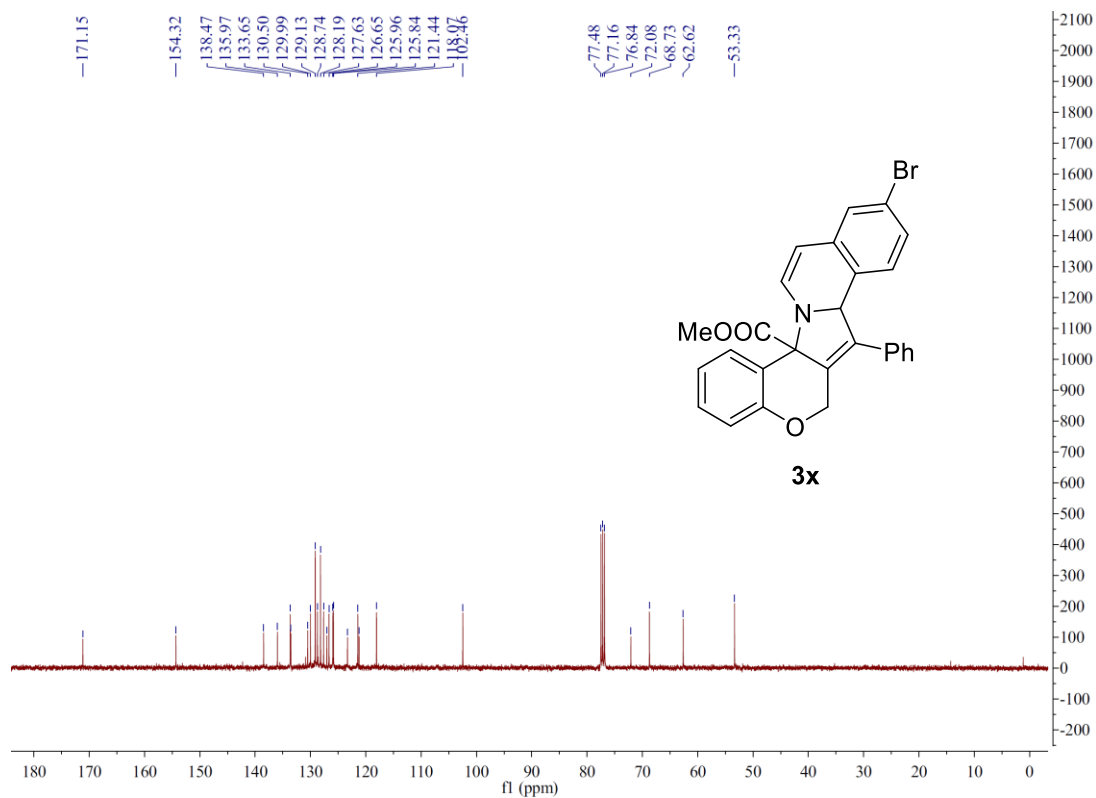

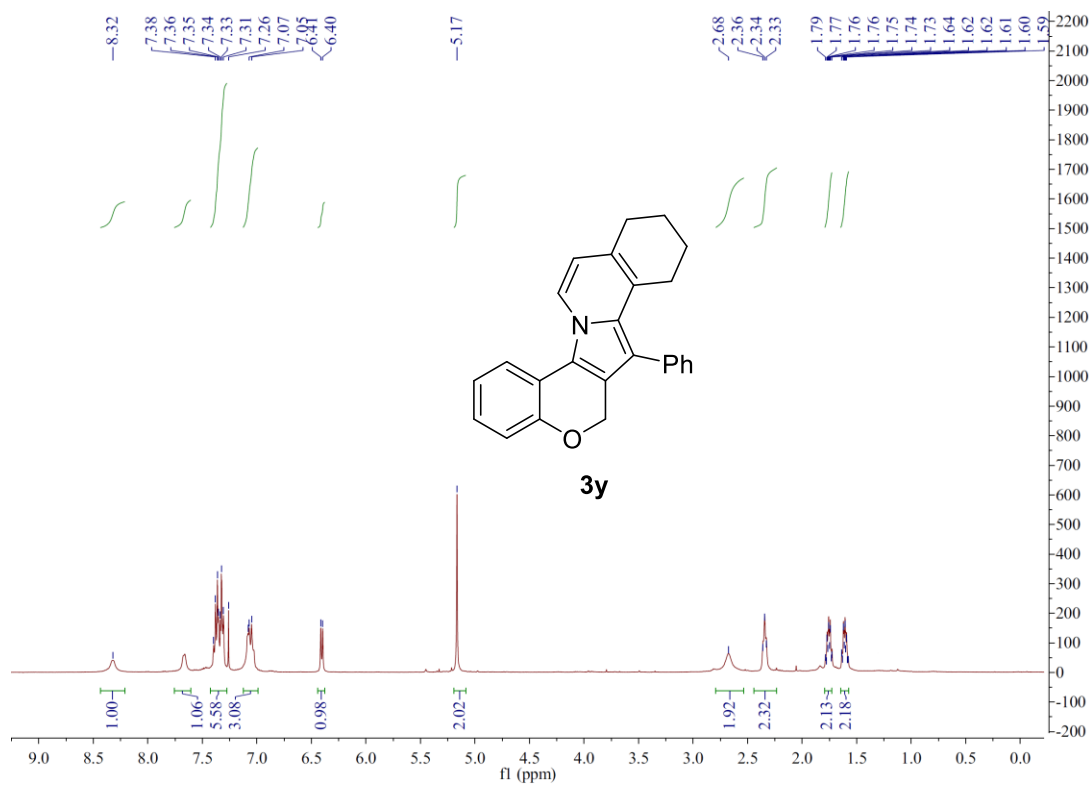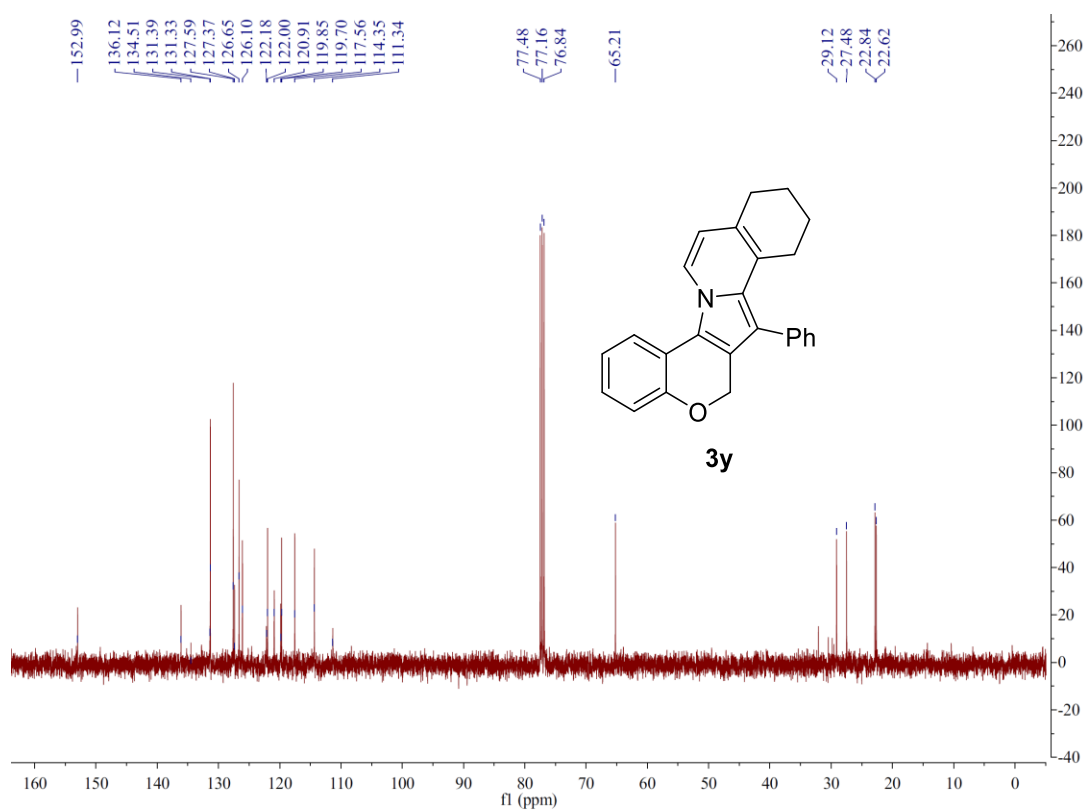

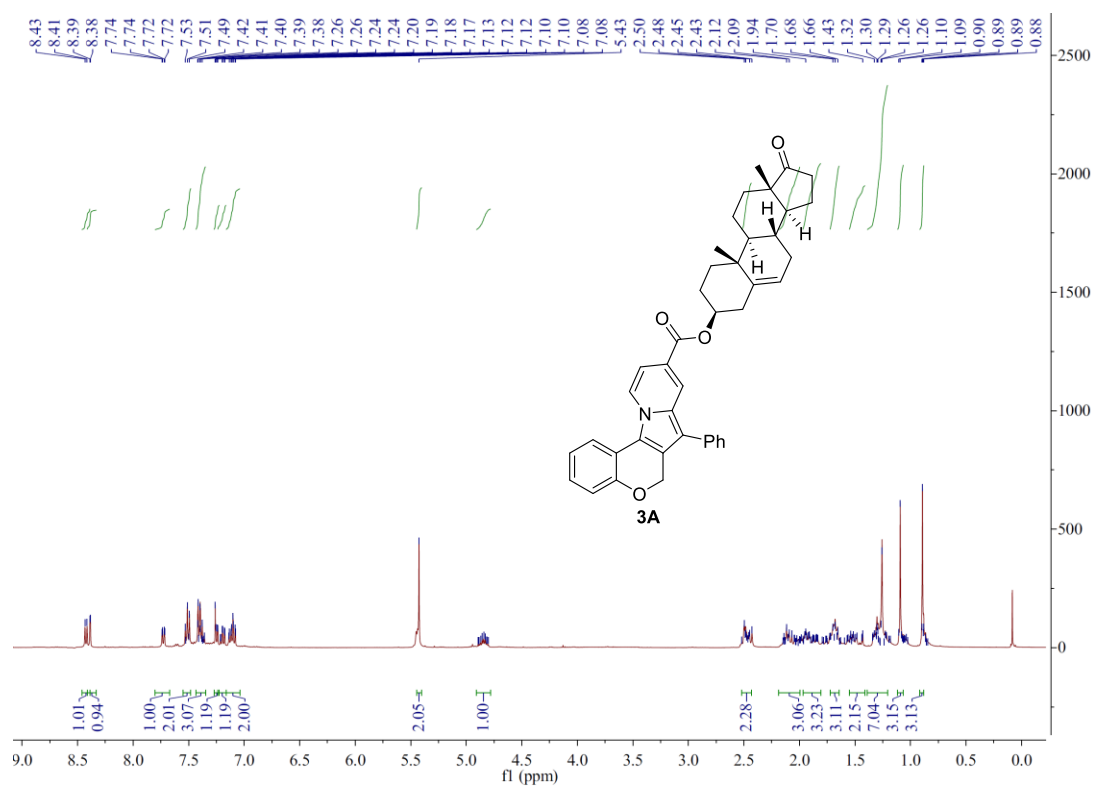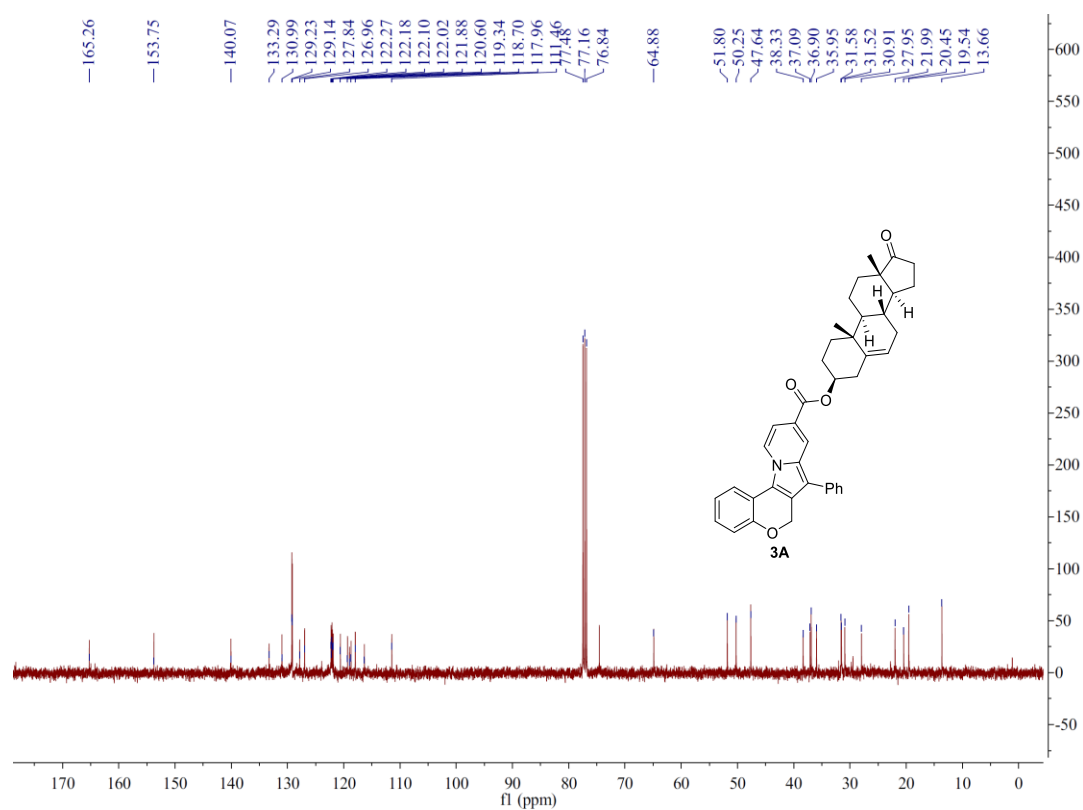

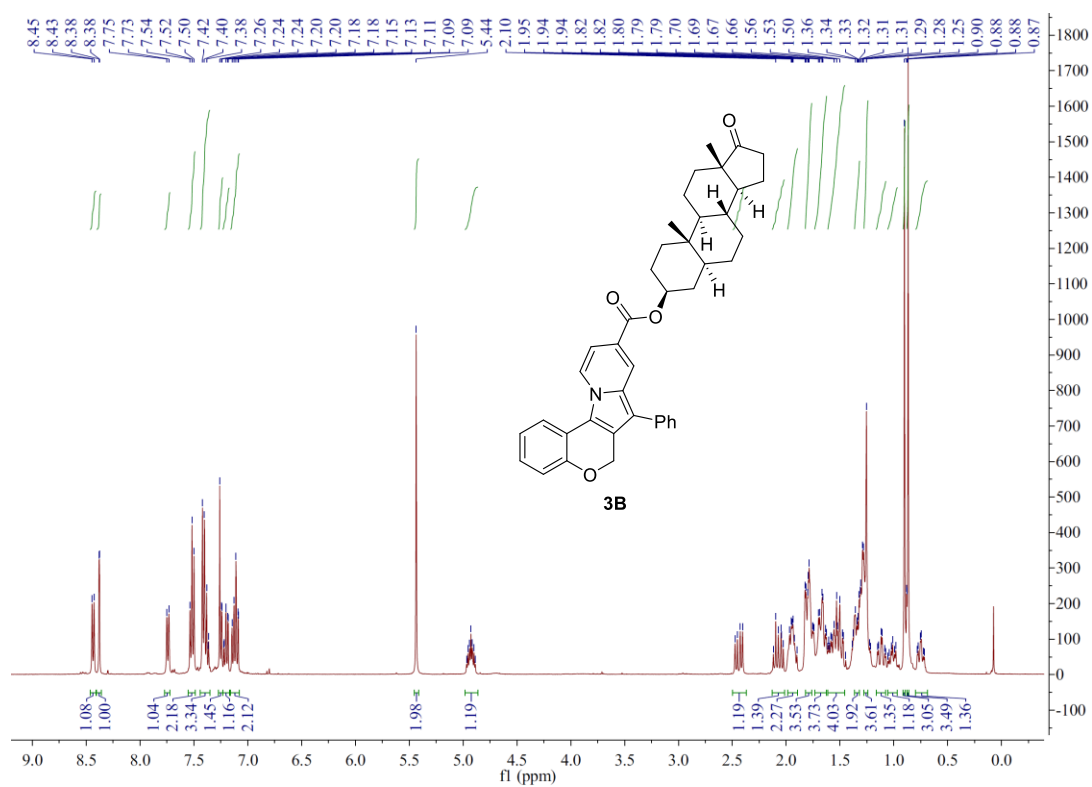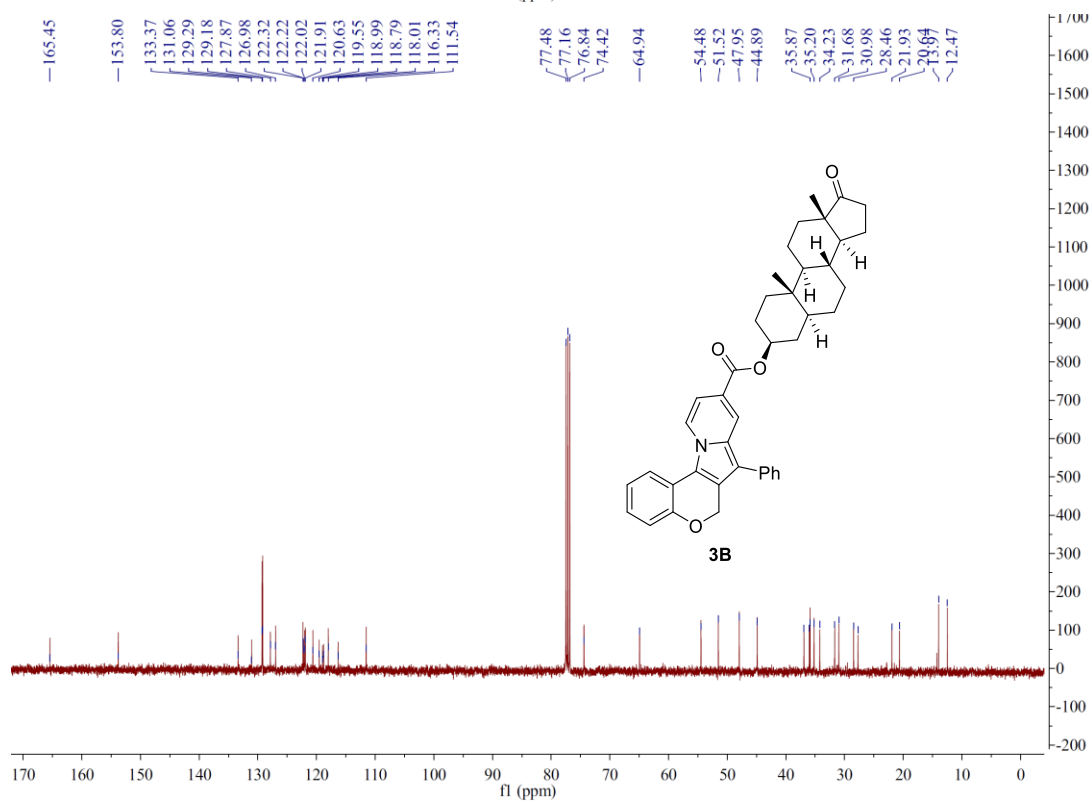

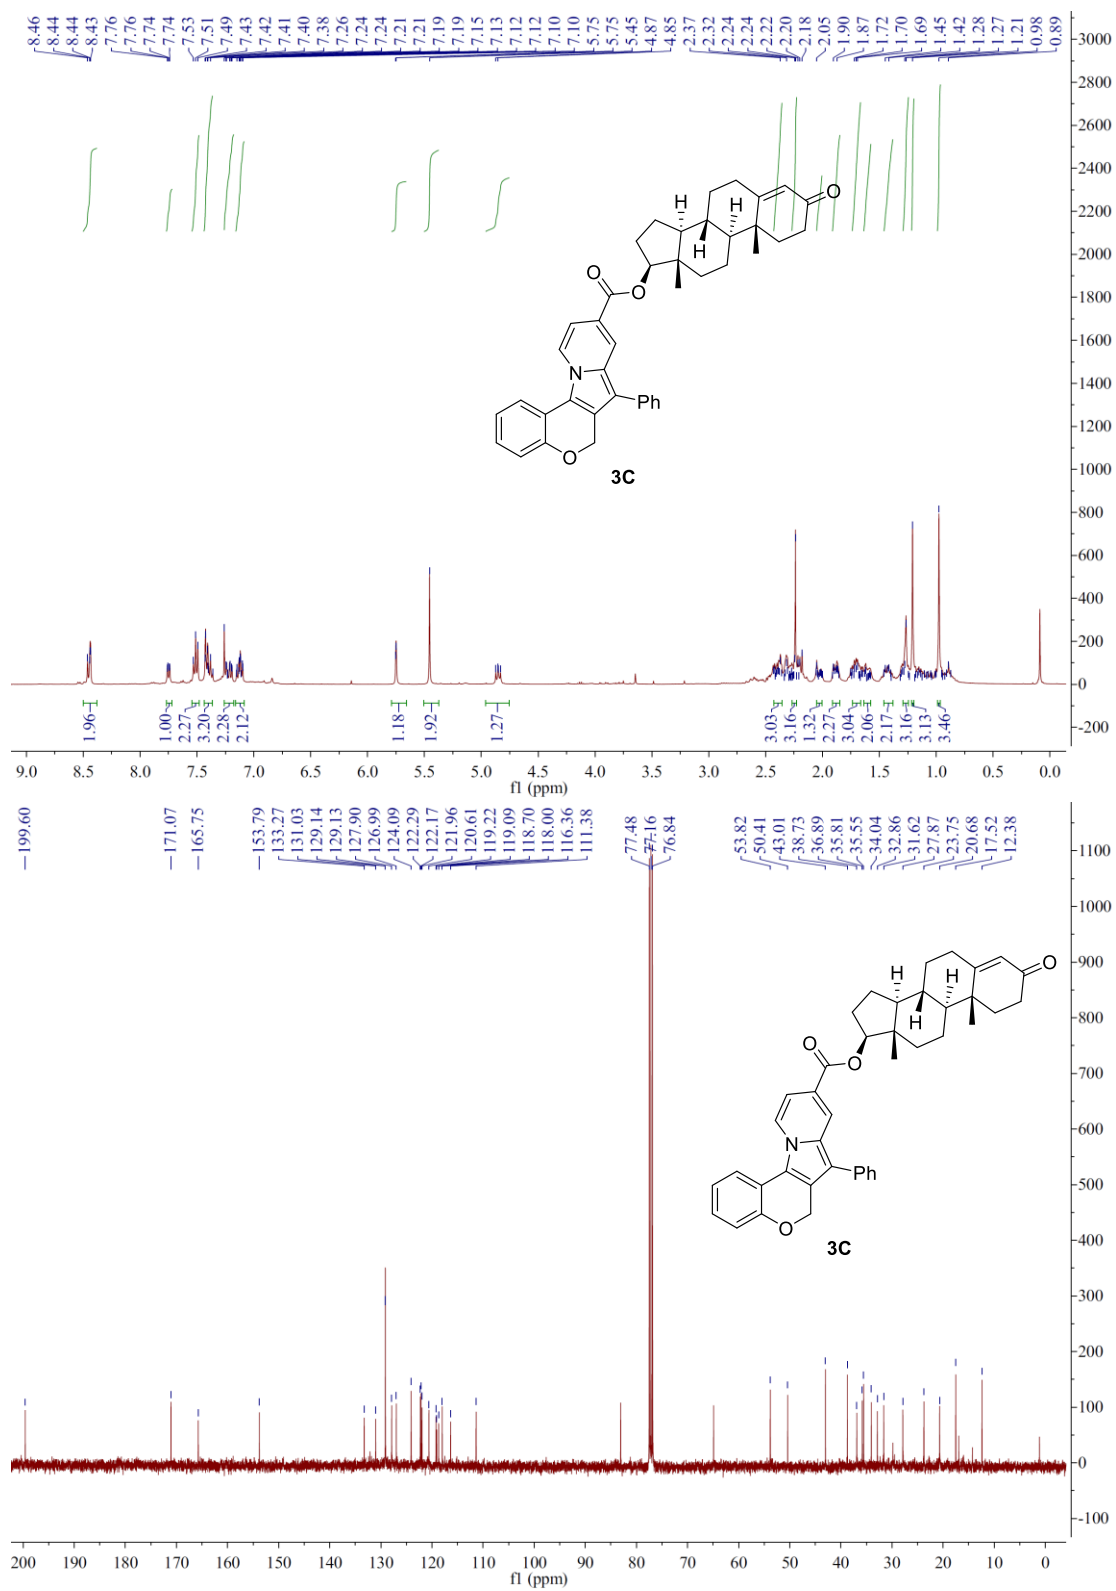

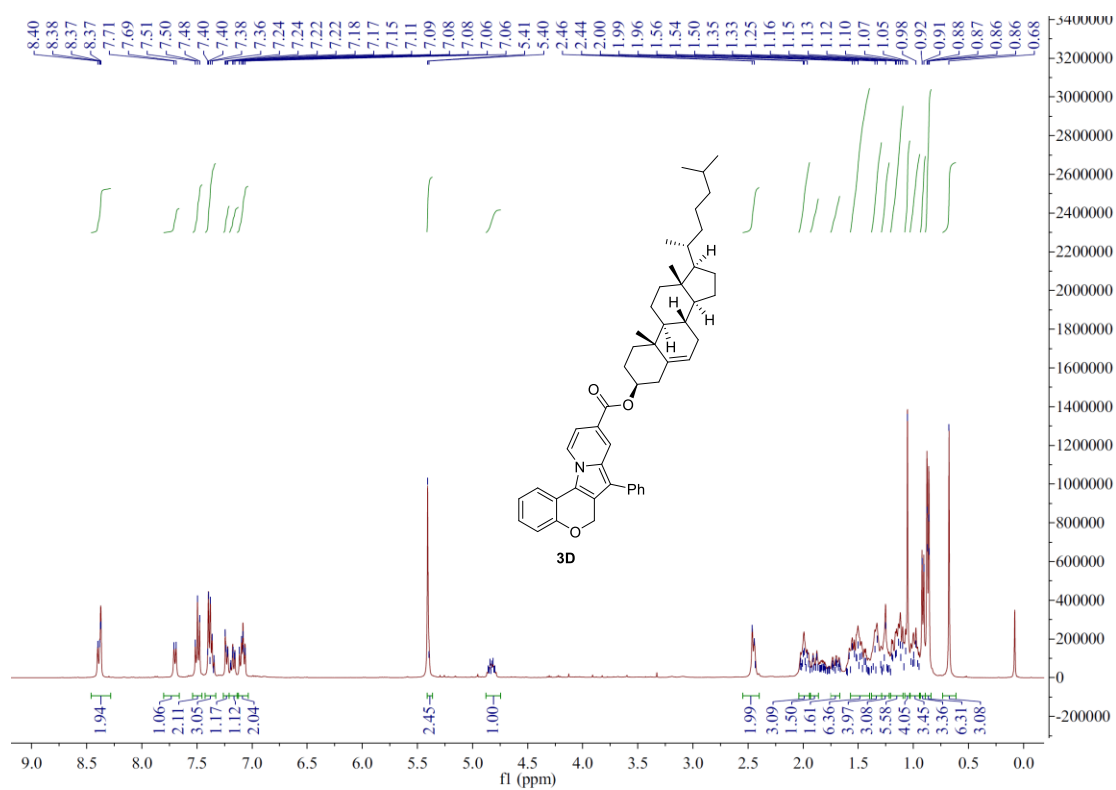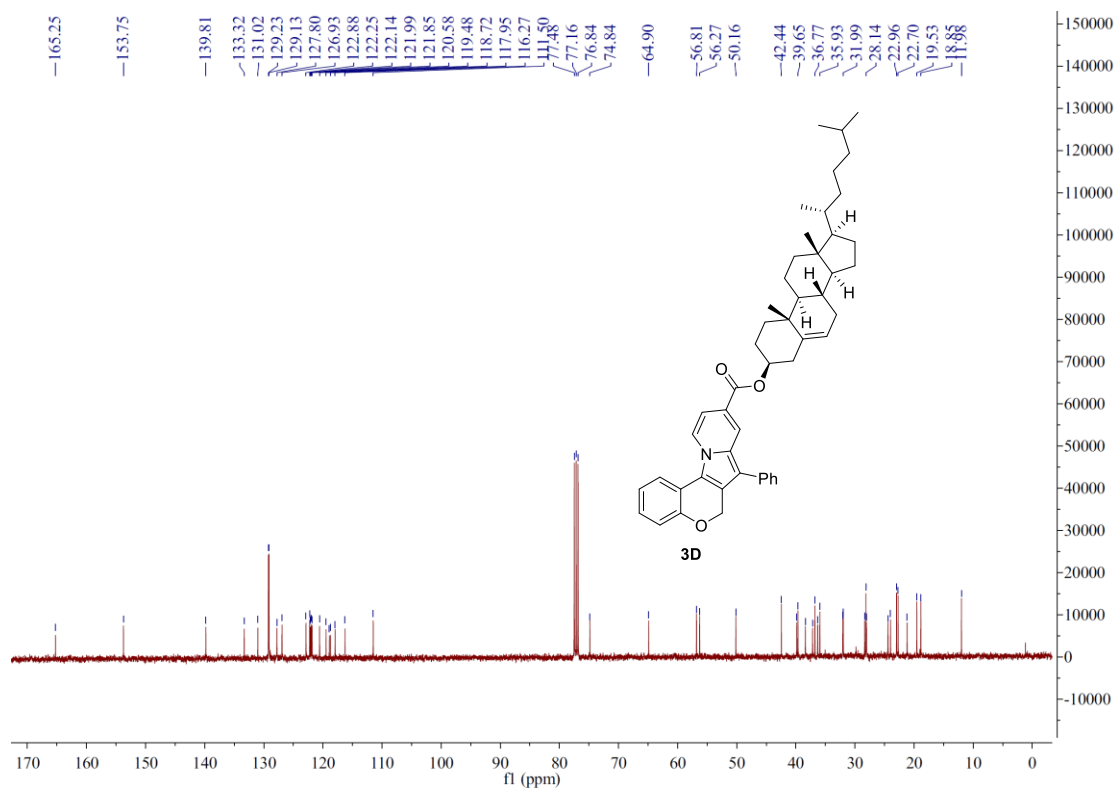

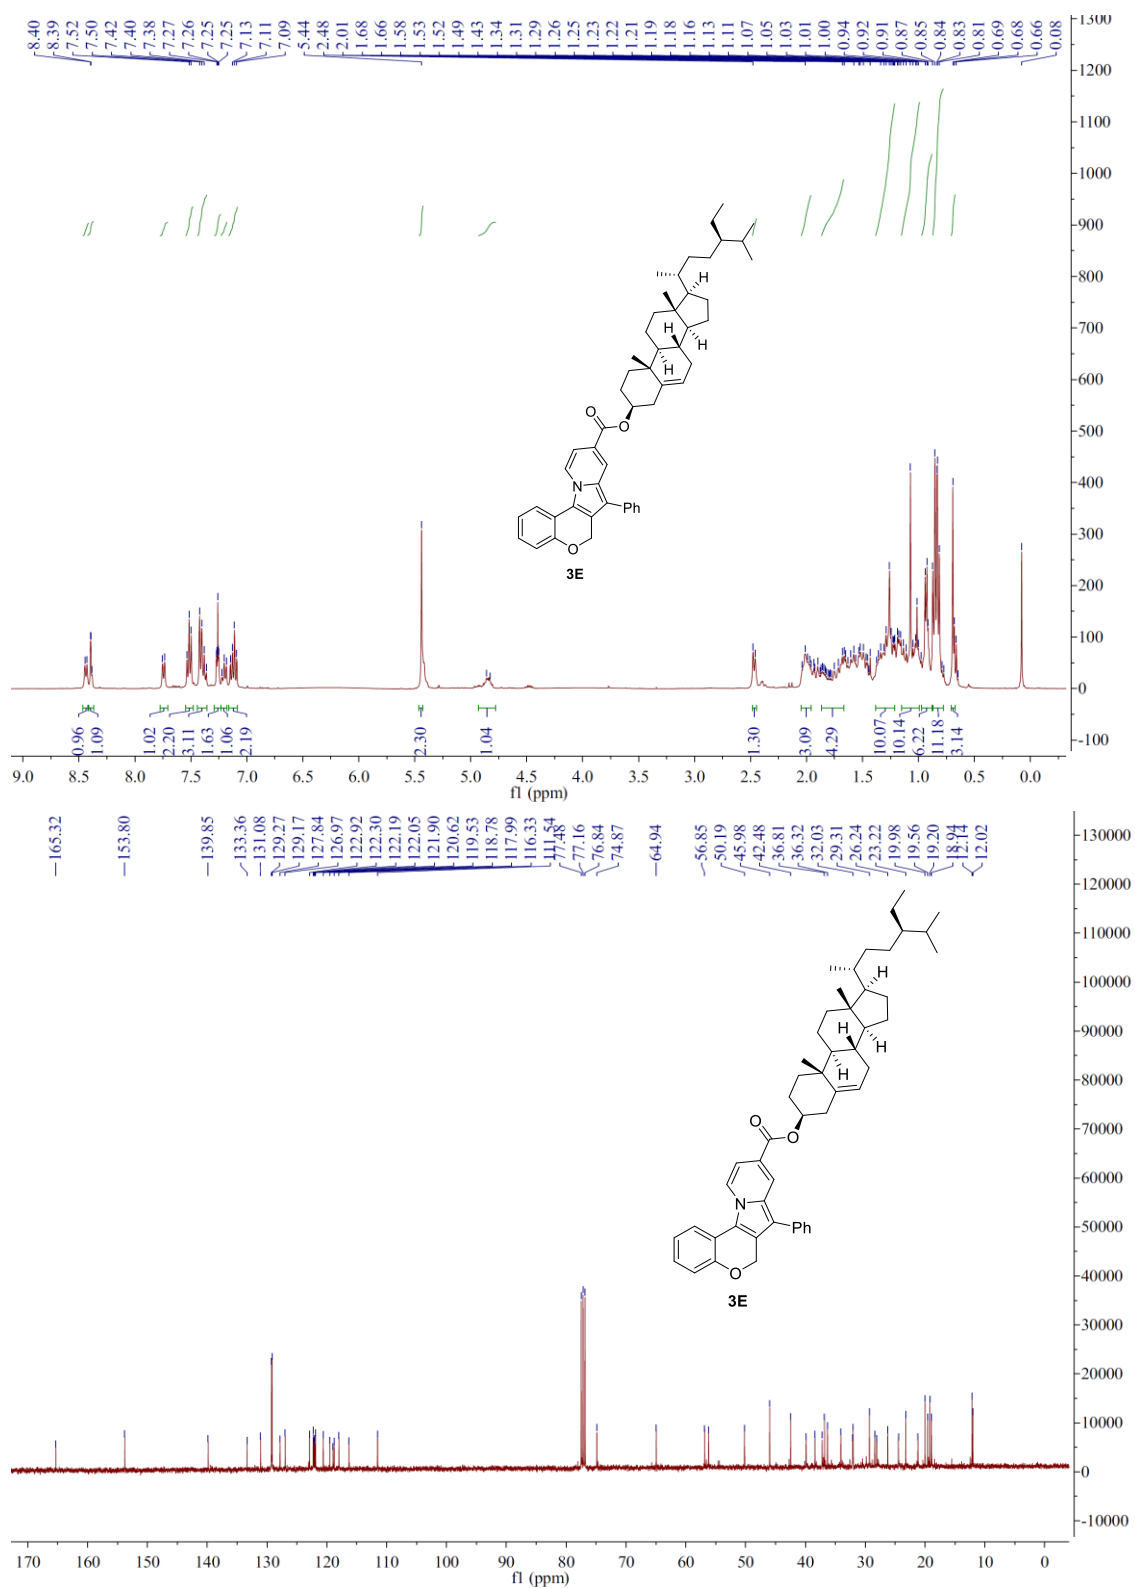

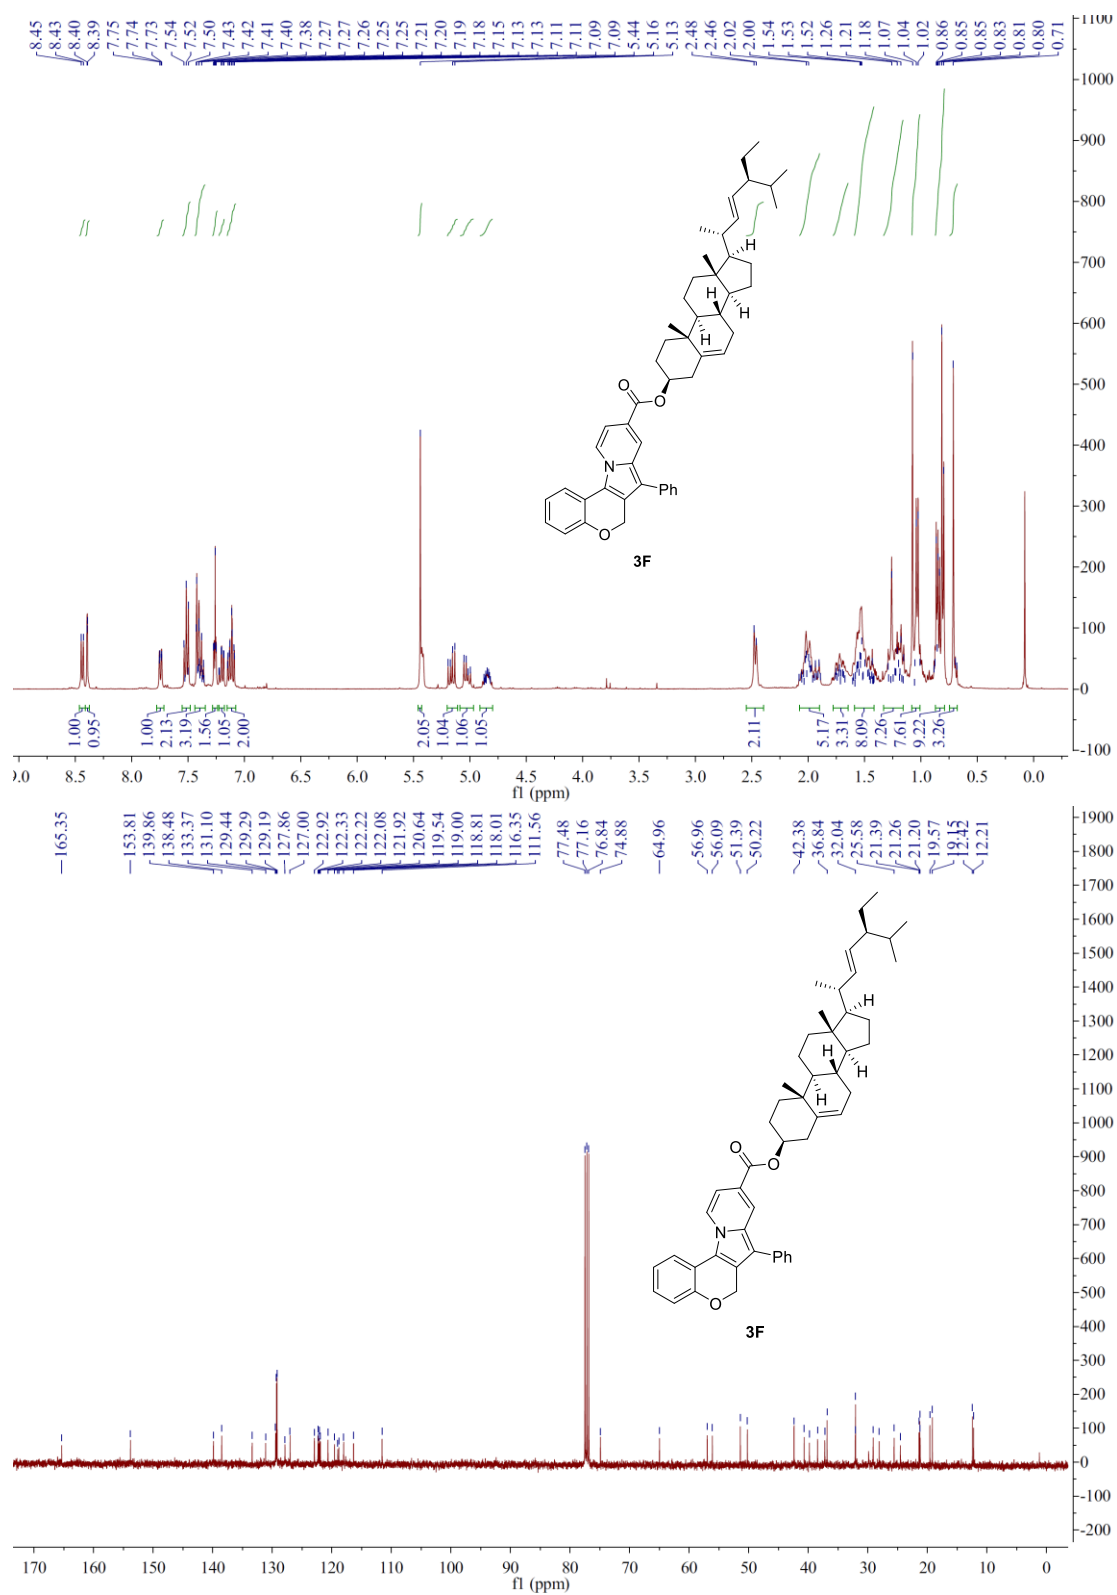

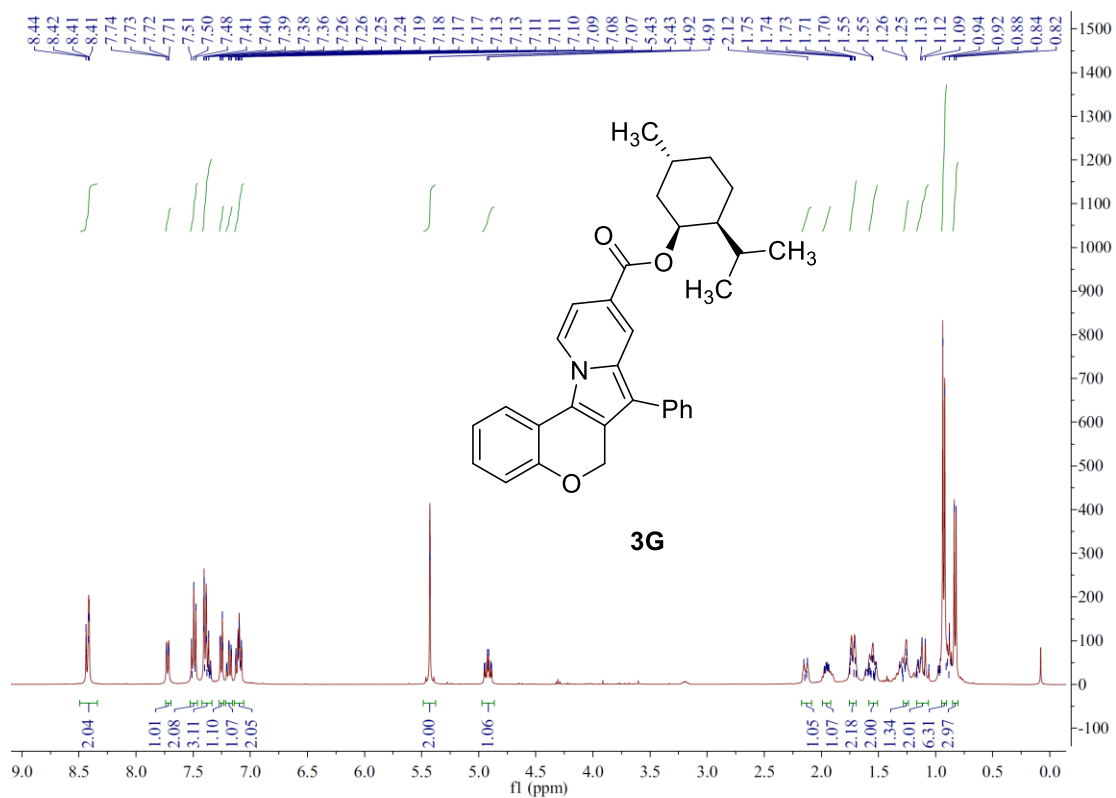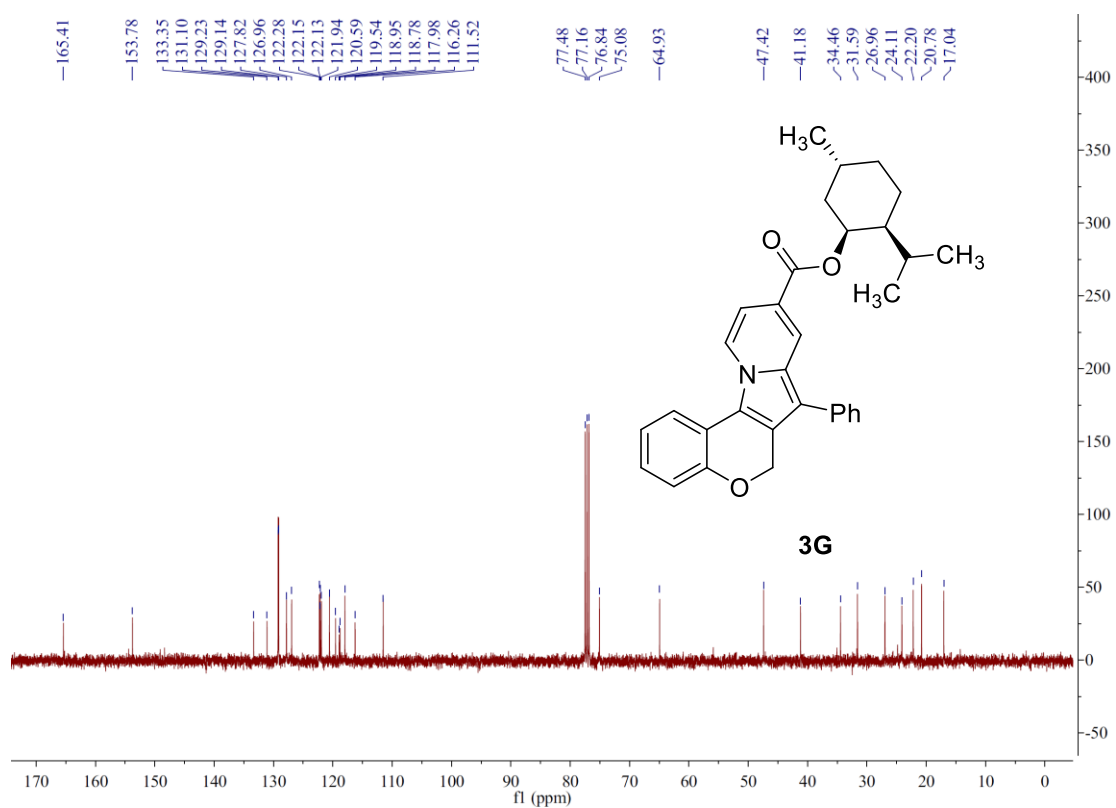

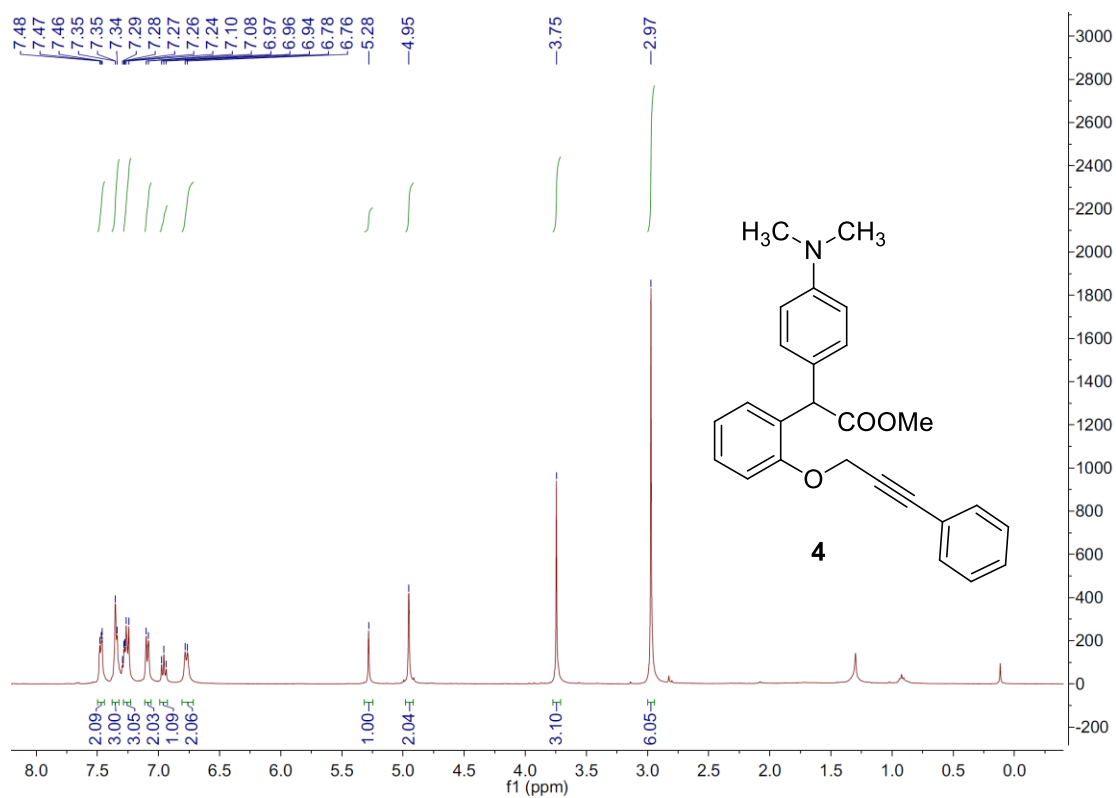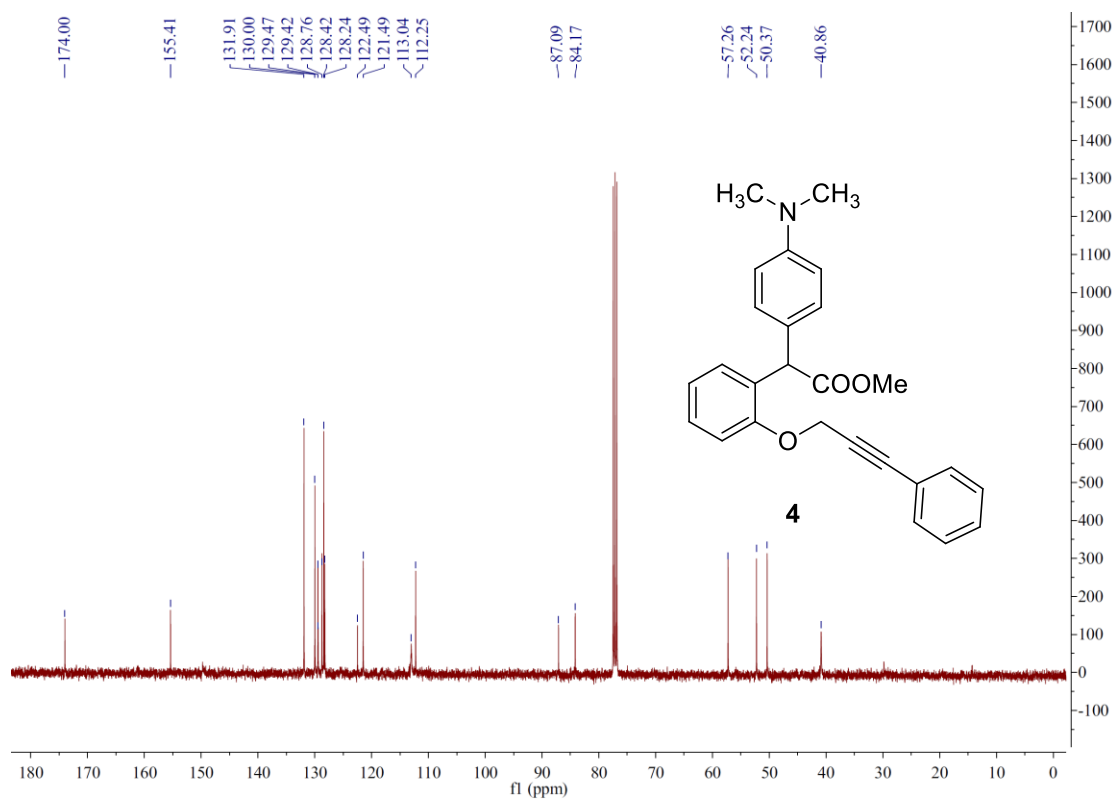

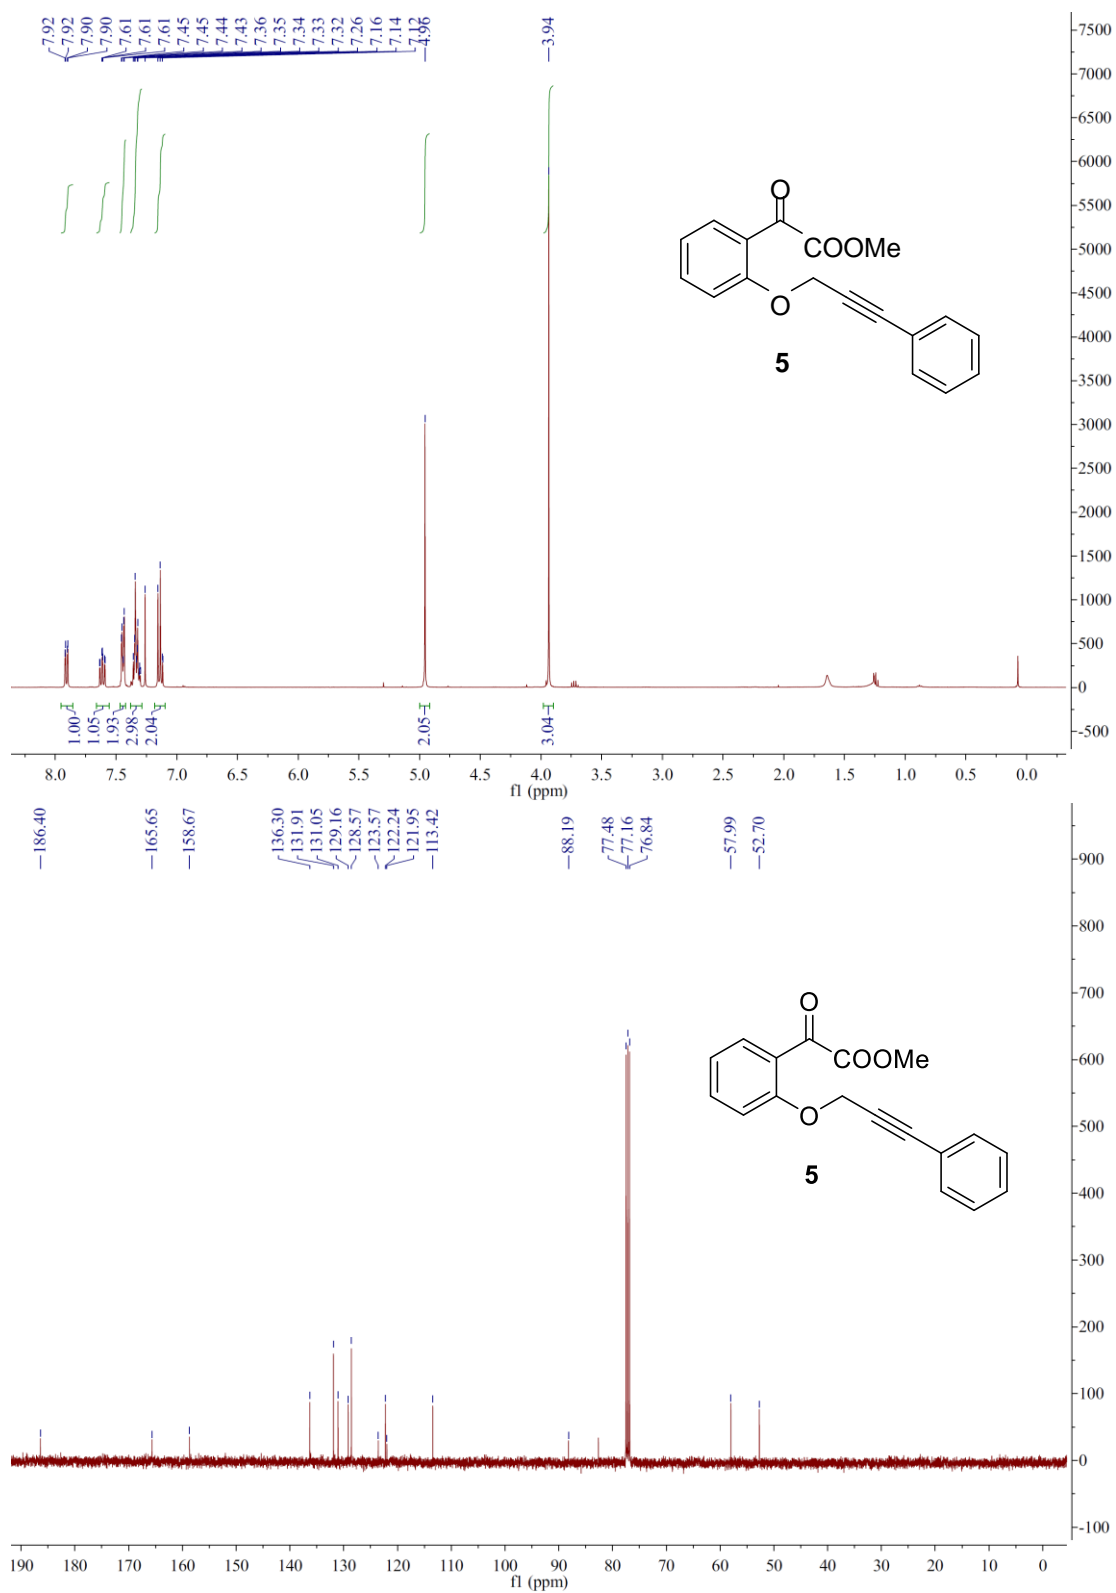

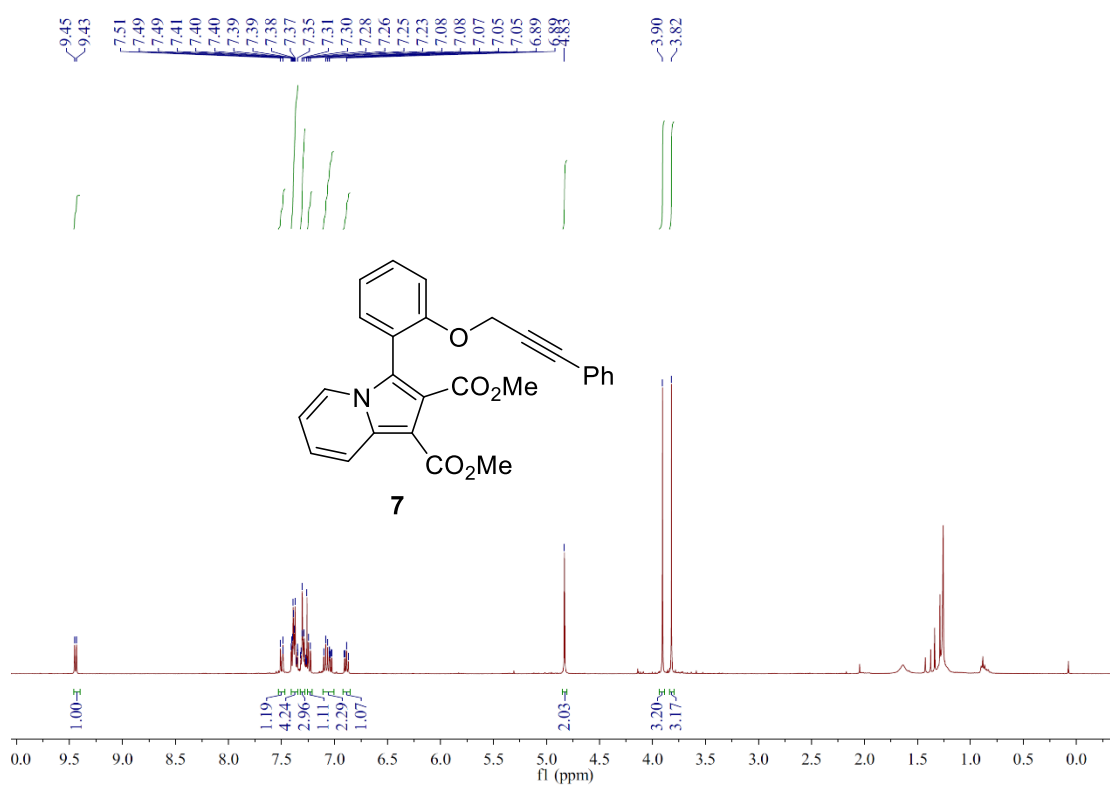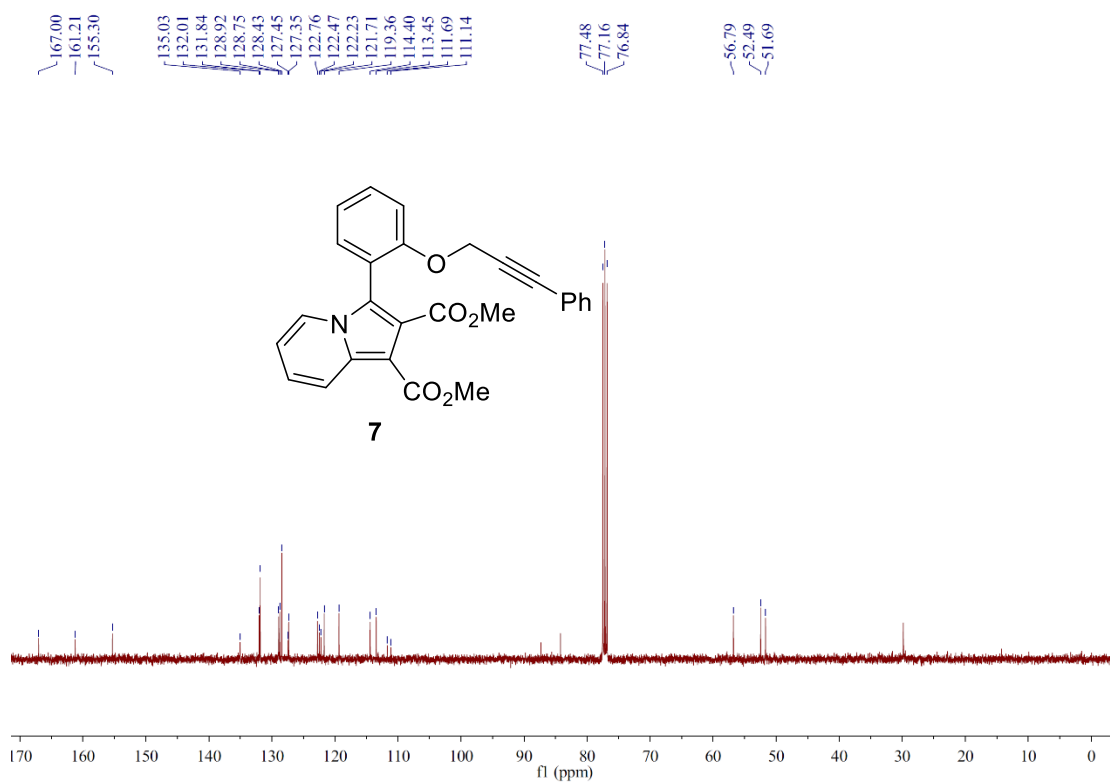

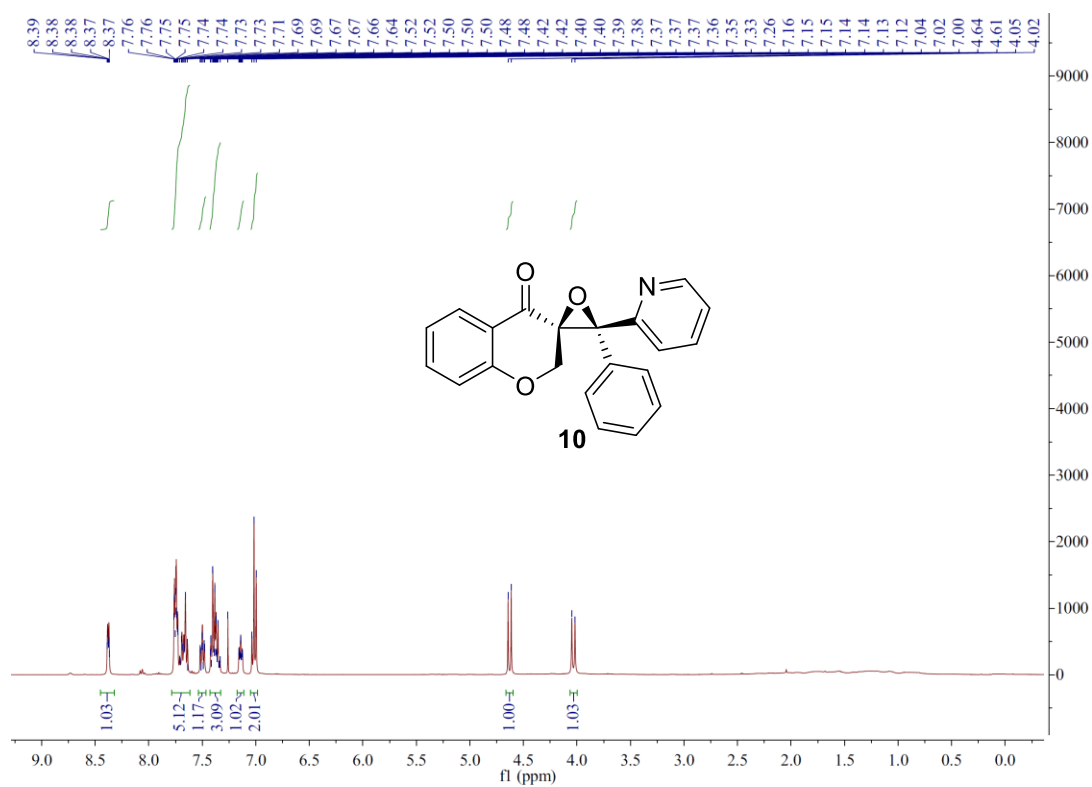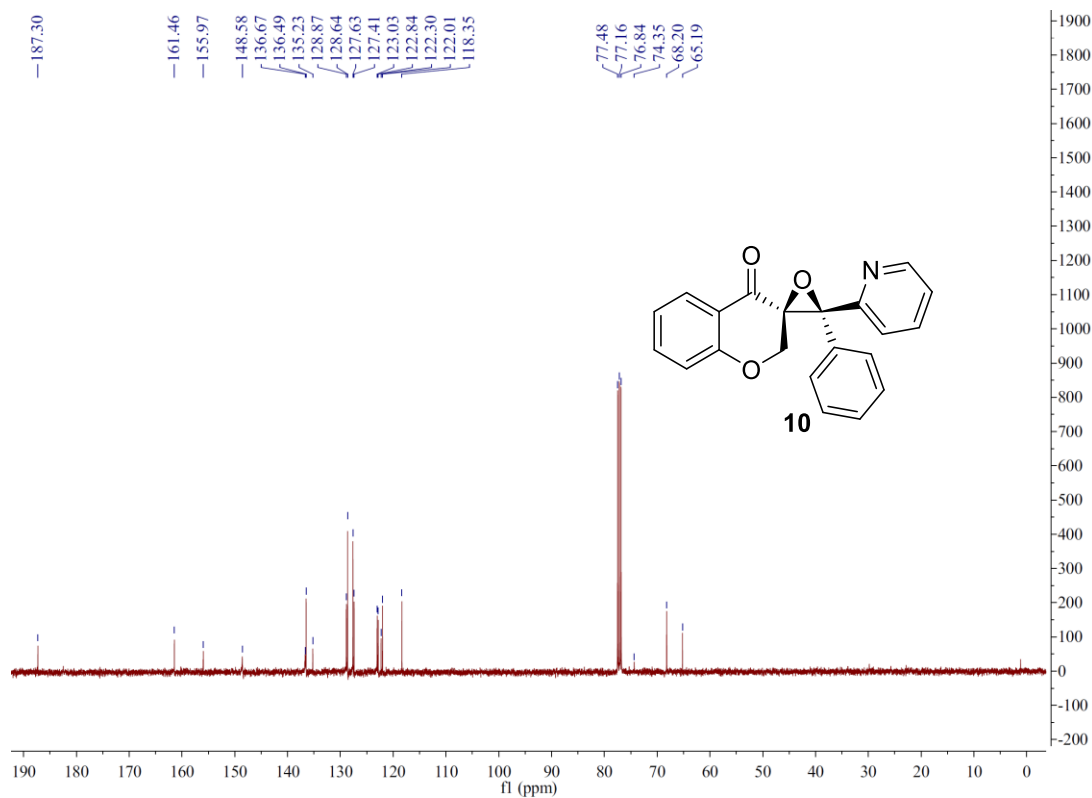

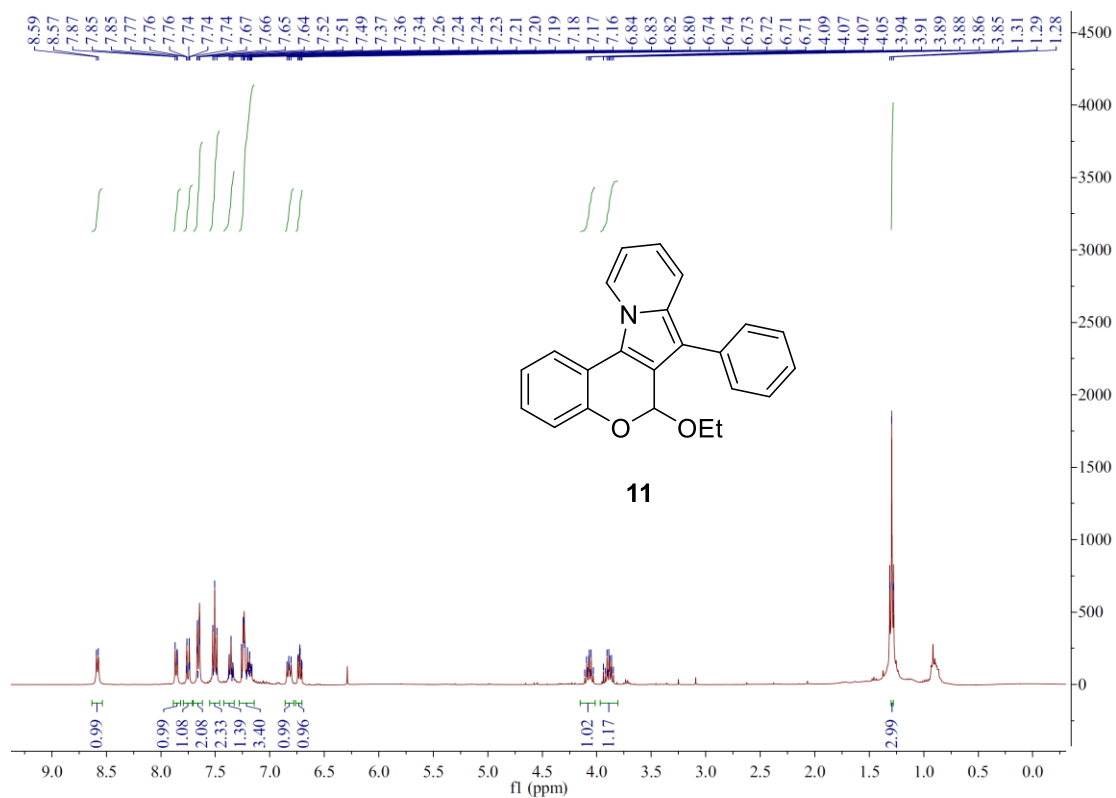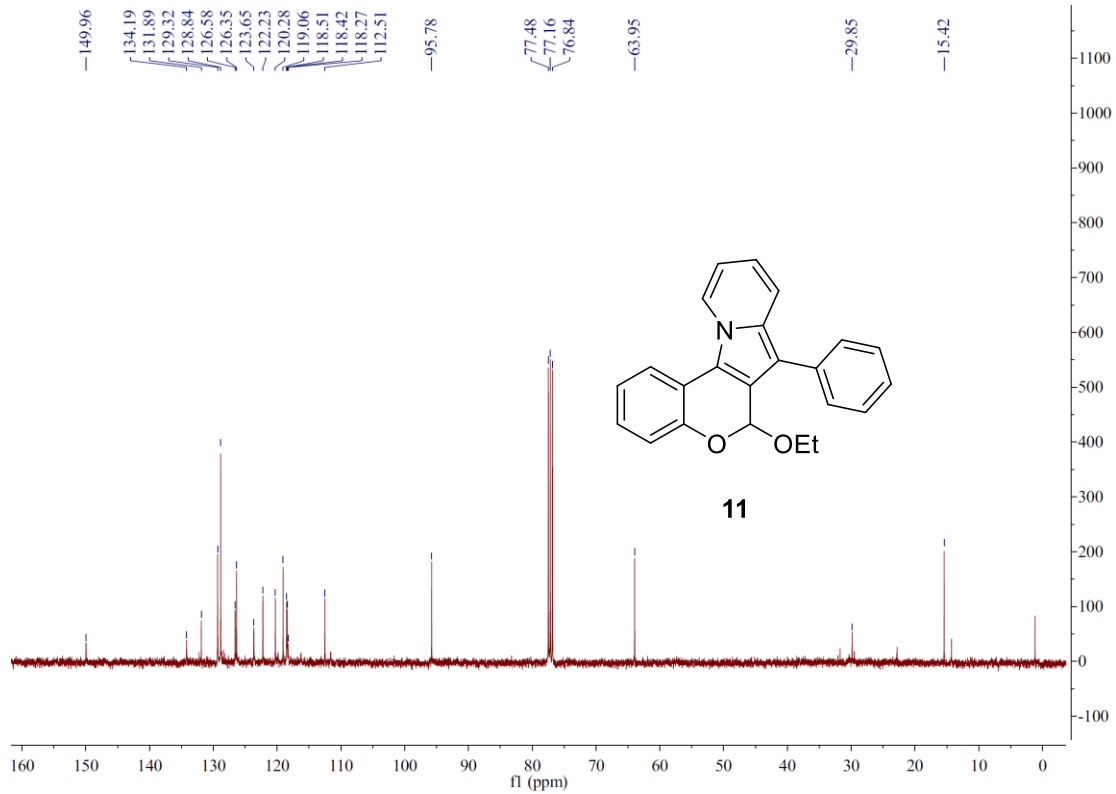

## Crystallographic Data for Compound 3a

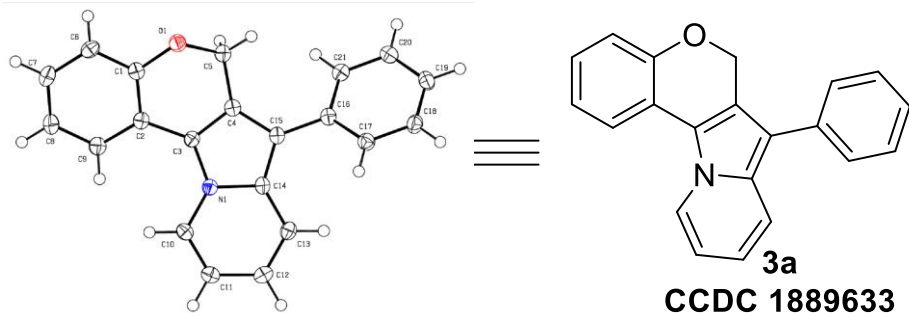

Bond precision: C-C = 0.0020 Å

Wavelength=0.71073

Cell: a=9.4156(5) b=14.0062(6) c=11.1540(6)  
 alpha=90 beta=104.097(2) gamma=90  
 Temperature: 120 K

|                        | Calculated  | Reported    |
|------------------------|-------------|-------------|
| Volume                 | 1426.66(12) | 1426.66(12) |
| Space group            | P 21/c      | P 21/c      |
| Hall group             | -P 2ybc     | -P 2ybc     |
| Moiety formula         | C21 H15 N O | ?           |
| Sum formula            | C21 H15 N O | C21 H15 N O |
| Mr                     | 297.34      | 297.34      |
| Dx, g cm <sup>-3</sup> | 1.384       | 1.384       |
| Z                      | 4           | 4           |
| Mu (mm <sup>-1</sup> ) | 0.085       | 0.085       |
| F000                   | 624.0       | 624.0       |
| F000'                  | 624.25      |             |
| h,k,lmax               | 12,18,14    | 12,18,14    |
| Nref                   | 3278        | 3268        |
| Tmin,Tmax              | 0.985,0.990 | 0.559,0.746 |
| Tmin'                  | 0.983       |             |

Correction method= # Reported T Limits: Tmin=0.559 Tmax=0.746  
 AbsCorr = MULTI-SCAN

Data completeness= 0.997

Theta(max)= 27.511

R(reflections)= 0.0402( 2589)

wR2(reflections)= 0.1001( 3268)

S = 1.038

Npar= 208

## Crystallographic Data for Compound 9

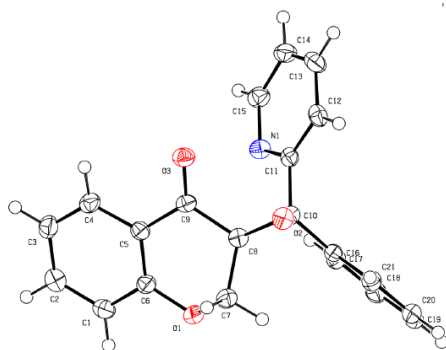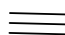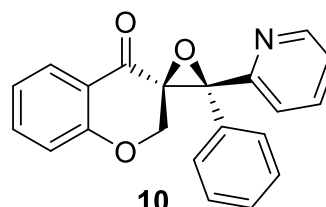

**10**  
**CCDC 1908849**

Bond precision: C-C = 0.0027 Å

Wavelength=0.71073

Cell: a=13.6852 (16)  
alpha=90

b=7.2265 (6)  
beta=90

c=32.525 (3)  
gamma=90

Temperature: 120 K

|                        | Calculated                                       |
|------------------------|--------------------------------------------------|
| Volume                 | 3216.6 (5)                                       |
| Space group            | P b c a                                          |
| Hall group             | -P 2ac 2ab                                       |
| Moiety formula         | C <sub>21</sub> H <sub>15</sub> N O <sub>3</sub> |
| Sum formula            | C <sub>21</sub> H <sub>15</sub> N O <sub>3</sub> |
| Mr                     | 329.34                                           |
| Dx, g cm <sup>-3</sup> | 1.360                                            |
| Z                      | 8                                                |
| Mu (mm <sup>-1</sup> ) | 0.092                                            |
| F <sub>000</sub>       | 1376.0                                           |
| F <sub>000</sub> '     | 1376.66                                          |
| h, k, lmax             | 17, 9, 42                                        |
| Nref                   | 3693                                             |
| Tmin, Tmax             | 0.982, 0.986                                     |
| Tmin'                  | 0.982                                            |

|                        | Reported                                         |
|------------------------|--------------------------------------------------|
| Volume                 | 3216.6 (5)                                       |
| Space group            | P b c a                                          |
| Hall group             | -P 2ac 2ab                                       |
| Moiety formula         | C <sub>21</sub> H <sub>15</sub> N O <sub>3</sub> |
| Sum formula            | C <sub>21</sub> H <sub>15</sub> N O <sub>3</sub> |
| Mr                     | 329.34                                           |
| Dx, g cm <sup>-3</sup> | 1.360                                            |
| Z                      | 8                                                |
| Mu (mm <sup>-1</sup> ) | 0.092                                            |
| F <sub>000</sub>       | 1376.0                                           |
| h, k, lmax             | 17, 9, 42                                        |
| Nref                   | 3673                                             |
| Tmin, Tmax             | 0.654, 0.746                                     |

Correction method= # Reported T Limits: Tmin=0.654 Tmax=0.746  
AbsCorr = MULTI-SCAN

Data completeness= 0.995

Theta(max)= 27.500

R(reflections)= 0.0451 ( 2507)

wR2(reflections)= 0.1173 ( 3673)

S = 1.065

Npar= 226
